# Supplementary material for: Formation of chlorinated disinfection by-products and fate of their precursors in individual processes of a conventional water treatment plant assessed using high-resolution mass spectrometry
Source: Royal Society of Chemistry journal article supplement (doi:10.1039/d4ew00372a), 2024-01-01
Supplement: d4ew00372a1.pdf [file d4ew00372a1.pdf]

**Formation of chlorinated disinfection by-products and fate of their  
precursors in individual processes of a conventional water treatment plant  
assessed by a high-resolution mass spectrometry**

Vitharuch Yuthawong<sup>\*a</sup>, Chatyapha Thongnueaha<sup>a</sup> and Phanwatt Phungsai<sup>b,c</sup>

<sup>a</sup> Department of Environmental Engineering, Faculty of Engineering, Kasetsart University, Bangkok 10900, Thailand

<sup>b</sup> Department of Environmental Engineering, Faculty of Engineering and Khon Kaen University, Khon Kaen 40002, Thailand

<sup>c</sup> Research Center for Environmental and Hazardous Substance Management, Khon Kaen University, Khon Kaen 40002, Thailand

\*Corresponding Author: Tel.: +660-2797-0999 ex 1009; e-mail address: [vitharuch.y@ku.th](mailto:vitharuch.y@ku.th)

**Contents in this Supporting Information.**

**1. Figures**

**2. Tables**

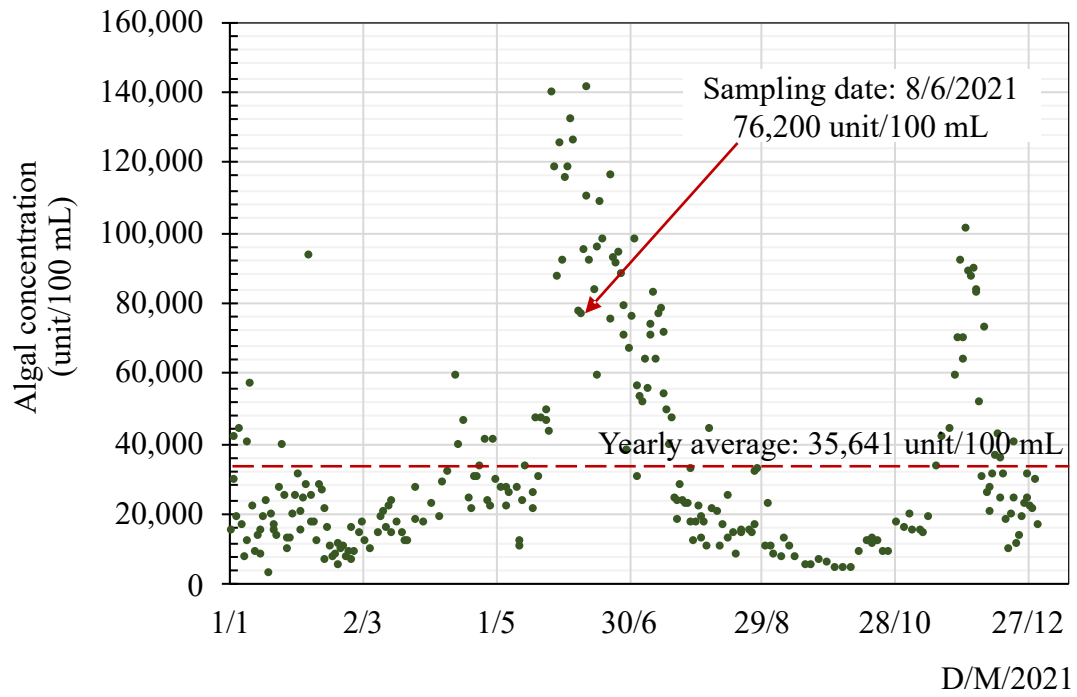

**Figure S1** Algal concentrations in raw water of Bangkhen Water Treatment Plant in 2021

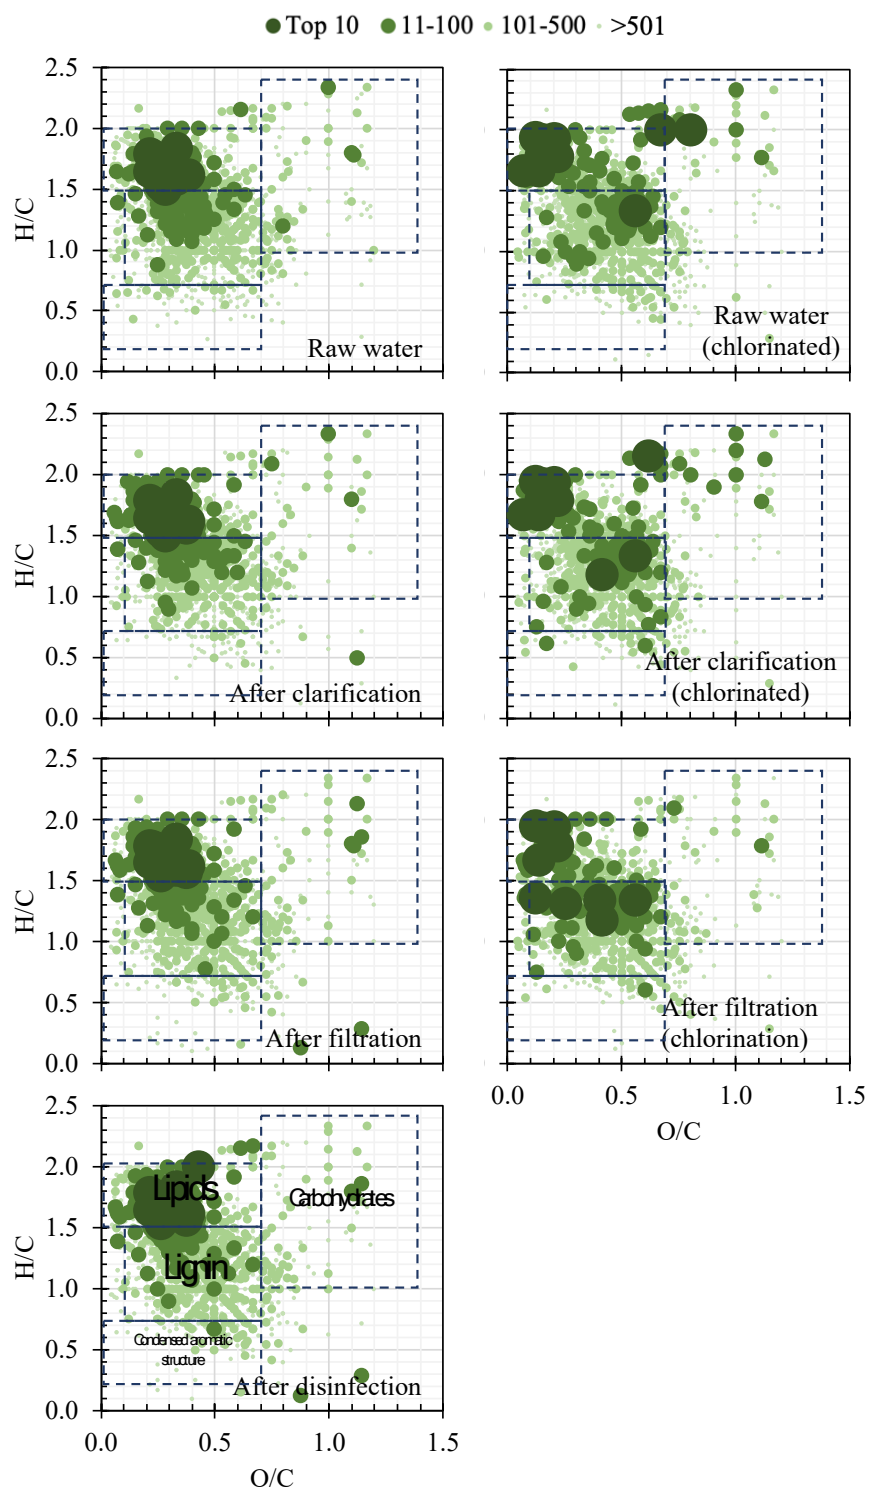

**Figure S2** van Krevelen diagram of CHO components in BK-WTP (left) before chlorination, and (right) after chlorination

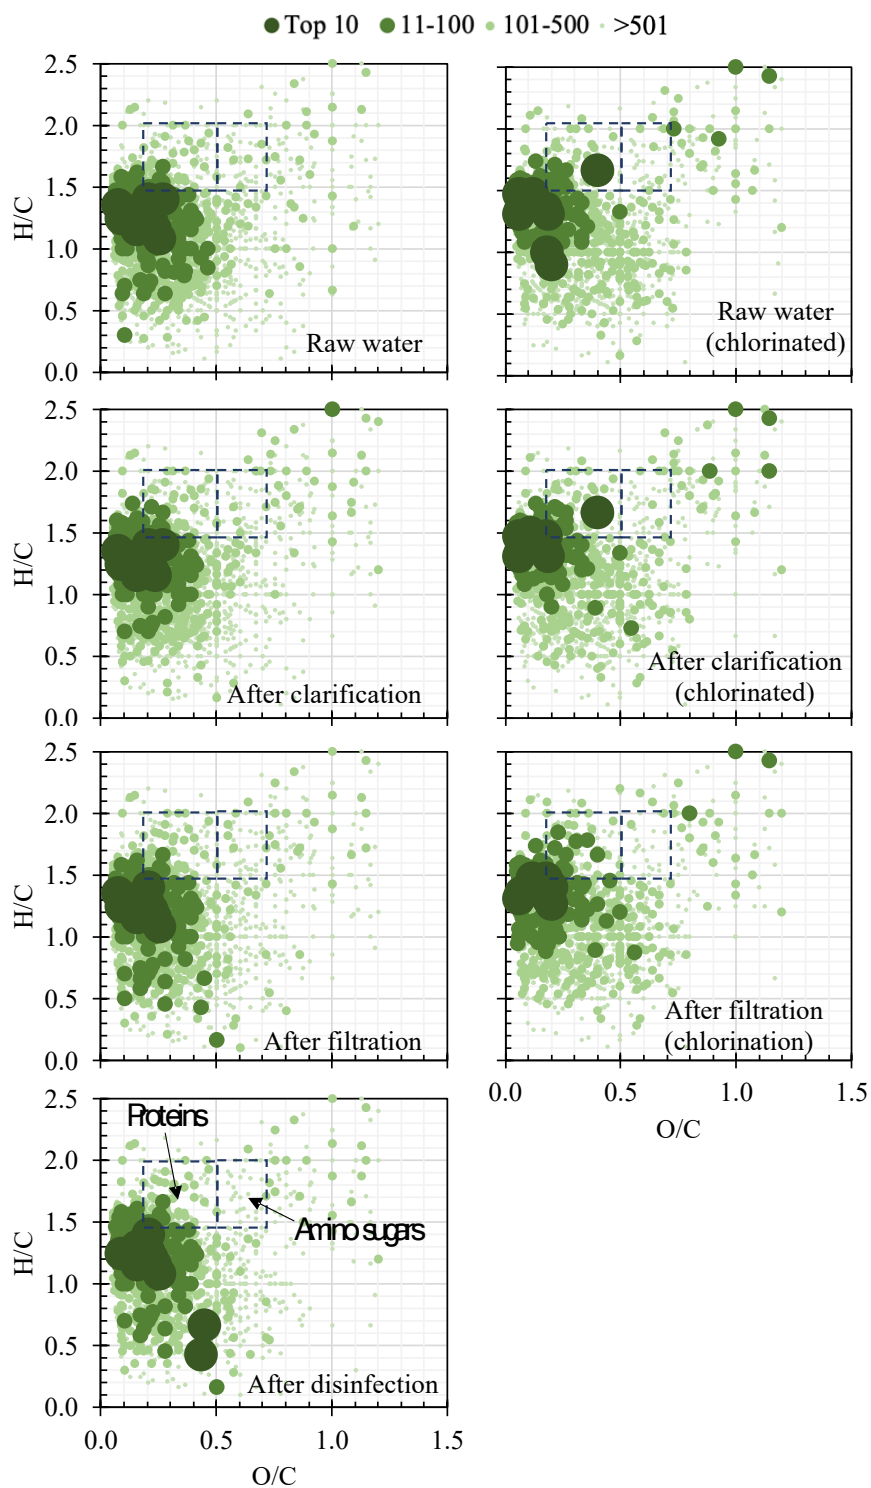

**Figure S3** van Krevelen diagram of CHON components in BK-WTP (left) before chlorination, and (right) after chlorination

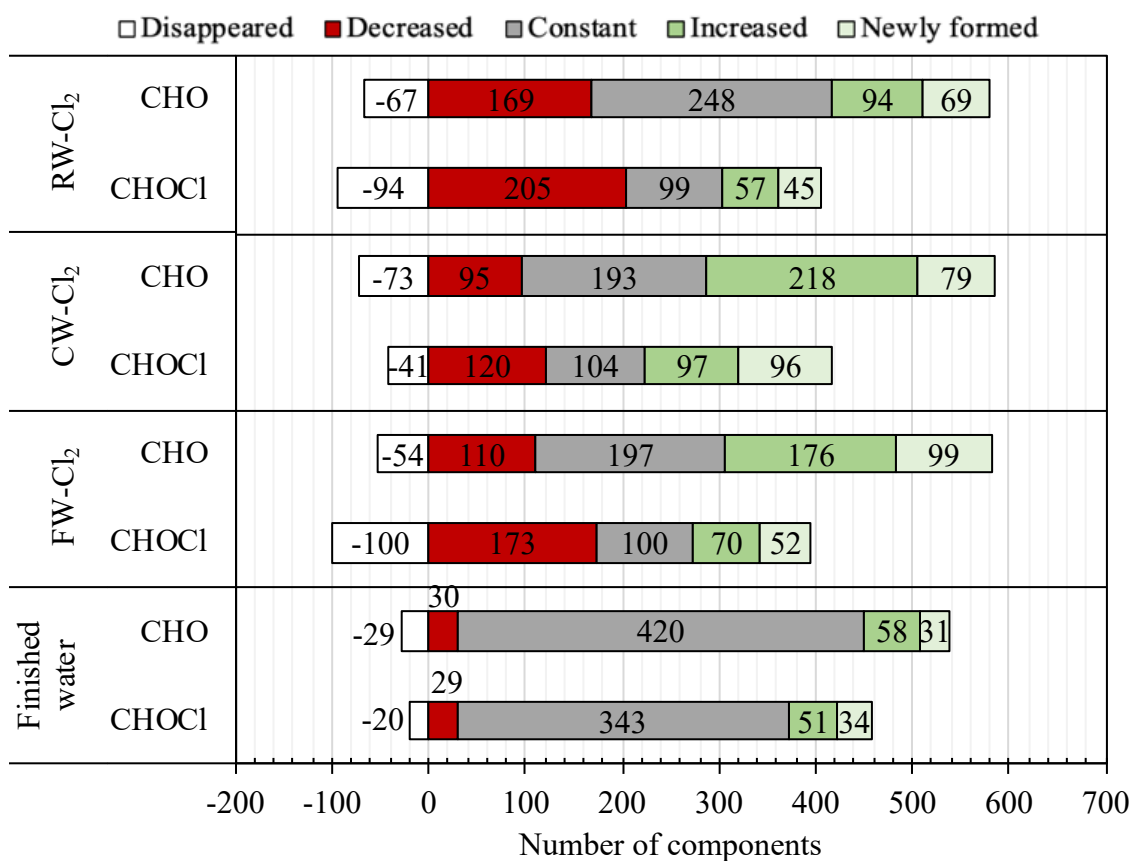

**Figure S4** Changes of CHO and CHOC1 components during water treatment processes

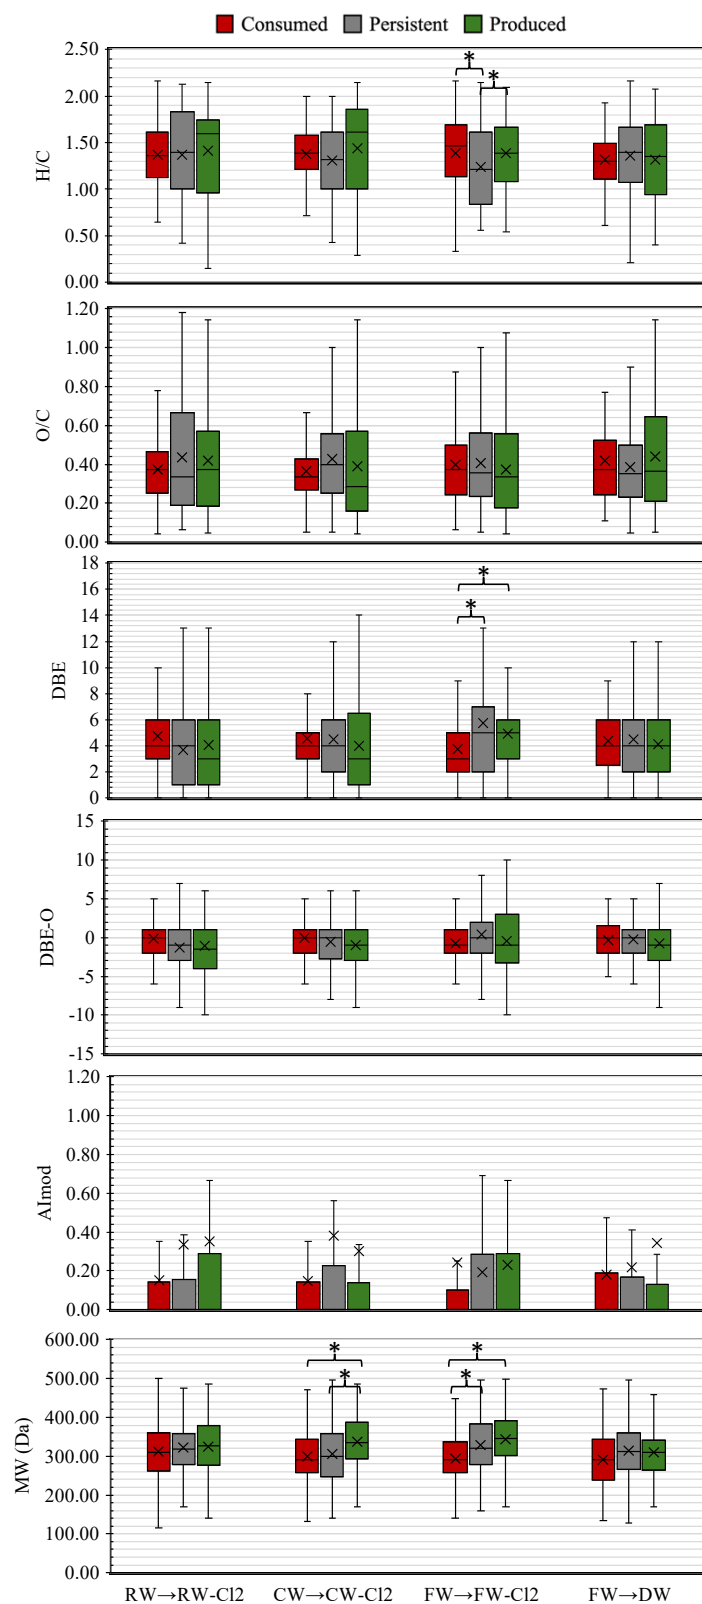

**Figure S5** Molecular characteristics of CHOC1 components classified into consumed, persistent, and produced after chlorination

(Asterix \* indicates significant difference (p-value < 0.05))

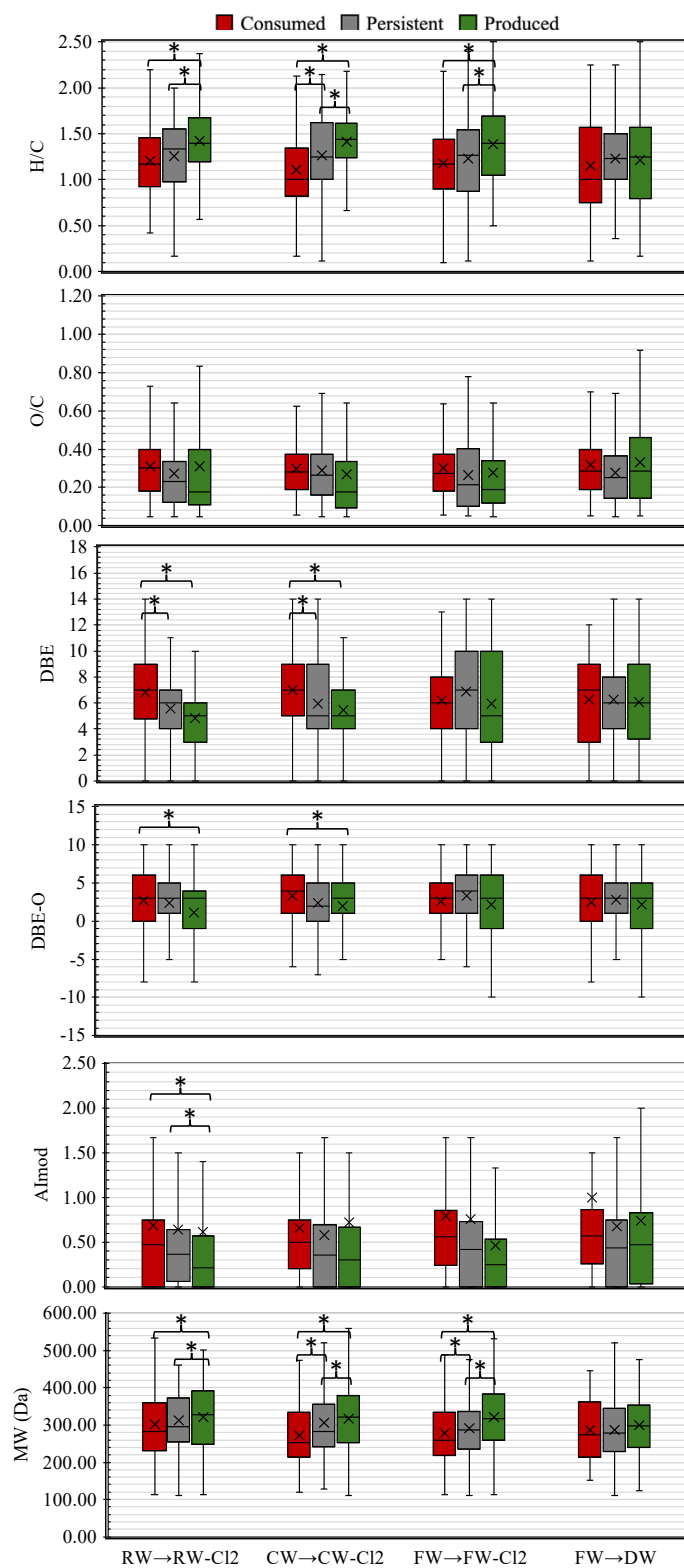

**Figure S6** Molecular characteristics of CHONCl components classified into consumed, persistent, and produced after chlorination

(Asterix \* indicates significant difference (p-value < 0.05))

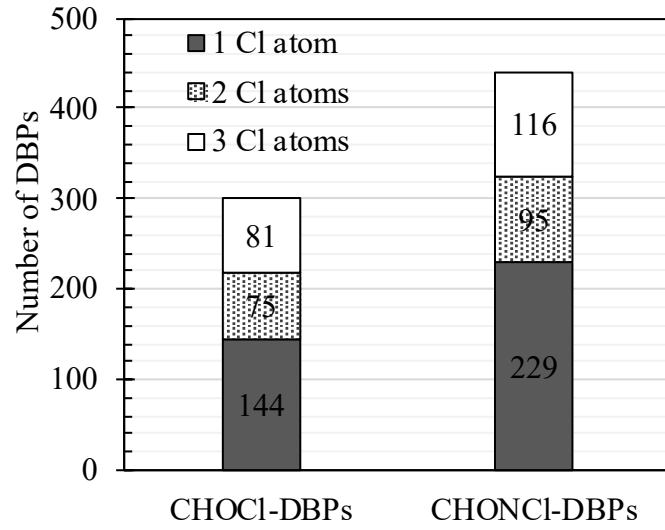

**Figure S7** Number of chlorine atoms in DBPs observed in this study



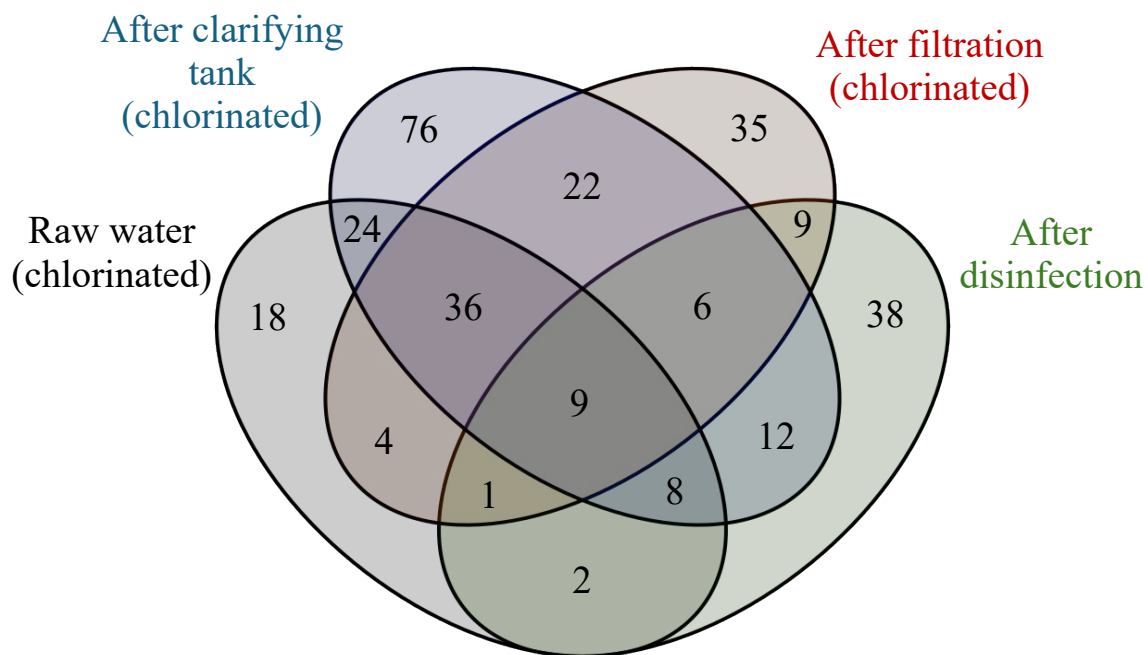

**Figure S8** Venn diagram of CHOCI-DBP components detected in chlorinated samples and finished water

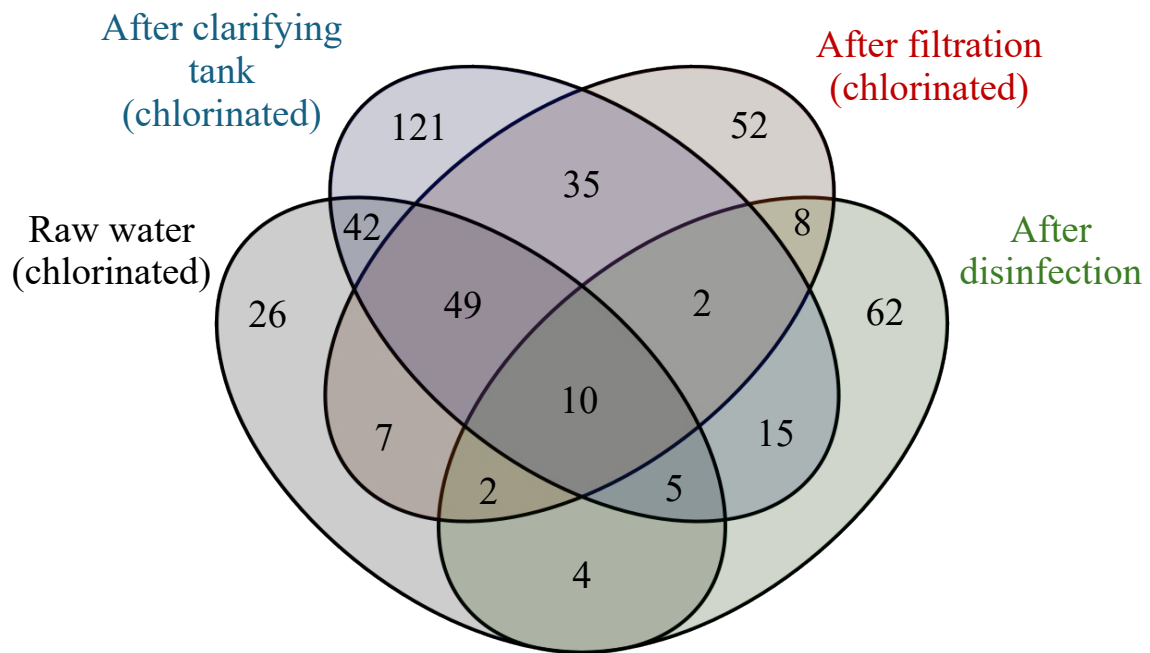

**Figure S9** Venn diagram of CHONCl-DBP components detected in chlorinated samples and finished water

**Table S1** Molecular characteristics of CHO, CHOCl, CHON, and CHONCl components in raw water sample

| Molecular characteristics | CHO and CHOCl | CHON and CHONCl | Welch's t-test at 5% significant level |
|---------------------------|---------------|-----------------|----------------------------------------|
| Number                    | 1033          | 1340            | -                                      |
| H/C                       | 1.28          | 1.16            | <0.05                                  |
| O/C                       | 0.44          | 0.37            | 0.21                                   |
| DBE                       | 5.67          | 7.32            | <0.05                                  |
| DBE-O                     | -0.12         | 2.55            | <0.05                                  |
| AI <sub>mod</sub>         | 0.29          | 0.52            | <0.05                                  |
| MW                        | 303.10        | 313.01          | 0.08                                   |

**Table S2** Number of components, total absolute intensity, and number-average molecular characteristics of CHO/CHOC1 and CHON/CHONCl during water treatment processes

|                                           | RW            |                 | CW            |                 | FW            |                 | Finished water |                 |
|-------------------------------------------|---------------|-----------------|---------------|-----------------|---------------|-----------------|----------------|-----------------|
|                                           | CHO and CHOC1 | CHON and CHONCl | CHO and CHOC1 | CHON and CHONCl | CHO and CHOC1 | CHON and CHONCl | CHO and CHOC1  | CHON and CHONCl |
| Number of components                      | 1033          | 1340            | 941           | 1012            | 980           | 1223            | 996            | 1249            |
| Total Abs. intensity ( $\times 10^{10}$ ) | 1.19          | 2.47            | 0.49          | 0.87            | 0.61          | 1.22            | 0.60           | 1.18            |
| H/C                                       | 1.28          | 1.16            | 1.28          | 1.16            | 1.27          | 1.13            | 1.28           | 1.13            |
| O/C                                       | 0.44          | 0.37            | 0.44          | 0.35            | 0.44          | 0.36            | 0.44           | 0.37            |
| DBE                                       | 5.67          | 7.32            | 5.68          | 7.14            | 5.60          | 7.19            | 5.53           | 7.19            |
| DBE-O                                     | -0.12         | 2.55            | -0.12         | 2.77            | -0.07         | 2.76            | -0.15          | 2.65            |
| AI <sub>mod</sub>                         | 0.29          | 0.52            | 0.23          | 0.53            | 0.23          | 0.55            | 0.24           | 0.54            |
| MW                                        | 303.10        | 313.01          | 297.79        | 302.02          | 297.57        | 301.65          | 298.60         | 302.43          |

**Table S3** Dissolved organic carbon (DOC) concentrations and specific UV absorbance (SUVA) of the samples before and after chlorination

| Samples        | DOC conc. (mg L <sup>-1</sup> ) |                       | SUVA (L mg <sup>-1</sup> m <sup>-1</sup> ) |                       |
|----------------|---------------------------------|-----------------------|--------------------------------------------|-----------------------|
|                | Before Cl <sub>2</sub>          | After Cl <sub>2</sub> | Before Cl <sub>2</sub>                     | After Cl <sub>2</sub> |
| RW             | 6.3                             | 5.2                   | 1.47                                       | 0.91                  |
| CW             | 3.5                             | 3.4                   | 1.99                                       | 0.74                  |
| FW             | 3.5                             | 3.6                   | 1.36                                       | 0.56                  |
| Finished water | 3.8                             | -                     | 1.52                                       | -                     |

**Table S4** CHO-DBPs detected in chlorinated samples and finished water in this study. RW-Cl<sub>2</sub>, CW-Cl<sub>2</sub>, and FW-Cl<sub>2</sub> denote chlorinated raw water, chlorinated clarified water, and chlorinated filtered water, respectively.

| DBP formula                                                    | Theo. MW (Da) | Presence(s) of DBPs in this study |                    |                    |                | Also reported in reference(s)                                       |
|----------------------------------------------------------------|---------------|-----------------------------------|--------------------|--------------------|----------------|---------------------------------------------------------------------|
|                                                                |               | RW-Cl <sub>2</sub>                | CW-Cl <sub>2</sub> | FW-Cl <sub>2</sub> | Finished water |                                                                     |
| C <sub>13</sub> H <sub>15</sub> OCl                            | 222.0811      | ✓                                 | ✓                  | ✓                  | ✓              |                                                                     |
| C <sub>12</sub> H <sub>17</sub> O <sub>6</sub> Cl              | 292.0714      | ✓                                 | ✓                  | ✓                  | ✓              | Lavonen et al. (2013), Zhang et al. (2014)                          |
| C <sub>9</sub> H <sub>16</sub> O <sub>7</sub> Cl <sub>2</sub>  | 306.0273      | ✓                                 | ✓                  | ✓                  | ✓              |                                                                     |
| C <sub>18</sub> H <sub>11</sub> O <sub>3</sub> Cl              | 310.0397      | ✓                                 | ✓                  | ✓                  | ✓              |                                                                     |
| C <sub>17</sub> H <sub>23</sub> O <sub>3</sub> Cl              | 310.1336      | ✓                                 | ✓                  | ✓                  | ✓              |                                                                     |
| C <sub>15</sub> H <sub>23</sub> O <sub>5</sub> Cl              | 318.1234      | ✓                                 | ✓                  | ✓                  | ✓              | Lavonen et al. (2013), Zhang et al. (2014)                          |
| C <sub>11</sub> H <sub>19</sub> O <sub>9</sub> Cl              | 330.0718      | ✓                                 | ✓                  | ✓                  | ✓              |                                                                     |
| C <sub>14</sub> H <sub>23</sub> O <sub>7</sub> Cl              | 338.1132      | ✓                                 | ✓                  | ✓                  | ✓              | Lavonen et al. (2013)                                               |
| C <sub>21</sub> H <sub>40</sub> O <sub>2</sub> Cl <sub>2</sub> | 394.2405      | ✓                                 | ✓                  | ✓                  | ✓              |                                                                     |
| C <sub>8</sub> H <sub>7</sub> O <sub>2</sub> Cl                | 170.0135      |                                   | ✓                  | ✓                  | ✓              |                                                                     |
| C <sub>6</sub> H <sub>8</sub> O <sub>2</sub> Cl <sub>2</sub>   | 181.9901      | ✓                                 | ✓                  |                    | ✓              |                                                                     |
| C <sub>7</sub> H <sub>12</sub> OCl <sub>2</sub>                | 182.0265      | ✓                                 | ✓                  | ✓                  |                |                                                                     |
| C <sub>13</sub> H <sub>21</sub> OCl                            | 228.1281      | ✓                                 | ✓                  | ✓                  |                |                                                                     |
| C <sub>7</sub> H <sub>14</sub> O <sub>4</sub> Cl <sub>2</sub>  | 232.0269      | ✓                                 | ✓                  | ✓                  |                |                                                                     |
| C <sub>12</sub> H <sub>9</sub> O <sub>3</sub> Cl               | 236.0240      | ✓                                 | ✓                  | ✓                  |                |                                                                     |
| C <sub>12</sub> H <sub>11</sub> O <sub>4</sub> Cl              | 254.0346      | ✓                                 | ✓                  | ✓                  |                | Lavonen et al. (2013), Zhang et al. (2014)                          |
| C <sub>6</sub> H <sub>3</sub> O <sub>5</sub> Cl <sub>3</sub>   | 259.9046      | ✓                                 | ✓                  |                    | ✓              |                                                                     |
| C <sub>10</sub> H <sub>19</sub> OCl <sub>3</sub>               | 260.0501      | ✓                                 | ✓                  |                    | ✓              |                                                                     |
| C <sub>11</sub> H <sub>21</sub> O <sub>5</sub> Cl              | 268.1078      | ✓                                 | ✓                  | ✓                  |                |                                                                     |
| C <sub>11</sub> H <sub>21</sub> OCl <sub>3</sub>               | 274.0658      | ✓                                 | ✓                  |                    | ✓              |                                                                     |
| C <sub>14</sub> H <sub>13</sub> O <sub>4</sub> Cl              | 280.0502      |                                   | ✓                  | ✓                  | ✓              | Lavonen et al. (2013), Zhang et al. (2014)                          |
| C <sub>11</sub> H <sub>19</sub> O <sub>6</sub> Cl              | 282.0870      | ✓                                 | ✓                  | ✓                  |                |                                                                     |
| C <sub>10</sub> H <sub>8</sub> O <sub>6</sub> Cl <sub>2</sub>  | 293.9698      | ✓                                 | ✓                  |                    | ✓              | Lavonen et al. (2013), Zhang et al. (2014)                          |
| C <sub>12</sub> H <sub>11</sub> O <sub>7</sub> Cl              | 302.0193      |                                   | ✓                  | ✓                  | ✓              | Lavonen et al. (2013), Zhang et al. (2014), Andersson et al. (2021) |
| C <sub>12</sub> H <sub>17</sub> O <sub>7</sub> Cl              | 308.0663      | ✓                                 | ✓                  | ✓                  |                | Lavonen et al. (2013)                                               |
| C <sub>14</sub> H <sub>11</sub> O <sub>6</sub> Cl              | 310.0244      | ✓                                 | ✓                  | ✓                  |                | Lavonen et al. (2013), Zhang et al. (2014)                          |
| C <sub>13</sub> H <sub>21</sub> O <sub>2</sub> Cl <sub>3</sub> | 314.0607      | ✓                                 | ✓                  |                    | ✓              |                                                                     |
| C <sub>17</sub> H <sub>19</sub> O <sub>4</sub> Cl              | 322.0972      | ✓                                 | ✓                  | ✓                  |                | Lavonen et al. (2013), Zhang et al. (2014)                          |
| C <sub>16</sub> H <sub>31</sub> O <sub>4</sub> Cl              | 322.1911      | ✓                                 | ✓                  | ✓                  |                |                                                                     |
| C <sub>8</sub> H <sub>5</sub> O <sub>8</sub> Cl <sub>3</sub>   | 333.9050      | ✓                                 | ✓                  |                    | ✓              |                                                                     |
| C <sub>14</sub> H <sub>21</sub> O <sub>7</sub> Cl              | 336.0976      | ✓                                 |                    | ✓                  | ✓              | Lavonen et al. (2013), Zhang et al. (2014), Andersson et al. (2021) |
| C <sub>15</sub> H <sub>25</sub> O <sub>2</sub> Cl <sub>3</sub> | 342.0920      | ✓                                 | ✓                  | ✓                  |                |                                                                     |
| C <sub>18</sub> H <sub>15</sub> O <sub>5</sub> Cl              | 346.0608      | ✓                                 | ✓                  | ✓                  |                |                                                                     |
| C <sub>15</sub> H <sub>23</sub> O <sub>7</sub> Cl              | 350.1132      | ✓                                 | ✓                  | ✓                  |                | Lavonen et al. (2013), Zhang et al. (2014)                          |
| C <sub>16</sub> H <sub>27</sub> O <sub>6</sub> Cl              | 350.1496      | ✓                                 | ✓                  | ✓                  |                | Lavonen et al. (2013)                                               |

| DBP formula                                                     | Theo. MW (Da) | Presence(s) of DBPs in this study |                    |                    |                | Also reported in reference(s)                                      |
|-----------------------------------------------------------------|---------------|-----------------------------------|--------------------|--------------------|----------------|--------------------------------------------------------------------|
|                                                                 |               | RW-Cl <sub>2</sub>                | CW-Cl <sub>2</sub> | FW-Cl <sub>2</sub> | Finished water |                                                                    |
| C <sub>14</sub> H <sub>23</sub> O <sub>8</sub> Cl               | 354.1081      | ✓                                 | ✓                  | ✓                  |                |                                                                    |
| C <sub>17</sub> H <sub>25</sub> O <sub>6</sub> Cl               | 360.1340      | ✓                                 | ✓                  | ✓                  |                | Lavonen et al. (2013), Zhang et al. (2014), Phungsai et al. (2018) |
| C <sub>18</sub> H <sub>31</sub> O <sub>5</sub> Cl               | 362.1860      | ✓                                 | ✓                  | ✓                  |                |                                                                    |
| C <sub>17</sub> H <sub>13</sub> O <sub>7</sub> Cl               | 364.0350      | ✓                                 | ✓                  | ✓                  |                | Lavonen et al. (2013), Zhang et al. (2014)                         |
| C <sub>18</sub> H <sub>17</sub> O <sub>6</sub> Cl               | 364.0714      | ✓                                 | ✓                  | ✓                  |                | Lavonen et al. (2013), Zhang et al. (2014)                         |
| C <sub>15</sub> H <sub>23</sub> O <sub>8</sub> Cl               | 366.1081      | ✓                                 | ✓                  | ✓                  |                | Lavonen et al. (2013)                                              |
| C <sub>17</sub> H <sub>33</sub> O <sub>2</sub> Cl <sub>3</sub>  | 374.1546      | ✓                                 | ✓                  | ✓                  |                |                                                                    |
| C <sub>16</sub> H <sub>23</sub> O <sub>8</sub> Cl               | 378.1081      | ✓                                 | ✓                  | ✓                  |                | Lavonen et al. (2013), Zhang et al. (2014)                         |
| C <sub>14</sub> H <sub>26</sub> O <sub>8</sub> Cl <sub>2</sub>  | 392.1005      | ✓                                 | ✓                  | ✓                  |                |                                                                    |
| C <sub>16</sub> H <sub>31</sub> O <sub>4</sub> Cl <sub>3</sub>  | 392.1288      | ✓                                 | ✓                  | ✓                  |                |                                                                    |
| C <sub>14</sub> H <sub>29</sub> O <sub>10</sub> Cl              | 392.1449      |                                   | ✓                  | ✓                  | ✓              |                                                                    |
| C <sub>18</sub> H <sub>29</sub> O <sub>7</sub> Cl               | 392.1602      | ✓                                 | ✓                  | ✓                  |                | Lavonen et al. (2013)                                              |
| C <sub>17</sub> H <sub>27</sub> O <sub>8</sub> Cl               | 394.1394      | ✓                                 | ✓                  | ✓                  |                | Lavonen et al. (2013)                                              |
| C <sub>18</sub> H <sub>29</sub> O <sub>3</sub> Cl <sub>3</sub>  | 398.1182      | ✓                                 | ✓                  | ✓                  |                |                                                                    |
| C <sub>22</sub> H <sub>21</sub> OCl <sub>3</sub>                | 406.0658      | ✓                                 | ✓                  | ✓                  |                |                                                                    |
| C <sub>14</sub> H <sub>27</sub> O <sub>11</sub> Cl              | 406.1242      |                                   | ✓                  | ✓                  | ✓              |                                                                    |
| C <sub>17</sub> H <sub>33</sub> O <sub>4</sub> Cl <sub>3</sub>  | 406.1444      |                                   | ✓                  | ✓                  | ✓              |                                                                    |
| C <sub>13</sub> H <sub>22</sub> O <sub>10</sub> Cl <sub>2</sub> | 408.0590      | ✓                                 | ✓                  | ✓                  |                |                                                                    |
| C <sub>24</sub> H <sub>24</sub> O <sub>2</sub> Cl <sub>2</sub>  | 414.1153      | ✓                                 | ✓                  | ✓                  |                |                                                                    |
| C <sub>18</sub> H <sub>33</sub> O <sub>4</sub> Cl <sub>3</sub>  | 418.1444      | ✓                                 | ✓                  |                    | ✓              |                                                                    |
| C <sub>14</sub> H <sub>25</sub> O <sub>12</sub> Cl              | 420.1035      | ✓                                 | ✓                  | ✓                  |                |                                                                    |
| C <sub>13</sub> H <sub>17</sub> O <sub>14</sub> Cl              | 432.0307      | ✓                                 | ✓                  | ✓                  |                |                                                                    |
| C <sub>16</sub> H <sub>30</sub> O <sub>9</sub> Cl <sub>2</sub>  | 436.1267      | ✓                                 | ✓                  | ✓                  |                |                                                                    |
| C <sub>26</sub> H <sub>25</sub> O <sub>4</sub> Cl               | 436.1441      | ✓                                 | ✓                  | ✓                  |                |                                                                    |
| C <sub>22</sub> H <sub>37</sub> O <sub>5</sub> Cl <sub>3</sub>  | 486.1707      | ✓                                 | ✓                  | ✓                  |                |                                                                    |
| C <sub>5</sub> H <sub>8</sub> O <sub>2</sub> Cl <sub>2</sub>    | 169.9901      | ✓                                 |                    |                    | ✓              |                                                                    |
| C <sub>9</sub> H <sub>5</sub> O <sub>4</sub> Cl                 | 211.9876      |                                   | ✓                  |                    | ✓              |                                                                    |
| C <sub>13</sub> H <sub>7</sub> OCl                              | 214.0185      |                                   | ✓                  | ✓                  |                |                                                                    |
| C <sub>9</sub> H <sub>12</sub> O <sub>2</sub> Cl <sub>2</sub>   | 222.0214      | ✓                                 | ✓                  |                    |                |                                                                    |
| C <sub>12</sub> H <sub>12</sub> OCl <sub>2</sub>                | 242.0265      |                                   |                    | ✓                  | ✓              |                                                                    |
| C <sub>7</sub> H <sub>15</sub> O <sub>7</sub> Cl                | 246.0506      | ✓                                 | ✓                  |                    |                |                                                                    |
| C <sub>7</sub> H <sub>5</sub> O <sub>8</sub> Cl                 | 251.9673      |                                   |                    | ✓                  | ✓              |                                                                    |
| C <sub>16</sub> H <sub>15</sub> OCl                             | 258.0811      |                                   | ✓                  |                    | ✓              |                                                                    |
| C <sub>9</sub> H <sub>5</sub> O <sub>7</sub> Cl                 | 259.9724      | ✓                                 | ✓                  |                    |                | Zhang et al. (2014)                                                |
| C <sub>14</sub> H <sub>13</sub> O <sub>3</sub> Cl               | 264.0553      |                                   | ✓                  | ✓                  |                |                                                                    |
| C <sub>16</sub> H <sub>27</sub> OCl                             | 270.1750      |                                   | ✓                  |                    | ✓              |                                                                    |
| C <sub>11</sub> H <sub>19</sub> OCl <sub>3</sub>                | 272.0501      | ✓                                 | ✓                  |                    |                |                                                                    |
| C <sub>11</sub> H <sub>8</sub> O <sub>4</sub> Cl <sub>2</sub>   | 273.9800      |                                   |                    | ✓                  | ✓              | Lavonen et al. (2013), Zhang et al. (2014)                         |

| DBP formula                                                    | Theo. MW (Da) | Presence(s) of DBPs in this study |                    |                    |                | Also reported in reference(s)                                       |
|----------------------------------------------------------------|---------------|-----------------------------------|--------------------|--------------------|----------------|---------------------------------------------------------------------|
|                                                                |               | RW-Cl <sub>2</sub>                | CW-Cl <sub>2</sub> | FW-Cl <sub>2</sub> | Finished water |                                                                     |
| C <sub>14</sub> H <sub>27</sub> O <sub>3</sub> Cl              | 278.1649      | ✓                                 | ✓                  |                    |                |                                                                     |
| C <sub>13</sub> H <sub>9</sub> O <sub>5</sub> Cl               | 280.0139      | ✓                                 | ✓                  |                    |                | Lavonen et al. (2013), Zhang et al. (2014)                          |
| C <sub>7</sub> H <sub>2</sub> O <sub>8</sub> Cl <sub>2</sub>   | 283.9127      | ✓                                 | ✓                  |                    |                |                                                                     |
| C <sub>12</sub> H <sub>9</sub> O <sub>6</sub> Cl               | 284.0088      | ✓                                 | ✓                  |                    |                | Lavonen et al. (2013), Andersson et al. (2021)                      |
| C <sub>8</sub> H <sub>5</sub> O <sub>5</sub> Cl <sub>3</sub>   | 285.9203      | ✓                                 | ✓                  |                    |                |                                                                     |
| C <sub>11</sub> H <sub>11</sub> O <sub>7</sub> Cl              | 290.0193      |                                   | ✓                  | ✓                  |                | Lavonen et al. (2013), Zhang et al. (2014), Phungsai et al. (2018)  |
| C <sub>17</sub> H <sub>23</sub> O <sub>2</sub> Cl              | 294.1387      |                                   |                    | ✓                  | ✓              |                                                                     |
| C <sub>13</sub> H <sub>11</sub> O <sub>6</sub> Cl              | 298.0244      | ✓                                 | ✓                  |                    |                | Lavonen et al. (2013), Andersson et al. (2021)                      |
| C <sub>13</sub> H <sub>21</sub> OCl <sub>3</sub>               | 298.0658      | ✓                                 | ✓                  |                    |                |                                                                     |
| C <sub>12</sub> H <sub>13</sub> O <sub>7</sub> Cl              | 304.0350      |                                   | ✓                  | ✓                  |                | Lavonen et al. (2013), Zhang et al. (2014), Andersson et al. (2021) |
| C <sub>10</sub> H <sub>8</sub> O <sub>7</sub> Cl <sub>2</sub>  | 309.9647      |                                   | ✓                  | ✓                  |                | Lavonen et al. (2013), Zhang et al. (2014)                          |
| C <sub>10</sub> H <sub>19</sub> O <sub>9</sub> Cl              | 318.0718      | ✓                                 | ✓                  |                    |                |                                                                     |
| C <sub>11</sub> H <sub>23</sub> O <sub>8</sub> Cl              | 318.1081      |                                   | ✓                  | ✓                  |                |                                                                     |
| C <sub>12</sub> H <sub>15</sub> O <sub>8</sub> Cl              | 322.0455      |                                   | ✓                  | ✓                  |                | Lavonen et al. (2013), Zhang et al. (2014)                          |
| C <sub>12</sub> H <sub>17</sub> O <sub>8</sub> Cl              | 324.0612      | ✓                                 | ✓                  |                    |                | Lavonen et al. (2013)                                               |
| C <sub>15</sub> H <sub>25</sub> OCl <sub>3</sub>               | 326.0971      | ✓                                 | ✓                  |                    |                |                                                                     |
| C <sub>16</sub> H <sub>21</sub> O <sub>5</sub> Cl              | 328.1078      |                                   |                    | ✓                  | ✓              | Lavonen et al. (2013)                                               |
| C <sub>15</sub> H <sub>27</sub> OCl <sub>3</sub>               | 328.1127      | ✓                                 | ✓                  |                    |                |                                                                     |
| C <sub>9</sub> H <sub>8</sub> O <sub>9</sub> Cl <sub>2</sub>   | 329.9545      | ✓                                 | ✓                  |                    |                |                                                                     |
| C <sub>12</sub> H <sub>9</sub> O <sub>9</sub> Cl               | 331.9935      |                                   | ✓                  |                    | ✓              | Lavonen et al. (2013), Zhang et al. (2014)                          |
| C <sub>14</sub> H <sub>27</sub> O <sub>2</sub> Cl <sub>3</sub> | 332.1077      |                                   | ✓                  |                    | ✓              |                                                                     |
| C <sub>12</sub> H <sub>25</sub> O <sub>8</sub> Cl              | 332.1238      |                                   | ✓                  | ✓                  |                |                                                                     |
| C <sub>10</sub> H <sub>19</sub> O <sub>10</sub> Cl             | 334.0667      |                                   | ✓                  |                    | ✓              |                                                                     |
| C <sub>15</sub> H <sub>20</sub> O <sub>4</sub> Cl <sub>2</sub> | 334.0739      |                                   |                    | ✓                  | ✓              |                                                                     |
| C <sub>17</sub> H <sub>34</sub> O <sub>2</sub> Cl <sub>2</sub> | 340.1936      | ✓                                 | ✓                  |                    |                |                                                                     |
| C <sub>14</sub> H <sub>23</sub> O <sub>3</sub> Cl <sub>3</sub> | 344.0713      |                                   | ✓                  |                    | ✓              |                                                                     |
| C <sub>12</sub> H <sub>25</sub> O <sub>9</sub> Cl              | 348.1187      | ✓                                 | ✓                  |                    |                |                                                                     |
| C <sub>13</sub> H <sub>14</sub> O <sub>7</sub> Cl <sub>2</sub> | 352.0117      |                                   | ✓                  | ✓                  |                | Lavonen et al. (2013), Zhang et al. (2014), Andersson et al. (2021) |
| C <sub>11</sub> H <sub>22</sub> O <sub>8</sub> Cl <sub>2</sub> | 352.0692      |                                   | ✓                  | ✓                  |                |                                                                     |
| C <sub>16</sub> H <sub>31</sub> O <sub>2</sub> Cl <sub>3</sub> | 360.1390      | ✓                                 | ✓                  |                    |                |                                                                     |
| C <sub>15</sub> H <sub>19</sub> O <sub>8</sub> Cl              | 362.0768      |                                   | ✓                  | ✓                  |                | Lavonen et al. (2013), Zhang et al. (2014), Andersson et al. (2021) |
| C <sub>15</sub> H <sub>29</sub> O <sub>3</sub> Cl <sub>3</sub> | 362.1182      |                                   | ✓                  | ✓                  |                |                                                                     |
| C <sub>14</sub> H <sub>19</sub> O <sub>9</sub> Cl              | 366.0718      |                                   | ✓                  | ✓                  |                | Lavonen et al. (2013), Zhang et al. (2014)                          |
| C <sub>17</sub> H <sub>17</sub> O <sub>7</sub> Cl              | 368.0663      |                                   | ✓                  | ✓                  |                | Lavonen et al. (2013), Zhang et al. (2014), Andersson et al. (2021) |
| C <sub>16</sub> H <sub>29</sub> O <sub>7</sub> Cl              | 368.1602      | ✓                                 | ✓                  |                    |                |                                                                     |
| C <sub>14</sub> H <sub>17</sub> O <sub>5</sub> Cl <sub>3</sub> | 370.0142      |                                   |                    | ✓                  | ✓              |                                                                     |
| C <sub>16</sub> H <sub>29</sub> O <sub>3</sub> Cl <sub>3</sub> | 374.1182      | ✓                                 | ✓                  |                    |                |                                                                     |



| DBP formula                                                     | Theo. MW (Da) | Presence(s) of DBPs in this study |                    |                    |                | Also reported in reference(s)                                       |
|-----------------------------------------------------------------|---------------|-----------------------------------|--------------------|--------------------|----------------|---------------------------------------------------------------------|
|                                                                 |               | RW-Cl <sub>2</sub>                | CW-Cl <sub>2</sub> | FW-Cl <sub>2</sub> | Finished water |                                                                     |
| C <sub>15</sub> H <sub>27</sub> O <sub>4</sub> Cl <sub>3</sub>  | 376.0975      |                                   | ✓                  |                    | ✓              |                                                                     |
| C <sub>16</sub> H <sub>31</sub> O <sub>3</sub> Cl <sub>3</sub>  | 376.1339      |                                   | ✓                  |                    | ✓              |                                                                     |
| C <sub>17</sub> H <sub>27</sub> O <sub>7</sub> Cl               | 378.1445      | ✓                                 |                    | ✓                  |                | Lavonen et al. (2013)                                               |
| C <sub>19</sub> H <sub>25</sub> O <sub>6</sub> Cl               | 384.1340      | ✓                                 |                    | ✓                  |                | Lavonen et al. (2013), Zhang et al. (2014)                          |
| C <sub>17</sub> H <sub>33</sub> O <sub>3</sub> Cl <sub>3</sub>  | 390.1495      |                                   | ✓                  |                    | ✓              |                                                                     |
| C <sub>17</sub> H <sub>20</sub> O <sub>7</sub> Cl <sub>2</sub>  | 406.0586      |                                   | ✓                  | ✓                  |                | Lavonen et al. (2013), Zhang et al. (2014)                          |
| C <sub>15</sub> H <sub>31</sub> O <sub>10</sub> Cl              | 406.1606      |                                   | ✓                  | ✓                  |                |                                                                     |
| C <sub>18</sub> H <sub>29</sub> O <sub>8</sub> Cl               | 408.1551      | ✓                                 | ✓                  |                    |                | Lavonen et al. (2013)                                               |
| C <sub>12</sub> H <sub>20</sub> O <sub>11</sub> Cl <sub>2</sub> | 410.0383      | ✓                                 |                    |                    | ✓              |                                                                     |
| C <sub>19</sub> H <sub>35</sub> O <sub>3</sub> Cl <sub>3</sub>  | 416.1652      |                                   | ✓                  | ✓                  |                |                                                                     |
| C <sub>23</sub> H <sub>23</sub> OCl <sub>3</sub>                | 420.0814      |                                   | ✓                  | ✓                  |                |                                                                     |
| C <sub>18</sub> H <sub>35</sub> O <sub>4</sub> Cl <sub>3</sub>  | 420.1601      |                                   | ✓                  |                    | ✓              |                                                                     |
| C <sub>16</sub> H <sub>16</sub> O <sub>9</sub> Cl <sub>2</sub>  | 422.0171      |                                   | ✓                  | ✓                  |                | Lavonen et al. (2013), Zhang et al. (2014), Andersson et al. (2021) |
| C <sub>19</sub> H <sub>33</sub> O <sub>4</sub> Cl <sub>3</sub>  | 430.1444      | ✓                                 | ✓                  |                    |                |                                                                     |
| C <sub>13</sub> H <sub>19</sub> O <sub>14</sub> Cl              | 434.0463      |                                   | ✓                  |                    | ✓              |                                                                     |
| C <sub>18</sub> H <sub>23</sub> O <sub>10</sub> Cl              | 434.0980      |                                   | ✓                  | ✓                  |                | Lavonen et al. (2013), Zhang et al. (2014)                          |
| C <sub>26</sub> H <sub>26</sub> O <sub>3</sub> Cl <sub>2</sub>  | 456.1259      | ✓                                 | ✓                  |                    |                |                                                                     |
| C <sub>24</sub> H <sub>24</sub> O <sub>5</sub> Cl <sub>2</sub>  | 462.1001      |                                   |                    | ✓                  | ✓              |                                                                     |
| C <sub>26</sub> H <sub>26</sub> O <sub>4</sub> Cl <sub>2</sub>  | 472.1208      |                                   | ✓                  | ✓                  |                |                                                                     |
| C <sub>21</sub> H <sub>35</sub> O <sub>5</sub> Cl <sub>3</sub>  | 472.1550      | ✓                                 |                    | ✓                  |                |                                                                     |
| C <sub>22</sub> H <sub>35</sub> O <sub>5</sub> Cl <sub>3</sub>  | 484.1550      |                                   | ✓                  | ✓                  |                |                                                                     |
| C <sub>21</sub> H <sub>33</sub> O <sub>6</sub> Cl <sub>3</sub>  | 486.1343      | ✓                                 |                    | ✓                  |                |                                                                     |
| C <sub>21</sub> H <sub>29</sub> O <sub>7</sub> Cl <sub>3</sub>  | 498.0979      |                                   |                    | ✓                  | ✓              |                                                                     |
| C <sub>2</sub> H <sub>2</sub> O <sub>2</sub> Cl <sub>2</sub>    | 127.9432      |                                   | ✓                  |                    |                |                                                                     |
| C <sub>4</sub> H <sub>6</sub> OCl <sub>2</sub>                  | 139.9796      | ✓                                 |                    |                    |                |                                                                     |
| C <sub>5</sub> H <sub>8</sub> OCl <sub>2</sub>                  | 153.9952      | ✓                                 |                    |                    |                |                                                                     |
| C <sub>8</sub> H <sub>9</sub> O <sub>2</sub> Cl                 | 172.0291      |                                   |                    | ✓                  |                |                                                                     |
| C <sub>7</sub> H <sub>7</sub> O <sub>3</sub> Cl                 | 174.0084      |                                   |                    |                    | ✓              |                                                                     |
| C <sub>5</sub> H <sub>6</sub> O <sub>3</sub> Cl <sub>2</sub>    | 183.9694      |                                   |                    |                    | ✓              |                                                                     |
| C <sub>6</sub> H <sub>10</sub> O <sub>2</sub> Cl <sub>2</sub>   | 184.0058      | ✓                                 |                    |                    |                |                                                                     |
| C <sub>7</sub> H <sub>3</sub> O <sub>4</sub> Cl                 | 185.9720      |                                   |                    |                    | ✓              |                                                                     |
| C <sub>11</sub> H <sub>9</sub> OCl                              | 192.0342      | ✓                                 |                    |                    |                |                                                                     |
| C <sub>11</sub> H <sub>13</sub> OCl                             | 196.0655      | ✓                                 |                    |                    |                |                                                                     |
| C <sub>11</sub> H <sub>9</sub> O <sub>2</sub> Cl                | 208.0291      | ✓                                 |                    |                    |                |                                                                     |
| C <sub>9</sub> H <sub>7</sub> O <sub>4</sub> Cl                 | 214.0033      | ✓                                 |                    |                    |                | Gonsior et al. (2014)                                               |
| C <sub>7</sub> H <sub>3</sub> O <sub>2</sub> Cl <sub>3</sub>    | 223.9199      |                                   | ✓                  |                    |                |                                                                     |
| C <sub>8</sub> H <sub>9</sub> OCl <sub>3</sub>                  | 225.9719      |                                   |                    |                    | ✓              |                                                                     |
| C <sub>14</sub> H <sub>9</sub> OCl                              | 228.0342      |                                   | ✓                  |                    |                |                                                                     |

| DBP formula                                                    | Theo. MW (Da) | Presence(s) of DBPs in this study |                    |                    |                | Also reported in reference(s)                                       |
|----------------------------------------------------------------|---------------|-----------------------------------|--------------------|--------------------|----------------|---------------------------------------------------------------------|
|                                                                |               | RW-Cl <sub>2</sub>                | CW-Cl <sub>2</sub> | FW-Cl <sub>2</sub> | Finished water |                                                                     |
| C <sub>8</sub> H <sub>5</sub> O <sub>6</sub> Cl                | 231.9775      |                                   |                    |                    | ✓              |                                                                     |
| C <sub>10</sub> H <sub>15</sub> O <sub>4</sub> Cl              | 234.0659      |                                   |                    |                    | ✓              |                                                                     |
| C <sub>8</sub> H <sub>8</sub> O <sub>4</sub> Cl <sub>2</sub>   | 237.9800      |                                   |                    |                    | ✓              |                                                                     |
| C <sub>14</sub> H <sub>19</sub> OCl                            | 238.1124      |                                   |                    | ✓                  |                |                                                                     |
| C <sub>7</sub> H <sub>10</sub> O <sub>5</sub> Cl <sub>2</sub>  | 243.9905      |                                   |                    |                    | ✓              |                                                                     |
| C <sub>9</sub> H <sub>9</sub> O <sub>6</sub> Cl                | 248.0088      |                                   |                    |                    | ✓              | Lavonen et al. (2013), Zhang et al. (2014)                          |
| C <sub>10</sub> H <sub>13</sub> O <sub>5</sub> Cl              | 248.0452      | ✓                                 |                    |                    |                | Zhang et al. (2014)                                                 |
| C <sub>11</sub> H <sub>17</sub> O <sub>4</sub> Cl              | 248.0815      |                                   |                    |                    | ✓              |                                                                     |
| C <sub>8</sub> H <sub>6</sub> O <sub>5</sub> Cl <sub>2</sub>   | 251.9592      |                                   |                    |                    | ✓              |                                                                     |
| C <sub>15</sub> H <sub>21</sub> OCl                            | 252.1281      |                                   |                    | ✓                  |                |                                                                     |
| C <sub>13</sub> H <sub>16</sub> OCl <sub>2</sub>               | 258.0578      |                                   |                    | ✓                  |                |                                                                     |
| C <sub>10</sub> H <sub>6</sub> O <sub>4</sub> Cl <sub>2</sub>  | 259.9643      |                                   | ✓                  |                    |                | Zhang et al. (2014)                                                 |
| C <sub>10</sub> H <sub>9</sub> O <sub>6</sub> Cl               | 260.0088      |                                   | ✓                  |                    |                | Lavonen et al. (2013), Zhang et al. (2014)                          |
| C <sub>7</sub> H <sub>13</sub> O <sub>8</sub> Cl               | 260.0299      | ✓                                 |                    |                    |                |                                                                     |
| C <sub>14</sub> H <sub>25</sub> O <sub>2</sub> Cl              | 260.1543      |                                   | ✓                  |                    |                |                                                                     |
| C <sub>13</sub> H <sub>22</sub> OCl <sub>2</sub>               | 264.1048      |                                   | ✓                  |                    |                |                                                                     |
| C <sub>9</sub> H <sub>8</sub> O <sub>5</sub> Cl <sub>2</sub>   | 265.9749      |                                   |                    |                    | ✓              | Zhang et al. (2014)                                                 |
| C <sub>8</sub> H <sub>6</sub> O <sub>6</sub> Cl <sub>2</sub>   | 267.9541      |                                   |                    |                    | ✓              | Lavonen et al. (2013), Zhang et al. (2014)                          |
| C <sub>8</sub> H <sub>9</sub> O <sub>8</sub> Cl                | 267.9986      |                                   |                    |                    | ✓              |                                                                     |
| C <sub>14</sub> H <sub>21</sub> O <sub>3</sub> Cl              | 272.1179      |                                   |                    |                    | ✓              |                                                                     |
| C <sub>10</sub> H <sub>9</sub> O <sub>7</sub> Cl               | 276.0037      |                                   |                    | ✓                  |                | Lavonen et al. (2013), Zhang et al. (2014), Phungsai et al. (2018)  |
| C <sub>10</sub> H <sub>19</sub> O <sub>2</sub> Cl <sub>3</sub> | 276.0451      |                                   |                    |                    | ✓              |                                                                     |
| C <sub>15</sub> H <sub>13</sub> O <sub>3</sub> Cl              | 276.0553      |                                   | ✓                  |                    |                |                                                                     |
| C <sub>12</sub> H <sub>17</sub> O <sub>5</sub> Cl              | 276.0765      |                                   |                    | ✓                  |                | Lavonen et al. (2013), Zhang et al. (2014)                          |
| C <sub>13</sub> H <sub>21</sub> O <sub>4</sub> Cl              | 276.1128      |                                   |                    | ✓                  |                | Lavonen et al. (2013)                                               |
| C <sub>10</sub> H <sub>11</sub> O <sub>7</sub> Cl              | 278.0193      |                                   |                    |                    | ✓              | Lavonen et al. (2013), Phungsai et al. (2018)                       |
| C <sub>17</sub> H <sub>23</sub> OCl                            | 278.1437      |                                   |                    | ✓                  |                |                                                                     |
| C <sub>14</sub> H <sub>26</sub> OCl <sub>2</sub>               | 280.1361      |                                   | ✓                  |                    |                |                                                                     |
| C <sub>17</sub> H <sub>11</sub> O <sub>2</sub> Cl              | 282.0448      |                                   |                    |                    | ✓              |                                                                     |
| C <sub>11</sub> H <sub>5</sub> O <sub>7</sub> Cl               | 283.9724      | ✓                                 |                    |                    |                |                                                                     |
| C <sub>11</sub> H <sub>15</sub> O <sub>2</sub> Cl <sub>3</sub> | 284.0138      |                                   |                    |                    | ✓              |                                                                     |
| C <sub>12</sub> H <sub>22</sub> O <sub>3</sub> Cl <sub>2</sub> | 284.0946      |                                   | ✓                  |                    |                |                                                                     |
| C <sub>12</sub> H <sub>11</sub> O <sub>6</sub> Cl              | 286.0244      |                                   | ✓                  |                    |                | Lavonen et al. (2013), Zhang et al. (2014), Andersson et al. (2021) |
| C <sub>10</sub> H <sub>15</sub> O <sub>3</sub> Cl <sub>3</sub> | 288.0087      |                                   |                    |                    | ✓              |                                                                     |
| C <sub>8</sub> H <sub>13</sub> O <sub>9</sub> Cl               | 288.0248      | ✓                                 |                    |                    |                |                                                                     |
| C <sub>11</sub> H <sub>19</sub> O <sub>2</sub> Cl <sub>3</sub> | 288.0451      |                                   | ✓                  |                    |                |                                                                     |
| C <sub>13</sub> H <sub>17</sub> O <sub>5</sub> Cl              | 288.0765      |                                   |                    |                    | ✓              | Lavonen et al. (2013), Zhang et al. (2014)                          |
| C <sub>7</sub> H <sub>5</sub> O <sub>6</sub> Cl <sub>3</sub>   | 289.9152      |                                   | ✓                  |                    |                |                                                                     |

| DBP formula                                                    | Theo. MW (Da) | Presence(s) of DBPs in this study |                    |                    |                | Also reported in reference(s)                                                               |
|----------------------------------------------------------------|---------------|-----------------------------------|--------------------|--------------------|----------------|---------------------------------------------------------------------------------------------|
|                                                                |               | RW-Cl <sub>2</sub>                | CW-Cl <sub>2</sub> | FW-Cl <sub>2</sub> | Finished water |                                                                                             |
| C <sub>11</sub> H <sub>21</sub> O <sub>2</sub> Cl <sub>3</sub> | 290.0607      |                                   | ✓                  |                    |                |                                                                                             |
| C <sub>15</sub> H <sub>27</sub> O <sub>3</sub> Cl              | 290.1649      |                                   | ✓                  |                    |                |                                                                                             |
| C <sub>8</sub> H <sub>17</sub> O <sub>9</sub> Cl               | 292.0561      |                                   | ✓                  |                    |                |                                                                                             |
| C <sub>16</sub> H <sub>17</sub> O <sub>3</sub> Cl              | 292.0866      |                                   | ✓                  |                    |                |                                                                                             |
| C <sub>12</sub> H <sub>13</sub> O <sub>2</sub> Cl <sub>3</sub> | 293.9981      |                                   |                    | ✓                  |                |                                                                                             |
| C <sub>10</sub> H <sub>11</sub> O <sub>8</sub> Cl              | 294.0142      |                                   | ✓                  |                    |                | Zhang et al. (2014)                                                                         |
| C <sub>15</sub> H <sub>28</sub> OCl <sub>2</sub>               | 294.1517      |                                   | ✓                  |                    |                |                                                                                             |
| C <sub>13</sub> H <sub>9</sub> O <sub>6</sub> Cl               | 296.0088      |                                   | ✓                  |                    |                | Lavonen et al. (2013), Zhang et al. (2014)                                                  |
| C <sub>8</sub> H <sub>4</sub> O <sub>8</sub> Cl <sub>2</sub>   | 297.9283      |                                   | ✓                  |                    |                |                                                                                             |
| C <sub>10</sub> H <sub>12</sub> O <sub>6</sub> Cl <sub>2</sub> | 298.0011      |                                   |                    |                    | ✓              | Lavonen et al. (2013), Zhang et al. (2014)                                                  |
| C <sub>15</sub> H <sub>20</sub> O <sub>2</sub> Cl <sub>2</sub> | 302.0840      |                                   |                    | ✓                  |                |                                                                                             |
| C <sub>18</sub> H <sub>19</sub> O <sub>2</sub> Cl              | 302.1074      |                                   |                    | ✓                  |                |                                                                                             |
| C <sub>16</sub> H <sub>24</sub> OCl <sub>2</sub>               | 302.1204      |                                   |                    | ✓                  |                |                                                                                             |
| C <sub>11</sub> H <sub>22</sub> O <sub>5</sub> Cl <sub>2</sub> | 304.0844      |                                   |                    |                    | ✓              |                                                                                             |
| C <sub>14</sub> H <sub>21</sub> O <sub>5</sub> Cl              | 304.1078      |                                   | ✓                  |                    |                | Lavonen et al. (2013), Zhang et al. (2014)                                                  |
| C <sub>11</sub> H <sub>8</sub> O <sub>6</sub> Cl <sub>2</sub>  | 305.9698      |                                   | ✓                  |                    |                | Lavonen et al. (2013), Zhang et al. (2014)                                                  |
| C <sub>11</sub> H <sub>11</sub> O <sub>8</sub> Cl              | 306.0142      |                                   | ✓                  |                    |                | Lavonen et al. (2013), Zhang et al. (2014)                                                  |
| C <sub>16</sub> H <sub>28</sub> OCl <sub>2</sub>               | 306.1517      |                                   | ✓                  |                    |                |                                                                                             |
| C <sub>19</sub> H <sub>29</sub> OCl                            | 308.1907      |                                   |                    | ✓                  |                |                                                                                             |
| C <sub>14</sub> H <sub>21</sub> OCl <sub>3</sub>               | 310.0658      |                                   | ✓                  |                    |                |                                                                                             |
| C <sub>12</sub> H <sub>2</sub> O <sub>6</sub> Cl <sub>2</sub>  | 311.9228      |                                   |                    | ✓                  |                |                                                                                             |
| C <sub>13</sub> H <sub>22</sub> O <sub>4</sub> Cl <sub>2</sub> | 312.0895      |                                   |                    |                    | ✓              |                                                                                             |
| C <sub>16</sub> H <sub>21</sub> O <sub>4</sub> Cl              | 312.1128      |                                   |                    | ✓                  |                | Lavonen et al. (2013), Zhang et al. (2014)                                                  |
| C <sub>17</sub> H <sub>25</sub> O <sub>3</sub> Cl              | 312.1492      |                                   |                    | ✓                  |                |                                                                                             |
| C <sub>12</sub> H <sub>23</sub> O <sub>7</sub> Cl              | 314.1132      |                                   | ✓                  |                    |                |                                                                                             |
| C <sub>13</sub> H <sub>13</sub> O <sub>7</sub> Cl              | 316.0350      |                                   | ✓                  |                    |                | Lavonen et al. (2013), Zhang et al. (2014), Andersson et al. (2021)                         |
| C <sub>18</sub> H <sub>14</sub> OCl <sub>2</sub>               | 316.0422      |                                   | ✓                  |                    |                |                                                                                             |
| C <sub>13</sub> H <sub>23</sub> O <sub>2</sub> Cl <sub>3</sub> | 316.0764      |                                   | ✓                  |                    |                |                                                                                             |
| C <sub>14</sub> H <sub>27</sub> OCl <sub>3</sub>               | 316.1127      |                                   | ✓                  |                    |                |                                                                                             |
| C <sub>12</sub> H <sub>25</sub> O <sub>7</sub> Cl              | 316.1289      |                                   |                    | ✓                  |                |                                                                                             |
| C <sub>9</sub> H <sub>15</sub> O <sub>10</sub> Cl              | 318.0354      |                                   |                    |                    | ✓              |                                                                                             |
| C <sub>13</sub> H <sub>15</sub> O <sub>7</sub> Cl              | 318.0506      |                                   | ✓                  |                    |                | Lavonen et al. (2013), Zhang et al. (2014), Phungsai et al. (2018), Andersson et al. (2021) |
| C <sub>13</sub> H <sub>25</sub> O <sub>2</sub> Cl <sub>3</sub> | 318.0920      |                                   | ✓                  |                    |                |                                                                                             |
| C <sub>8</sub> H <sub>7</sub> O <sub>7</sub> Cl <sub>3</sub>   | 319.9257      | ✓                                 |                    |                    |                |                                                                                             |
| C <sub>11</sub> H <sub>19</sub> O <sub>4</sub> Cl <sub>3</sub> | 320.0349      |                                   |                    |                    | ✓              |                                                                                             |
| C <sub>12</sub> H <sub>23</sub> O <sub>3</sub> Cl <sub>3</sub> | 320.0713      |                                   |                    |                    | ✓              |                                                                                             |
| C <sub>10</sub> H <sub>4</sub> O <sub>8</sub> Cl <sub>2</sub>  | 321.9283      |                                   |                    |                    | ✓              |                                                                                             |

| DBP formula                                                    | Theo. MW (Da) | Presence(s) of DBPs in this study |                    |                    |                | Also reported in reference(s)                                       |
|----------------------------------------------------------------|---------------|-----------------------------------|--------------------|--------------------|----------------|---------------------------------------------------------------------|
|                                                                |               | RW-Cl <sub>2</sub>                | CW-Cl <sub>2</sub> | FW-Cl <sub>2</sub> | Finished water |                                                                     |
| C <sub>11</sub> H <sub>8</sub> O <sub>7</sub> Cl <sub>2</sub>  | 321.9647      | ✓                                 |                    |                    |                | Lavonen et al. (2013), Zhang et al. (2014)                          |
| C <sub>18</sub> H <sub>25</sub> O <sub>3</sub> Cl              | 324.1492      |                                   |                    | ✓                  |                |                                                                     |
| C <sub>16</sub> H <sub>30</sub> O <sub>2</sub> Cl <sub>2</sub> | 324.1623      |                                   | ✓                  |                    |                |                                                                     |
| C <sub>10</sub> H <sub>8</sub> O <sub>8</sub> Cl <sub>2</sub>  | 325.9596      |                                   |                    |                    | ✓              |                                                                     |
| C <sub>14</sub> H <sub>21</sub> O <sub>2</sub> Cl <sub>3</sub> | 326.0607      |                                   | ✓                  |                    |                |                                                                     |
| C <sub>18</sub> H <sub>27</sub> O <sub>3</sub> Cl              | 326.1649      |                                   |                    | ✓                  |                |                                                                     |
| C <sub>16</sub> H <sub>32</sub> O <sub>2</sub> Cl <sub>2</sub> | 326.1779      |                                   | ✓                  |                    |                |                                                                     |
| C <sub>12</sub> H <sub>5</sub> O <sub>9</sub> Cl               | 327.9622      |                                   | ✓                  |                    |                | Lavonen et al. (2013), Zhang et al. (2014)                          |
| C <sub>14</sub> H <sub>25</sub> O <sub>2</sub> Cl <sub>3</sub> | 330.0920      |                                   | ✓                  |                    |                |                                                                     |
| C <sub>13</sub> H <sub>23</sub> O <sub>3</sub> Cl <sub>3</sub> | 332.0713      |                                   | ✓                  |                    |                |                                                                     |
| C <sub>19</sub> H <sub>18</sub> OCl <sub>2</sub>               | 332.0735      |                                   |                    |                    | ✓              |                                                                     |
| C <sub>12</sub> H <sub>10</sub> O <sub>7</sub> Cl <sub>2</sub> | 335.9804      |                                   | ✓                  |                    |                | Lavonen et al. (2013), Zhang et al. (2014), Andersson et al. (2021) |
| C <sub>12</sub> H <sub>13</sub> O <sub>9</sub> Cl              | 336.0248      |                                   |                    | ✓                  |                | Lavonen et al. (2013), Zhang et al. (2014)                          |
| C <sub>17</sub> H <sub>30</sub> O <sub>2</sub> Cl <sub>2</sub> | 336.1623      |                                   | ✓                  |                    |                |                                                                     |
| C <sub>11</sub> H <sub>10</sub> O <sub>8</sub> Cl <sub>2</sub> | 339.9753      |                                   |                    |                    | ✓              | Lavonen et al. (2013), Zhang et al. (2014)                          |
| C <sub>12</sub> H <sub>14</sub> O <sub>7</sub> Cl <sub>2</sub> | 340.0117      |                                   |                    |                    | ✓              | Lavonen et al. (2013), Zhang et al. (2014), Andersson et al. (2021) |
| C <sub>11</sub> H <sub>13</sub> O <sub>10</sub> Cl             | 340.0197      |                                   |                    | ✓                  |                |                                                                     |
| C <sub>10</sub> H <sub>19</sub> O <sub>6</sub> Cl <sub>3</sub> | 340.0247      |                                   | ✓                  |                    |                |                                                                     |
| C <sub>18</sub> H <sub>25</sub> O <sub>4</sub> Cl              | 340.1441      |                                   |                    | ✓                  |                | Lavonen et al. (2013)                                               |
| C <sub>16</sub> H <sub>30</sub> O <sub>3</sub> Cl <sub>2</sub> | 340.1572      |                                   | ✓                  |                    |                |                                                                     |
| C <sub>16</sub> H <sub>19</sub> O <sub>6</sub> Cl              | 342.0870      |                                   |                    |                    | ✓              | Lavonen et al. (2013), Zhang et al. (2014), Andersson et al. (2021) |
| C <sub>16</sub> H <sub>32</sub> O <sub>3</sub> Cl <sub>2</sub> | 342.1729      |                                   | ✓                  |                    |                |                                                                     |
| C <sub>17</sub> H <sub>25</sub> O <sub>5</sub> Cl              | 344.1391      |                                   |                    | ✓                  |                | Lavonen et al. (2013)                                               |
| C <sub>14</sub> H <sub>15</sub> O <sub>8</sub> Cl              | 346.0455      |                                   | ✓                  |                    |                | Lavonen et al. (2013), Zhang et al. (2014), Andersson et al. (2021) |
| C <sub>15</sub> H <sub>19</sub> O <sub>7</sub> Cl              | 346.0819      |                                   | ✓                  |                    |                | Lavonen et al. (2013), Zhang et al. (2014), Andersson et al. (2021) |
| C <sub>14</sub> H <sub>25</sub> O <sub>3</sub> Cl <sub>3</sub> | 346.0869      |                                   | ✓                  |                    |                |                                                                     |
| C <sub>15</sub> H <sub>29</sub> O <sub>2</sub> Cl <sub>3</sub> | 346.1233      |                                   | ✓                  |                    |                |                                                                     |
| C <sub>19</sub> H <sub>34</sub> OCl <sub>2</sub>               | 348.1987      |                                   | ✓                  |                    |                |                                                                     |
| C <sub>12</sub> H <sub>10</sub> O <sub>8</sub> Cl <sub>2</sub> | 351.9753      |                                   | ✓                  |                    |                | Lavonen et al. (2013), Zhang et al. (2014), Andersson et al. (2021) |
| C <sub>12</sub> H <sub>23</sub> O <sub>5</sub> Cl <sub>3</sub> | 352.0611      |                                   |                    |                    | ✓              |                                                                     |
| C <sub>15</sub> H <sub>25</sub> O <sub>7</sub> Cl              | 352.1289      | ✓                                 |                    |                    |                | Lavonen et al. (2013)                                               |
| C <sub>14</sub> H <sub>17</sub> O <sub>4</sub> Cl <sub>3</sub> | 354.0192      |                                   |                    | ✓                  |                |                                                                     |
| C <sub>13</sub> H <sub>2</sub> O <sub>8</sub> Cl <sub>2</sub>  | 355.9127      | ✓                                 |                    |                    |                |                                                                     |
| C <sub>9</sub> H <sub>18</sub> O <sub>10</sub> Cl <sub>2</sub> | 356.0277      |                                   | ✓                  |                    |                |                                                                     |
| C <sub>15</sub> H <sub>13</sub> O <sub>8</sub> Cl              | 356.0299      |                                   | ✓                  |                    |                | Lavonen et al. (2013), Zhang et al. (2014), Andersson et al. (2021) |
| C <sub>18</sub> H <sub>25</sub> O <sub>5</sub> Cl              | 356.1391      |                                   |                    | ✓                  |                | Lavonen et al. (2013)                                               |
| C <sub>15</sub> H <sub>25</sub> O <sub>3</sub> Cl <sub>3</sub> | 358.0869      |                                   | ✓                  |                    |                |                                                                     |

| DBP formula                                                     | Theo. MW (Da) | Presence(s) of DBPs in this study |                    |                    |                | Also reported in reference(s)                                       |
|-----------------------------------------------------------------|---------------|-----------------------------------|--------------------|--------------------|----------------|---------------------------------------------------------------------|
|                                                                 |               | RW-Cl <sub>2</sub>                | CW-Cl <sub>2</sub> | FW-Cl <sub>2</sub> | Finished water |                                                                     |
| C <sub>14</sub> H <sub>27</sub> O <sub>8</sub> Cl               | 358.1394      |                                   |                    | ✓                  |                |                                                                     |
| C <sub>19</sub> H <sub>30</sub> O <sub>2</sub> Cl <sub>2</sub>  | 360.1623      |                                   |                    | ✓                  |                |                                                                     |
| C <sub>14</sub> H <sub>25</sub> O <sub>4</sub> Cl <sub>3</sub>  | 362.0818      |                                   | ✓                  |                    |                |                                                                     |
| C <sub>14</sub> H <sub>14</sub> O <sub>7</sub> Cl <sub>2</sub>  | 364.0117      |                                   | ✓                  |                    |                | Lavonen et al. (2013), Zhang et al. (2014), Andersson et al. (2021) |
| C <sub>16</sub> H <sub>19</sub> O <sub>3</sub> Cl <sub>3</sub>  | 364.0400      |                                   |                    | ✓                  |                |                                                                     |
| C <sub>16</sub> H <sub>21</sub> O <sub>3</sub> Cl <sub>3</sub>  | 366.0556      |                                   |                    | ✓                  |                |                                                                     |
| C <sub>16</sub> H <sub>27</sub> O <sub>7</sub> Cl               | 366.1445      |                                   |                    | ✓                  |                | Lavonen et al. (2013)                                               |
| C <sub>17</sub> H <sub>30</sub> O <sub>4</sub> Cl <sub>2</sub>  | 368.1521      |                                   | ✓                  |                    |                |                                                                     |
| C <sub>20</sub> H <sub>29</sub> O <sub>4</sub> Cl               | 368.1754      |                                   |                    |                    | ✓              | Lavonen et al. (2013)                                               |
| C <sub>16</sub> H <sub>17</sub> O <sub>8</sub> Cl               | 372.0612      |                                   | ✓                  |                    |                | Lavonen et al. (2013), Zhang et al. (2014), Andersson et al. (2021) |
| C <sub>18</sub> H <sub>27</sub> O <sub>6</sub> Cl               | 374.1496      |                                   |                    | ✓                  |                | Lavonen et al. (2013), Andersson et al. (2021)                      |
| C <sub>11</sub> H <sub>22</sub> O <sub>10</sub> Cl <sub>2</sub> | 384.0590      |                                   | ✓                  |                    |                |                                                                     |
| C <sub>17</sub> H <sub>29</sub> O <sub>3</sub> Cl <sub>3</sub>  | 386.1182      |                                   | ✓                  |                    |                |                                                                     |
| C <sub>19</sub> H <sub>37</sub> OCl <sub>3</sub>                | 386.1910      |                                   | ✓                  |                    |                |                                                                     |
| C <sub>16</sub> H <sub>27</sub> O <sub>4</sub> Cl <sub>3</sub>  | 388.0975      |                                   | ✓                  |                    |                |                                                                     |
| C <sub>17</sub> H <sub>31</sub> O <sub>3</sub> Cl <sub>3</sub>  | 388.1339      |                                   | ✓                  |                    |                |                                                                     |
| C <sub>18</sub> H <sub>35</sub> O <sub>2</sub> Cl <sub>3</sub>  | 388.1703      |                                   | ✓                  |                    |                |                                                                     |
| C <sub>19</sub> H <sub>36</sub> O <sub>4</sub> Cl <sub>2</sub>  | 398.1991      | ✓                                 |                    |                    |                |                                                                     |
| C <sub>20</sub> H <sub>29</sub> O <sub>6</sub> Cl               | 400.1653      |                                   | ✓                  |                    |                | Lavonen et al. (2013)                                               |
| C <sub>17</sub> H <sub>29</sub> O <sub>4</sub> Cl <sub>3</sub>  | 402.1131      |                                   | ✓                  |                    |                |                                                                     |
| C <sub>19</sub> H <sub>37</sub> O <sub>2</sub> Cl <sub>3</sub>  | 402.1859      |                                   | ✓                  |                    |                |                                                                     |
| C <sub>18</sub> H <sub>36</sub> O <sub>5</sub> Cl <sub>2</sub>  | 402.1940      |                                   |                    | ✓                  |                |                                                                     |
| C <sub>17</sub> H <sub>31</sub> O <sub>4</sub> Cl <sub>3</sub>  | 404.1288      |                                   | ✓                  |                    |                |                                                                     |
| C <sub>18</sub> H <sub>35</sub> O <sub>3</sub> Cl <sub>3</sub>  | 404.1652      |                                   | ✓                  |                    |                |                                                                     |
| C <sub>17</sub> H <sub>25</sub> O <sub>5</sub> Cl <sub>3</sub>  | 414.0768      |                                   |                    |                    | ✓              |                                                                     |
| C <sub>19</sub> H <sub>33</sub> O <sub>3</sub> Cl <sub>3</sub>  | 414.1495      |                                   | ✓                  |                    |                |                                                                     |
| C <sub>19</sub> H <sub>37</sub> O <sub>3</sub> Cl <sub>3</sub>  | 418.1808      |                                   | ✓                  |                    |                |                                                                     |
| C <sub>17</sub> H <sub>23</sub> O <sub>10</sub> Cl              | 422.0980      |                                   |                    | ✓                  |                | Lavonen et al. (2013), Zhang et al. (2014)                          |
| C <sub>17</sub> H <sub>19</sub> O <sub>6</sub> Cl <sub>3</sub>  | 424.0247      |                                   |                    | ✓                  |                |                                                                     |
| C <sub>25</sub> H <sub>27</sub> O <sub>4</sub> Cl               | 426.1598      |                                   | ✓                  |                    |                |                                                                     |
| C <sub>18</sub> H <sub>33</sub> O <sub>5</sub> Cl <sub>3</sub>  | 434.1394      |                                   | ✓                  |                    |                |                                                                     |
| C <sub>17</sub> H <sub>33</sub> O <sub>6</sub> Cl <sub>3</sub>  | 438.1343      | ✓                                 |                    |                    |                |                                                                     |
| C <sub>19</sub> H <sub>31</sub> O <sub>9</sub> Cl               | 438.1657      |                                   |                    | ✓                  |                |                                                                     |
| C <sub>18</sub> H <sub>33</sub> O <sub>6</sub> Cl <sub>3</sub>  | 450.1343      |                                   | ✓                  |                    |                |                                                                     |
| C <sub>19</sub> H <sub>29</sub> O <sub>6</sub> Cl <sub>3</sub>  | 458.1030      |                                   |                    |                    | ✓              |                                                                     |
| C <sub>24</sub> H <sub>23</sub> O <sub>7</sub> Cl               | 458.1132      |                                   |                    |                    | ✓              |                                                                     |
| C <sub>25</sub> H <sub>17</sub> O <sub>7</sub> Cl               | 464.0663      |                                   | ✓                  |                    |                |                                                                     |
| C <sub>24</sub> H <sub>17</sub> O <sub>8</sub> Cl               | 468.0612      |                                   | ✓                  |                    |                |                                                                     |

| DBP formula                                                    | Theo. MW (Da) | Presence(s) of DBPs in this study |                    |                    |                | Also reported in reference(s) |
|----------------------------------------------------------------|---------------|-----------------------------------|--------------------|--------------------|----------------|-------------------------------|
|                                                                |               | RW-Cl <sub>2</sub>                | CW-Cl <sub>2</sub> | FW-Cl <sub>2</sub> | Finished water |                               |
| C <sub>19</sub> H <sub>25</sub> O <sub>7</sub> Cl <sub>3</sub> | 470.0666      | ✓                                 |                    |                    |                |                               |
| C <sub>15</sub> H <sub>21</sub> O <sub>15</sub> Cl             | 476.0569      |                                   | ✓                  |                    |                |                               |

## References

- A. Andersson, M. Gonsior, M. Harir, N. Hertkorn, P. Schmitt-Kopplin, L. Powers, H. Kylin, D. Hellström, K. Nilsson, Å. Pettersson, H. Stavklint and D. Bastviken, *Environmental Science: Water Research & Technology*, 2021, 7, 2335-2345.
- M. Gonsior, P. Schmitt-Kopplin, H. Stavklint, S. D. Richardson, N. Hertkorn and D. Bastviken, *Environ Sci Technol*, 2014, 48, 12714-12722.
- E. E. Lavonen, M. Gonsior, L. J. Tranvik, P. Schmitt-Kopplin and S. J. Kohler, *Environ Sci Technol*, 2013, 47, 2264-2271.
- P. Phungsai, F. Kurisu, I. Kasuga and H. Furumai, *Environmental Science & Technology*, 2018, 52, 3392-3401.
- Y. Zhang, W. Chu, D. Yao and D. Yin, *J Environ Sci (China)*, 2017, 58, 322-330.

**Table S5** CHON-DBPs detected in chlorinated samples and finished water in this study. RW-Cl<sub>2</sub>, CW-Cl<sub>2</sub>, and FW-Cl<sub>2</sub> denote chlorinated raw water, chlorinated clarified water, and chlorinated filtered water, respectively.

| DBP formula                                                                    | Theo. MW (Da) | Presence(s) of DBPs in this study |                    |                    |                |
|--------------------------------------------------------------------------------|---------------|-----------------------------------|--------------------|--------------------|----------------|
|                                                                                |               | RW-Cl <sub>2</sub>                | CW-Cl <sub>2</sub> | FW-Cl <sub>2</sub> | Finished water |
| C <sub>12</sub> H <sub>15</sub> ON <sub>2</sub> Cl <sub>3</sub>                | 308.0250      | ✓                                 | ✓                  | ✓                  | ✓              |
| C <sub>14</sub> H <sub>17</sub> O <sub>2</sub> N <sub>2</sub> Cl <sub>3</sub>  | 350.0356      | ✓                                 | ✓                  | ✓                  | ✓              |
| C <sub>12</sub> H <sub>26</sub> O <sub>6</sub> N <sub>2</sub> Cl <sub>2</sub>  | 364.1168      | ✓                                 | ✓                  | ✓                  | ✓              |
| C <sub>15</sub> H <sub>21</sub> O <sub>2</sub> N <sub>2</sub> Cl <sub>3</sub>  | 366.0669      | ✓                                 | ✓                  | ✓                  | ✓              |
| C <sub>12</sub> H <sub>25</sub> O <sub>4</sub> N <sub>2</sub> Cl <sub>3</sub>  | 366.0880      | ✓                                 | ✓                  | ✓                  | ✓              |
| C <sub>16</sub> H <sub>23</sub> O <sub>3</sub> N <sub>2</sub> Cl <sub>3</sub>  | 396.0774      | ✓                                 | ✓                  | ✓                  | ✓              |
| C <sub>11</sub> H <sub>20</sub> O <sub>10</sub> N <sub>2</sub> Cl <sub>2</sub> | 410.0495      | ✓                                 | ✓                  | ✓                  | ✓              |
| C <sub>18</sub> H <sub>25</sub> O <sub>3</sub> N <sub>2</sub> Cl <sub>3</sub>  | 422.0931      | ✓                                 | ✓                  | ✓                  | ✓              |
| C <sub>14</sub> H <sub>27</sub> O <sub>12</sub> N <sub>2</sub> Cl              | 450.1253      | ✓                                 | ✓                  | ✓                  | ✓              |
| C <sub>15</sub> H <sub>31</sub> O <sub>11</sub> N <sub>2</sub> Cl              | 450.1616      | ✓                                 | ✓                  | ✓                  | ✓              |
| C <sub>6</sub> H <sub>6</sub> ON <sub>2</sub> Cl <sub>2</sub>                  | 191.9857      | ✓                                 | ✓                  | ✓                  |                |
| C <sub>7</sub> H <sub>12</sub> O <sub>2</sub> NCl <sub>3</sub>                 | 246.9934      | ✓                                 | ✓                  | ✓                  |                |
| C <sub>11</sub> H <sub>12</sub> ON <sub>2</sub> Cl <sub>2</sub>                | 258.0327      | ✓                                 | ✓                  |                    | ✓              |
| C <sub>9</sub> H <sub>14</sub> O <sub>3</sub> N <sub>2</sub> Cl <sub>2</sub>   | 268.0381      |                                   | ✓                  | ✓                  | ✓              |
| C <sub>9</sub> H <sub>19</sub> ON <sub>2</sub> Cl <sub>3</sub>                 | 276.0563      | ✓                                 | ✓                  | ✓                  |                |
| C <sub>9</sub> H <sub>17</sub> O <sub>2</sub> N <sub>2</sub> Cl <sub>3</sub>   | 290.0356      | ✓                                 | ✓                  | ✓                  |                |
| C <sub>14</sub> H <sub>7</sub> O <sub>4</sub> N <sub>2</sub> Cl                | 302.0094      |                                   | ✓                  | ✓                  | ✓              |
| C <sub>11</sub> H <sub>15</sub> O <sub>2</sub> N <sub>2</sub> Cl <sub>3</sub>  | 312.0199      | ✓                                 | ✓                  | ✓                  |                |
| C <sub>15</sub> H <sub>18</sub> ON <sub>2</sub> Cl <sub>2</sub>                | 312.0796      | ✓                                 | ✓                  | ✓                  |                |
| C <sub>13</sub> H <sub>17</sub> ON <sub>2</sub> Cl <sub>3</sub>                | 322.0406      | ✓                                 | ✓                  | ✓                  |                |
| C <sub>12</sub> H <sub>19</sub> O <sub>2</sub> N <sub>2</sub> Cl <sub>3</sub>  | 328.0512      | ✓                                 | ✓                  | ✓                  |                |
| C <sub>12</sub> H <sub>21</sub> O <sub>2</sub> N <sub>2</sub> Cl <sub>3</sub>  | 330.0669      | ✓                                 | ✓                  | ✓                  |                |
| C <sub>13</sub> H <sub>17</sub> O <sub>2</sub> N <sub>2</sub> Cl <sub>3</sub>  | 338.0356      | ✓                                 | ✓                  | ✓                  |                |
| C <sub>20</sub> H <sub>21</sub> ON <sub>2</sub> Cl                             | 340.1342      | ✓                                 |                    | ✓                  | ✓              |
| C <sub>17</sub> H <sub>26</sub> ON <sub>2</sub> Cl <sub>2</sub>                | 344.1422      | ✓                                 | ✓                  |                    | ✓              |
| C <sub>15</sub> H <sub>19</sub> ON <sub>2</sub> Cl <sub>3</sub>                | 348.0563      | ✓                                 | ✓                  | ✓                  |                |
| C <sub>15</sub> H <sub>21</sub> ON <sub>2</sub> Cl <sub>3</sub>                | 350.0719      | ✓                                 | ✓                  | ✓                  |                |
| C <sub>14</sub> H <sub>19</sub> O <sub>2</sub> N <sub>2</sub> Cl <sub>3</sub>  | 352.0512      | ✓                                 | ✓                  | ✓                  |                |
| C <sub>15</sub> H <sub>25</sub> ON <sub>2</sub> Cl <sub>3</sub>                | 354.1032      | ✓                                 | ✓                  | ✓                  |                |
| C <sub>17</sub> H <sub>24</sub> O <sub>2</sub> N <sub>2</sub> Cl <sub>2</sub>  | 358.1215      | ✓                                 | ✓                  | ✓                  |                |
| C <sub>21</sub> H <sub>31</sub> ON <sub>2</sub> Cl                             | 362.2125      | ✓                                 | ✓                  | ✓                  |                |
| C <sub>15</sub> H <sub>19</sub> O <sub>2</sub> N <sub>2</sub> Cl <sub>3</sub>  | 364.0512      | ✓                                 |                    | ✓                  | ✓              |
| C <sub>15</sub> H <sub>25</sub> O <sub>6</sub> N <sub>2</sub> Cl               | 364.1401      | ✓                                 | ✓                  | ✓                  |                |
| C <sub>13</sub> H <sub>15</sub> O <sub>4</sub> N <sub>2</sub> Cl <sub>3</sub>  | 368.0097      | ✓                                 | ✓                  |                    | ✓              |
| C <sub>14</sub> H <sub>19</sub> O <sub>3</sub> N <sub>2</sub> Cl <sub>3</sub>  | 368.0461      | ✓                                 | ✓                  | ✓                  |                |
| C <sub>15</sub> H <sub>23</sub> O <sub>2</sub> N <sub>2</sub> Cl <sub>3</sub>  | 368.0825      | ✓                                 | ✓                  | ✓                  |                |

| DBP formula                                                                    | Theo. MW (Da) | Presence(s) of DBPs in this study |                    |                    |                |
|--------------------------------------------------------------------------------|---------------|-----------------------------------|--------------------|--------------------|----------------|
|                                                                                |               | RW-Cl <sub>2</sub>                | CW-Cl <sub>2</sub> | FW-Cl <sub>2</sub> | Finished water |
| C <sub>10</sub> H <sub>21</sub> O <sub>9</sub> NCl <sub>2</sub>                | 369.0593      | ✓                                 | ✓                  | ✓                  |                |
| C <sub>18</sub> H <sub>26</sub> O <sub>2</sub> N <sub>2</sub> Cl <sub>2</sub>  | 372.1371      | ✓                                 | ✓                  |                    | ✓              |
| C <sub>19</sub> H <sub>30</sub> ON <sub>2</sub> Cl <sub>2</sub>                | 372.1735      | ✓                                 | ✓                  | ✓                  |                |
| C <sub>17</sub> H <sub>25</sub> ON <sub>2</sub> Cl <sub>3</sub>                | 378.1032      | ✓                                 | ✓                  | ✓                  |                |
| C <sub>11</sub> H <sub>22</sub> O <sub>11</sub> NCl                            | 379.0881      | ✓                                 | ✓                  | ✓                  |                |
| C <sub>15</sub> H <sub>19</sub> O <sub>3</sub> N <sub>2</sub> Cl <sub>3</sub>  | 380.0461      | ✓                                 | ✓                  | ✓                  |                |
| C <sub>16</sub> H <sub>23</sub> O <sub>2</sub> N <sub>2</sub> Cl <sub>3</sub>  | 380.0825      | ✓                                 | ✓                  | ✓                  |                |
| C <sub>16</sub> H <sub>25</sub> O <sub>2</sub> N <sub>2</sub> Cl <sub>3</sub>  | 382.0982      | ✓                                 | ✓                  | ✓                  |                |
| C <sub>19</sub> H <sub>28</sub> O <sub>2</sub> N <sub>2</sub> Cl <sub>2</sub>  | 386.1528      | ✓                                 | ✓                  |                    | ✓              |
| C <sub>17</sub> H <sub>21</sub> O <sub>2</sub> N <sub>2</sub> Cl <sub>3</sub>  | 390.0669      | ✓                                 | ✓                  | ✓                  |                |
| C <sub>18</sub> H <sub>25</sub> ON <sub>2</sub> Cl <sub>3</sub>                | 390.1032      | ✓                                 | ✓                  | ✓                  |                |
| C <sub>16</sub> H <sub>21</sub> O <sub>3</sub> N <sub>2</sub> Cl <sub>3</sub>  | 394.0618      | ✓                                 | ✓                  | ✓                  |                |
| C <sub>17</sub> H <sub>25</sub> O <sub>2</sub> N <sub>2</sub> Cl <sub>3</sub>  | 394.0982      | ✓                                 | ✓                  | ✓                  |                |
| C <sub>11</sub> H <sub>23</sub> O <sub>11</sub> N <sub>2</sub> Cl              | 394.0990      | ✓                                 | ✓                  | ✓                  |                |
| C <sub>11</sub> H <sub>22</sub> O <sub>9</sub> N <sub>2</sub> Cl <sub>2</sub>  | 396.0702      | ✓                                 | ✓                  | ✓                  |                |
| C <sub>19</sub> H <sub>32</sub> O <sub>3</sub> N <sub>2</sub> Cl <sub>2</sub>  | 406.1790      | ✓                                 | ✓                  | ✓                  |                |
| C <sub>17</sub> H <sub>25</sub> O <sub>3</sub> N <sub>2</sub> Cl <sub>3</sub>  | 410.0931      | ✓                                 | ✓                  | ✓                  |                |
| C <sub>16</sub> H <sub>23</sub> O <sub>4</sub> N <sub>2</sub> Cl <sub>3</sub>  | 412.0723      | ✓                                 | ✓                  | ✓                  |                |
| C <sub>22</sub> H <sub>22</sub> O <sub>2</sub> N <sub>2</sub> Cl <sub>2</sub>  | 416.1058      | ✓                                 | ✓                  | ✓                  |                |
| C <sub>19</sub> H <sub>25</sub> O <sub>2</sub> N <sub>2</sub> Cl <sub>3</sub>  | 418.0982      | ✓                                 | ✓                  | ✓                  |                |
| C <sub>13</sub> H <sub>25</sub> O <sub>11</sub> N <sub>2</sub> Cl              | 420.1147      | ✓                                 | ✓                  | ✓                  |                |
| C <sub>17</sub> H <sub>23</sub> O <sub>4</sub> N <sub>2</sub> Cl <sub>3</sub>  | 424.0723      | ✓                                 | ✓                  | ✓                  |                |
| C <sub>18</sub> H <sub>27</sub> O <sub>3</sub> N <sub>2</sub> Cl <sub>3</sub>  | 424.1087      | ✓                                 | ✓                  | ✓                  |                |
| C <sub>18</sub> H <sub>19</sub> O <sub>8</sub> N <sub>2</sub> Cl               | 426.0830      | ✓                                 | ✓                  | ✓                  |                |
| C <sub>22</sub> H <sub>20</sub> O <sub>3</sub> N <sub>2</sub> Cl <sub>2</sub>  | 430.0851      | ✓                                 | ✓                  | ✓                  |                |
| C <sub>13</sub> H <sub>23</sub> O <sub>12</sub> N <sub>2</sub> Cl              | 434.0940      | ✓                                 | ✓                  | ✓                  |                |
| C <sub>13</sub> H <sub>25</sub> O <sub>12</sub> N <sub>2</sub> Cl              | 436.1096      | ✓                                 | ✓                  | ✓                  |                |
| C <sub>20</sub> H <sub>29</sub> O <sub>3</sub> N <sub>2</sub> Cl <sub>3</sub>  | 450.1244      | ✓                                 | ✓                  | ✓                  |                |
| C <sub>15</sub> H <sub>29</sub> O <sub>12</sub> N <sub>2</sub> Cl              | 464.1409      | ✓                                 | ✓                  | ✓                  |                |
| C <sub>19</sub> H <sub>29</sub> O <sub>5</sub> N <sub>2</sub> Cl <sub>3</sub>  | 470.1142      | ✓                                 | ✓                  | ✓                  |                |
| C <sub>21</sub> H <sub>26</sub> O <sub>10</sub> NCl                            | 487.1245      | ✓                                 | ✓                  | ✓                  |                |
| C <sub>14</sub> H <sub>17</sub> O <sub>11</sub> N <sub>2</sub> Cl <sub>3</sub> | 493.9898      | ✓                                 | ✓                  | ✓                  |                |
| C <sub>5</sub> H <sub>7</sub> O <sub>2</sub> N <sub>2</sub> Cl                 | 162.0196      | ✓                                 | ✓                  |                    |                |
| C <sub>6</sub> H <sub>1</sub> O <sub>2</sub> N <sub>2</sub> Cl                 | 167.9727      |                                   | ✓                  |                    | ✓              |
| C <sub>2</sub> H <sub>5</sub> O <sub>2</sub> N <sub>2</sub> Cl <sub>3</sub>    | 193.9417      |                                   |                    | ✓                  | ✓              |
| C <sub>6</sub> H <sub>6</sub> O <sub>2</sub> N <sub>2</sub> Cl <sub>2</sub>    | 207.9806      | ✓                                 | ✓                  |                    |                |
| C <sub>7</sub> H <sub>3</sub> O <sub>4</sub> N <sub>2</sub> Cl                 | 213.9781      | ✓                                 | ✓                  |                    |                |
| C <sub>8</sub> H <sub>8</sub> O <sub>4</sub> NCl                               | 217.0142      |                                   | ✓                  |                    | ✓              |
| C <sub>9</sub> H <sub>1</sub> O <sub>4</sub> N <sub>2</sub> Cl                 | 235.9625      | ✓                                 | ✓                  |                    |                |



| DBP formula                                                                   | Theo. MW (Da) | Presence(s) of DBPs in this study |                    |                    |                |
|-------------------------------------------------------------------------------|---------------|-----------------------------------|--------------------|--------------------|----------------|
|                                                                               |               | RW-Cl <sub>2</sub>                | CW-Cl <sub>2</sub> | FW-Cl <sub>2</sub> | Finished water |
| C <sub>9</sub> H <sub>11</sub> O <sub>4</sub> N <sub>2</sub> Cl               | 246.0407      |                                   |                    | ✓                  | ✓              |
| C <sub>8</sub> H <sub>5</sub> O <sub>4</sub> NCl <sub>2</sub>                 | 248.9596      | ✓                                 |                    |                    | ✓              |
| C <sub>8</sub> H <sub>10</sub> O <sub>3</sub> N <sub>2</sub> Cl <sub>2</sub>  | 252.0068      |                                   | ✓                  | ✓                  |                |
| C <sub>11</sub> H <sub>14</sub> ON <sub>2</sub> Cl <sub>2</sub>               | 260.0483      |                                   | ✓                  |                    | ✓              |
| C <sub>11</sub> H <sub>18</sub> ON <sub>2</sub> Cl <sub>2</sub>               | 264.0796      |                                   | ✓                  |                    | ✓              |
| C <sub>9</sub> H <sub>12</sub> O <sub>3</sub> N <sub>2</sub> Cl <sub>2</sub>  | 266.0225      | ✓                                 | ✓                  |                    |                |
| C <sub>14</sub> H <sub>7</sub> O <sub>2</sub> N <sub>2</sub> Cl               | 270.0196      |                                   | ✓                  | ✓                  |                |
| C <sub>15</sub> H <sub>21</sub> ON <sub>2</sub> Cl                            | 280.1342      |                                   | ✓                  | ✓                  |                |
| C <sub>10</sub> H <sub>13</sub> ON <sub>2</sub> Cl <sub>3</sub>               | 282.0093      | ✓                                 |                    |                    | ✓              |
| C <sub>13</sub> H <sub>17</sub> O <sub>3</sub> N <sub>2</sub> Cl              | 284.0928      |                                   | ✓                  |                    | ✓              |
| C <sub>17</sub> H <sub>16</sub> ONCl                                          | 285.0920      | ✓                                 |                    | ✓                  |                |
| C <sub>9</sub> H <sub>15</sub> O <sub>2</sub> N <sub>2</sub> Cl <sub>3</sub>  | 288.0199      |                                   | ✓                  | ✓                  |                |
| C <sub>13</sub> H <sub>18</sub> ON <sub>2</sub> Cl <sub>2</sub>               | 288.0796      | ✓                                 | ✓                  |                    |                |
| C <sub>8</sub> H <sub>19</sub> O <sub>7</sub> N <sub>2</sub> Cl               | 290.0881      | ✓                                 | ✓                  |                    |                |
| C <sub>8</sub> H <sub>15</sub> O <sub>3</sub> N <sub>2</sub> Cl <sub>3</sub>  | 292.0148      |                                   | ✓                  | ✓                  |                |
| C <sub>14</sub> H <sub>10</sub> ON <sub>2</sub> Cl <sub>2</sub>               | 292.0170      |                                   | ✓                  | ✓                  |                |
| C <sub>7</sub> H <sub>17</sub> O <sub>8</sub> N <sub>2</sub> Cl               | 292.0673      |                                   | ✓                  | ✓                  |                |
| C <sub>12</sub> H <sub>18</sub> O <sub>2</sub> N <sub>2</sub> Cl <sub>2</sub> | 292.0745      | ✓                                 | ✓                  |                    |                |
| C <sub>6</sub> H <sub>14</sub> O <sub>7</sub> N <sub>2</sub> Cl <sub>2</sub>  | 296.0178      | ✓                                 | ✓                  |                    |                |
| C <sub>10</sub> H <sub>13</sub> O <sub>2</sub> N <sub>2</sub> Cl <sub>3</sub> | 298.0043      | ✓                                 | ✓                  |                    |                |
| C <sub>17</sub> H <sub>15</sub> ON <sub>2</sub> Cl                            | 298.0873      | ✓                                 |                    | ✓                  |                |
| C <sub>18</sub> H <sub>18</sub> ONCl                                          | 299.1077      | ✓                                 |                    | ✓                  |                |
| C <sub>16</sub> H <sub>13</sub> O <sub>2</sub> N <sub>2</sub> Cl              | 300.0666      |                                   |                    | ✓                  | ✓              |
| C <sub>14</sub> H <sub>18</sub> ON <sub>2</sub> Cl <sub>2</sub>               | 300.0796      | ✓                                 | ✓                  |                    |                |
| C <sub>12</sub> H <sub>22</sub> ONCl <sub>3</sub>                             | 301.0767      |                                   | ✓                  |                    | ✓              |
| C <sub>14</sub> H <sub>22</sub> ON <sub>2</sub> Cl <sub>2</sub>               | 304.1109      | ✓                                 |                    | ✓                  |                |
| C <sub>8</sub> H <sub>16</sub> O <sub>6</sub> N <sub>2</sub> Cl <sub>2</sub>  | 306.0385      | ✓                                 | ✓                  |                    |                |
| C <sub>8</sub> H <sub>18</sub> O <sub>6</sub> N <sub>2</sub> Cl <sub>2</sub>  | 308.0542      | ✓                                 | ✓                  |                    |                |
| C <sub>12</sub> H <sub>19</sub> ON <sub>2</sub> Cl <sub>3</sub>               | 312.0563      |                                   | ✓                  | ✓                  |                |
| C <sub>17</sub> H <sub>13</sub> O <sub>2</sub> N <sub>2</sub> Cl              | 312.0666      |                                   | ✓                  | ✓                  |                |
| C <sub>15</sub> H <sub>23</sub> O <sub>3</sub> N <sub>2</sub> Cl              | 314.1397      |                                   | ✓                  |                    | ✓              |
| C <sub>9</sub> H <sub>14</sub> O <sub>9</sub> NCl                             | 315.0357      | ✓                                 | ✓                  |                    |                |
| C <sub>15</sub> H <sub>22</sub> ON <sub>2</sub> Cl <sub>2</sub>               | 316.1109      |                                   | ✓                  |                    | ✓              |
| C <sub>15</sub> H <sub>24</sub> ON <sub>2</sub> Cl <sub>2</sub>               | 318.1266      | ✓                                 | ✓                  |                    |                |
| C <sub>12</sub> H <sub>13</sub> O <sub>2</sub> N <sub>2</sub> Cl <sub>3</sub> | 322.0043      | ✓                                 | ✓                  |                    |                |
| C <sub>12</sub> H <sub>15</sub> O <sub>2</sub> N <sub>2</sub> Cl <sub>3</sub> | 324.0199      | ✓                                 |                    |                    | ✓              |
| C <sub>13</sub> H <sub>19</sub> ON <sub>2</sub> Cl <sub>3</sub>               | 324.0563      | ✓                                 | ✓                  |                    |                |
| C <sub>11</sub> H <sub>13</sub> O <sub>3</sub> N <sub>2</sub> Cl <sub>3</sub> | 325.9992      | ✓                                 | ✓                  |                    |                |
| C <sub>13</sub> H <sub>21</sub> ON <sub>2</sub> Cl <sub>3</sub>               | 326.0719      |                                   | ✓                  | ✓                  |                |

| DBP formula                                                                   | Theo. MW (Da) | Presence(s) of DBPs in this study |                    |                    |                |
|-------------------------------------------------------------------------------|---------------|-----------------------------------|--------------------|--------------------|----------------|
|                                                                               |               | RW-Cl <sub>2</sub>                | CW-Cl <sub>2</sub> | FW-Cl <sub>2</sub> | Finished water |
| C <sub>17</sub> H <sub>27</sub> O <sub>2</sub> N <sub>2</sub> Cl              | 326.1761      | ✓                                 | ✓                  |                    |                |
| C <sub>12</sub> H <sub>24</sub> O <sub>7</sub> NCl                            | 329.1241      | ✓                                 | ✓                  |                    |                |
| C <sub>16</sub> H <sub>27</sub> O <sub>3</sub> N <sub>2</sub> Cl              | 330.1710      | ✓                                 | ✓                  |                    |                |
| C <sub>10</sub> H <sub>17</sub> O <sub>4</sub> N <sub>2</sub> Cl <sub>3</sub> | 334.0254      |                                   |                    | ✓                  | ✓              |
| C <sub>16</sub> H <sub>12</sub> O <sub>2</sub> N <sub>2</sub> Cl <sub>2</sub> | 334.0276      |                                   |                    | ✓                  | ✓              |
| C <sub>14</sub> H <sub>17</sub> ON <sub>2</sub> Cl <sub>3</sub>               | 334.0406      |                                   | ✓                  | ✓                  |                |
| C <sub>15</sub> H <sub>24</sub> O <sub>2</sub> N <sub>2</sub> Cl <sub>2</sub> | 334.1215      | ✓                                 | ✓                  |                    |                |
| C <sub>19</sub> H <sub>27</sub> ON <sub>2</sub> Cl                            | 334.1812      |                                   | ✓                  | ✓                  |                |
| C <sub>9</sub> H <sub>21</sub> O <sub>9</sub> N <sub>2</sub> Cl               | 336.0936      | ✓                                 | ✓                  |                    |                |
| C <sub>15</sub> H <sub>26</sub> O <sub>2</sub> N <sub>2</sub> Cl <sub>2</sub> | 336.1371      | ✓                                 | ✓                  |                    |                |
| C <sub>18</sub> H <sub>25</sub> O <sub>2</sub> N <sub>2</sub> Cl              | 336.1605      | ✓                                 | ✓                  |                    |                |
| C <sub>19</sub> H <sub>29</sub> ON <sub>2</sub> Cl                            | 336.1968      |                                   | ✓                  | ✓                  |                |
| C <sub>12</sub> H <sub>13</sub> O <sub>3</sub> N <sub>2</sub> Cl <sub>3</sub> | 337.9992      | ✓                                 | ✓                  |                    |                |
| C <sub>12</sub> H <sub>15</sub> O <sub>3</sub> N <sub>2</sub> Cl <sub>3</sub> | 340.0148      | ✓                                 | ✓                  |                    |                |
| C <sub>18</sub> H <sub>13</sub> O <sub>3</sub> N <sub>2</sub> Cl              | 340.0615      |                                   | ✓                  |                    | ✓              |
| C <sub>17</sub> H <sub>22</sub> ON <sub>2</sub> Cl <sub>2</sub>               | 340.1109      | ✓                                 | ✓                  |                    |                |
| C <sub>16</sub> H <sub>9</sub> O <sub>5</sub> N <sub>2</sub> Cl               | 344.0200      |                                   | ✓                  | ✓                  |                |
| C <sub>16</sub> H <sub>21</sub> O <sub>3</sub> NCl <sub>2</sub>               | 345.0899      |                                   |                    | ✓                  | ✓              |
| C <sub>16</sub> H <sub>11</sub> O <sub>5</sub> N <sub>2</sub> Cl              | 346.0357      |                                   | ✓                  | ✓                  |                |
| C <sub>13</sub> H <sub>24</sub> O <sub>3</sub> NCl <sub>3</sub>               | 347.0822      |                                   | ✓                  |                    | ✓              |
| C <sub>19</sub> H <sub>25</sub> O <sub>2</sub> N <sub>2</sub> Cl              | 348.1605      |                                   | ✓                  |                    | ✓              |
| C <sub>20</sub> H <sub>31</sub> ON <sub>2</sub> Cl                            | 350.2125      |                                   | ✓                  | ✓                  |                |
| C <sub>14</sub> H <sub>21</sub> O <sub>2</sub> N <sub>2</sub> Cl <sub>3</sub> | 354.0669      |                                   | ✓                  | ✓                  |                |
| C <sub>18</sub> H <sub>26</sub> ON <sub>2</sub> Cl <sub>2</sub>               | 356.1422      | ✓                                 | ✓                  |                    |                |
| C <sub>12</sub> H <sub>7</sub> O <sub>9</sub> N <sub>2</sub> Cl               | 357.9840      |                                   | ✓                  | ✓                  |                |
| C <sub>19</sub> H <sub>19</sub> O <sub>3</sub> N <sub>2</sub> Cl              | 358.1084      |                                   |                    | ✓                  | ✓              |
| C <sub>16</sub> H <sub>19</sub> ON <sub>2</sub> Cl <sub>3</sub>               | 360.0563      |                                   | ✓                  | ✓                  |                |
| C <sub>16</sub> H <sub>21</sub> ON <sub>2</sub> Cl <sub>3</sub>               | 362.0719      |                                   | ✓                  | ✓                  |                |
| C <sub>10</sub> H <sub>19</sub> O <sub>10</sub> N <sub>2</sub> Cl             | 362.0728      | ✓                                 | ✓                  |                    |                |
| C <sub>14</sub> H <sub>15</sub> O <sub>3</sub> N <sub>2</sub> Cl <sub>3</sub> | 364.0148      | ✓                                 | ✓                  |                    |                |
| C <sub>15</sub> H <sub>22</sub> O <sub>4</sub> N <sub>2</sub> Cl <sub>2</sub> | 364.0957      |                                   | ✓                  | ✓                  |                |
| C <sub>19</sub> H <sub>25</sub> O <sub>3</sub> N <sub>2</sub> Cl              | 364.1554      | ✓                                 | ✓                  |                    |                |
| C <sub>16</sub> H <sub>29</sub> O <sub>5</sub> N <sub>2</sub> Cl              | 364.1765      | ✓                                 |                    | ✓                  |                |
| C <sub>16</sub> H <sub>25</sub> ON <sub>2</sub> Cl <sub>3</sub>               | 366.1032      |                                   | ✓                  | ✓                  |                |
| C <sub>19</sub> H <sub>29</sub> O <sub>3</sub> N <sub>2</sub> Cl              | 368.1867      |                                   | ✓                  |                    | ✓              |
| C <sub>22</sub> H <sub>31</sub> ON <sub>2</sub> Cl                            | 374.2125      |                                   | ✓                  | ✓                  |                |
| C <sub>16</sub> H <sub>19</sub> O <sub>2</sub> N <sub>2</sub> Cl <sub>3</sub> | 376.0512      | ✓                                 | ✓                  |                    |                |
| C <sub>17</sub> H <sub>23</sub> ON <sub>2</sub> Cl <sub>3</sub>               | 376.0876      | ✓                                 | ✓                  |                    |                |
| C <sub>14</sub> H <sub>25</sub> O <sub>8</sub> N <sub>2</sub> Cl              | 384.1299      |                                   | ✓                  |                    | ✓              |

| DBP formula                                                                    | Theo. MW (Da) | Presence(s) of DBPs in this study |                    |                    |                |
|--------------------------------------------------------------------------------|---------------|-----------------------------------|--------------------|--------------------|----------------|
|                                                                                |               | RW-Cl <sub>2</sub>                | CW-Cl <sub>2</sub> | FW-Cl <sub>2</sub> | Finished water |
| C <sub>12</sub> H <sub>23</sub> O <sub>10</sub> N <sub>2</sub> Cl              | 390.1041      | ✓                                 | ✓                  |                    |                |
| C <sub>11</sub> H <sub>21</sub> O <sub>11</sub> N <sub>2</sub> Cl              | 392.0834      | ✓                                 | ✓                  |                    |                |
| C <sub>15</sub> H <sub>24</sub> O <sub>9</sub> NCl                             | 397.1140      |                                   | ✓                  |                    | ✓              |
| C <sub>18</sub> H <sub>17</sub> O <sub>2</sub> N <sub>2</sub> Cl <sub>3</sub>  | 398.0356      |                                   | ✓                  | ✓                  |                |
| C <sub>22</sub> H <sub>23</sub> O <sub>3</sub> N <sub>2</sub> Cl               | 398.1397      |                                   | ✓                  | ✓                  |                |
| C <sub>10</sub> H <sub>19</sub> O <sub>8</sub> N <sub>2</sub> Cl <sub>3</sub>  | 400.0207      | ✓                                 |                    |                    | ✓              |
| C <sub>20</sub> H <sub>30</sub> O <sub>2</sub> N <sub>2</sub> Cl <sub>2</sub>  | 400.1684      | ✓                                 | ✓                  |                    |                |
| C <sub>17</sub> H <sub>9</sub> O <sub>8</sub> N <sub>2</sub> Cl                | 404.0047      |                                   | ✓                  | ✓                  |                |
| C <sub>18</sub> H <sub>13</sub> O <sub>7</sub> N <sub>2</sub> Cl               | 404.0411      |                                   | ✓                  | ✓                  |                |
| C <sub>18</sub> H <sub>25</sub> O <sub>2</sub> N <sub>2</sub> Cl <sub>3</sub>  | 406.0982      |                                   | ✓                  | ✓                  |                |
| C <sub>19</sub> H <sub>29</sub> ON <sub>2</sub> Cl <sub>3</sub>                | 406.1345      | ✓                                 | ✓                  |                    |                |
| C <sub>14</sub> H <sub>31</sub> O <sub>9</sub> N <sub>2</sub> Cl               | 406.1718      | ✓                                 |                    | ✓                  |                |
| C <sub>17</sub> H <sub>23</sub> O <sub>3</sub> N <sub>2</sub> Cl <sub>3</sub>  | 408.0774      | ✓                                 | ✓                  |                    |                |
| C <sub>20</sub> H <sub>25</sub> O <sub>5</sub> N <sub>2</sub> Cl               | 408.1452      |                                   | ✓                  | ✓                  |                |
| C <sub>16</sub> H <sub>21</sub> O <sub>4</sub> N <sub>2</sub> Cl <sub>3</sub>  | 410.0567      | ✓                                 |                    | ✓                  |                |
| C <sub>19</sub> H <sub>25</sub> O <sub>6</sub> N <sub>2</sub> Cl               | 412.1401      |                                   | ✓                  |                    | ✓              |
| C <sub>21</sub> H <sub>18</sub> O <sub>3</sub> N <sub>2</sub> Cl <sub>2</sub>  | 416.0694      | ✓                                 | ✓                  |                    |                |
| C <sub>19</sub> H <sub>23</sub> O <sub>2</sub> N <sub>2</sub> Cl <sub>3</sub>  | 416.0825      |                                   | ✓                  | ✓                  |                |
| C <sub>19</sub> H <sub>29</sub> O <sub>2</sub> N <sub>2</sub> Cl <sub>3</sub>  | 422.1295      | ✓                                 | ✓                  |                    |                |
| C <sub>16</sub> H <sub>27</sub> O <sub>9</sub> N <sub>2</sub> Cl               | 426.1405      |                                   | ✓                  | ✓                  |                |
| C <sub>14</sub> H <sub>26</sub> O <sub>9</sub> N <sub>2</sub> Cl <sub>2</sub>  | 436.1015      |                                   | ✓                  | ✓                  |                |
| C <sub>18</sub> H <sub>27</sub> O <sub>4</sub> N <sub>2</sub> Cl <sub>3</sub>  | 440.1036      |                                   | ✓                  | ✓                  |                |
| C <sub>18</sub> H <sub>16</sub> O <sub>7</sub> N <sub>2</sub> Cl <sub>2</sub>  | 442.0335      |                                   | ✓                  | ✓                  |                |
| C <sub>15</sub> H <sub>27</sub> O <sub>11</sub> N <sub>2</sub> Cl              | 446.1303      | ✓                                 | ✓                  |                    |                |
| C <sub>13</sub> H <sub>22</sub> O <sub>11</sub> N <sub>2</sub> Cl <sub>2</sub> | 452.0601      |                                   | ✓                  | ✓                  |                |
| C <sub>19</sub> H <sub>33</sub> O <sub>11</sub> N <sub>2</sub> Cl              | 500.1773      |                                   |                    | ✓                  | ✓              |
| C <sub>5</sub> H <sub>6</sub> O <sub>2</sub> NCl                               | 147.0087      |                                   | ✓                  |                    |                |
| C <sub>5</sub> H <sub>1</sub> ONCl <sub>2</sub>                                | 160.9435      |                                   |                    |                    | ✓              |
| C <sub>6</sub> H <sub>8</sub> O <sub>2</sub> NCl                               | 161.0244      |                                   |                    |                    | ✓              |
| C <sub>7</sub> H <sub>9</sub> ON <sub>2</sub> Cl                               | 172.0403      |                                   |                    |                    | ✓              |
| C <sub>8</sub> H <sub>5</sub> ON <sub>2</sub> Cl                               | 180.0090      |                                   |                    | ✓                  |                |
| C <sub>6</sub> H <sub>1</sub> O <sub>3</sub> N <sub>2</sub> Cl                 | 183.9676      | ✓                                 |                    |                    |                |
| C <sub>5</sub> H <sub>10</sub> ON <sub>2</sub> Cl <sub>2</sub>                 | 184.0170      |                                   |                    | ✓                  |                |
| C <sub>4</sub> H <sub>9</sub> O <sub>4</sub> N <sub>2</sub> Cl                 | 184.0251      |                                   |                    |                    | ✓              |
| C <sub>7</sub> H <sub>4</sub> O <sub>3</sub> NCl                               | 184.9880      |                                   | ✓                  |                    |                |
| C <sub>5</sub> H <sub>1</sub> O <sub>4</sub> N <sub>2</sub> Cl                 | 187.9625      |                                   |                    |                    | ✓              |
| C <sub>6</sub> H <sub>7</sub> O <sub>3</sub> N <sub>2</sub> Cl                 | 190.0145      |                                   |                    | ✓                  |                |
| C <sub>7</sub> H <sub>3</sub> O <sub>3</sub> N <sub>2</sub> Cl                 | 197.9832      | ✓                                 |                    |                    |                |
| C <sub>9</sub> H <sub>11</sub> ON <sub>2</sub> Cl                              | 198.0560      |                                   | ✓                  |                    |                |

| DBP formula                                                                   | Theo. MW (Da) | Presence(s) of DBPs in this study |                    |                    |                |
|-------------------------------------------------------------------------------|---------------|-----------------------------------|--------------------|--------------------|----------------|
|                                                                               |               | RW-Cl <sub>2</sub>                | CW-Cl <sub>2</sub> | FW-Cl <sub>2</sub> | Finished water |
| C <sub>8</sub> H <sub>13</sub> O <sub>2</sub> N <sub>2</sub> Cl               | 204.0666      |                                   | ✓                  |                    |                |
| C <sub>8</sub> H <sub>4</sub> O <sub>4</sub> NCl                              | 212.9829      |                                   | ✓                  |                    |                |
| C <sub>11</sub> H <sub>5</sub> ON <sub>2</sub> Cl                             | 216.0090      |                                   |                    |                    | ✓              |
| C <sub>7</sub> H <sub>4</sub> O <sub>2</sub> N <sub>2</sub> Cl <sub>2</sub>   | 217.9650      | ✓                                 |                    |                    |                |
| C <sub>9</sub> H <sub>14</sub> O <sub>3</sub> NCl                             | 219.0662      | ✓                                 |                    |                    |                |
| C <sub>7</sub> H <sub>8</sub> O <sub>2</sub> N <sub>2</sub> Cl <sub>2</sub>   | 221.9963      |                                   |                    |                    | ✓              |
| C <sub>11</sub> H <sub>13</sub> ON <sub>2</sub> Cl                            | 224.0716      |                                   | ✓                  |                    |                |
| C <sub>7</sub> H <sub>12</sub> O <sub>2</sub> N <sub>2</sub> Cl <sub>2</sub>  | 226.0276      |                                   |                    | ✓                  |                |
| C <sub>6</sub> H <sub>7</sub> ON <sub>2</sub> Cl <sub>3</sub>                 | 227.9624      | ✓                                 |                    |                    |                |
| C <sub>9</sub> H <sub>6</sub> ON <sub>2</sub> Cl <sub>2</sub>                 | 227.9857      | ✓                                 |                    |                    |                |
| C <sub>11</sub> H <sub>19</sub> ON <sub>2</sub> Cl                            | 230.1186      |                                   | ✓                  |                    |                |
| C <sub>12</sub> H <sub>9</sub> ON <sub>2</sub> Cl                             | 232.0403      |                                   |                    |                    | ✓              |
| C <sub>12</sub> H <sub>11</sub> ON <sub>2</sub> Cl                            | 234.0560      |                                   |                    |                    | ✓              |
| C <sub>9</sub> H <sub>15</sub> O <sub>3</sub> N <sub>2</sub> Cl               | 234.0771      |                                   | ✓                  |                    |                |
| C <sub>9</sub> H <sub>14</sub> ON <sub>2</sub> Cl <sub>2</sub>                | 236.0483      |                                   |                    |                    | ✓              |
| C <sub>7</sub> H <sub>7</sub> ON <sub>2</sub> Cl <sub>3</sub>                 | 239.9624      |                                   |                    |                    | ✓              |
| C <sub>9</sub> H <sub>4</sub> O <sub>5</sub> NCl                              | 240.9778      |                                   |                    |                    | ✓              |
| C <sub>10</sub> H <sub>10</sub> ON <sub>2</sub> Cl <sub>2</sub>               | 244.0170      |                                   |                    |                    | ✓              |
| C <sub>13</sub> H <sub>9</sub> ON <sub>2</sub> Cl                             | 244.0403      |                                   |                    |                    | ✓              |
| C <sub>10</sub> H <sub>12</sub> ON <sub>2</sub> Cl <sub>2</sub>               | 246.0327      | ✓                                 |                    |                    |                |
| C <sub>7</sub> H <sub>5</sub> O <sub>6</sub> N <sub>2</sub> Cl                | 247.9836      |                                   |                    |                    | ✓              |
| C <sub>10</sub> H <sub>17</sub> O <sub>3</sub> N <sub>2</sub> Cl              | 248.0928      |                                   | ✓                  |                    |                |
| C <sub>8</sub> H <sub>5</sub> ON <sub>2</sub> Cl <sub>3</sub>                 | 249.9467      | ✓                                 |                    |                    |                |
| C <sub>13</sub> H <sub>17</sub> ON <sub>2</sub> Cl                            | 252.1029      |                                   | ✓                  |                    |                |
| C <sub>11</sub> H <sub>24</sub> O <sub>3</sub> NCl                            | 253.1445      |                                   | ✓                  |                    |                |
| C <sub>7</sub> H <sub>5</sub> O <sub>2</sub> N <sub>2</sub> Cl <sub>3</sub>   | 253.9417      |                                   | ✓                  |                    |                |
| C <sub>8</sub> H <sub>11</sub> O <sub>4</sub> NCl <sub>2</sub>                | 255.0065      |                                   |                    |                    | ✓              |
| C <sub>13</sub> H <sub>21</sub> ON <sub>2</sub> Cl                            | 256.1342      |                                   | ✓                  |                    |                |
| C <sub>9</sub> H <sub>7</sub> O <sub>5</sub> N <sub>2</sub> Cl                | 258.0044      |                                   |                    |                    | ✓              |
| C <sub>12</sub> H <sub>19</sub> O <sub>2</sub> N <sub>2</sub> Cl              | 258.1135      |                                   | ✓                  |                    |                |
| C <sub>10</sub> H <sub>10</sub> O <sub>2</sub> N <sub>2</sub> Cl <sub>2</sub> | 260.0119      | ✓                                 |                    |                    |                |
| C <sub>9</sub> H <sub>9</sub> ON <sub>2</sub> Cl <sub>3</sub>                 | 265.9780      | ✓                                 |                    |                    |                |
| C <sub>5</sub> H <sub>12</sub> O <sub>6</sub> N <sub>2</sub> Cl <sub>2</sub>  | 266.0072      | ✓                                 |                    |                    |                |
| C <sub>11</sub> H <sub>6</sub> O <sub>2</sub> N <sub>2</sub> Cl <sub>2</sub>  | 267.9806      |                                   |                    |                    | ✓              |
| C <sub>12</sub> H <sub>10</sub> ON <sub>2</sub> Cl <sub>2</sub>               | 268.0170      |                                   |                    |                    | ✓              |
| C <sub>11</sub> H <sub>22</sub> ON <sub>2</sub> Cl <sub>2</sub>               | 268.1109      |                                   | ✓                  |                    |                |
| C <sub>10</sub> H <sub>17</sub> O <sub>3</sub> NCl <sub>2</sub>               | 269.0586      |                                   |                    |                    | ✓              |
| C <sub>12</sub> H <sub>12</sub> ON <sub>2</sub> Cl <sub>2</sub>               | 270.0327      | ✓                                 |                    |                    |                |
| C <sub>10</sub> H <sub>20</sub> O <sub>2</sub> N <sub>2</sub> Cl <sub>2</sub> | 270.0902      |                                   |                    | ✓                  |                |

| DBP formula                                                                   | Theo. MW (Da) | Presence(s) of DBPs in this study |                    |                    |                |
|-------------------------------------------------------------------------------|---------------|-----------------------------------|--------------------|--------------------|----------------|
|                                                                               |               | RW-Cl <sub>2</sub>                | CW-Cl <sub>2</sub> | FW-Cl <sub>2</sub> | Finished water |
| C <sub>14</sub> H <sub>23</sub> ON <sub>2</sub> Cl                            | 270.1499      |                                   | ✓                  |                    |                |
| C <sub>10</sub> H <sub>6</sub> O <sub>6</sub> NCl                             | 270.9884      |                                   | ✓                  |                    |                |
| C <sub>10</sub> H <sub>5</sub> O <sub>4</sub> NCl <sub>2</sub>                | 272.9596      |                                   | ✓                  |                    |                |
| C <sub>10</sub> H <sub>8</sub> O <sub>6</sub> NCl                             | 273.0040      |                                   | ✓                  |                    |                |
| C <sub>11</sub> H <sub>12</sub> O <sub>2</sub> N <sub>2</sub> Cl <sub>2</sub> | 274.0276      |                                   | ✓                  |                    |                |
| C <sub>12</sub> H <sub>18</sub> ON <sub>2</sub> Cl <sub>2</sub>               | 276.0796      |                                   | ✓                  |                    |                |
| C <sub>15</sub> H <sub>17</sub> ON <sub>2</sub> Cl                            | 276.1029      |                                   | ✓                  |                    |                |
| C <sub>10</sub> H <sub>12</sub> O <sub>6</sub> NCl                            | 277.0353      |                                   |                    |                    | ✓              |
| C <sub>9</sub> H <sub>7</sub> O <sub>2</sub> N <sub>2</sub> Cl <sub>3</sub>   | 279.9573      |                                   |                    |                    | ✓              |
| C <sub>12</sub> H <sub>9</sub> O <sub>4</sub> N <sub>2</sub> Cl               | 280.0251      |                                   |                    |                    | ✓              |
| C <sub>14</sub> H <sub>17</sub> O <sub>2</sub> N <sub>2</sub> Cl              | 280.0979      |                                   | ✓                  |                    |                |
| C <sub>12</sub> H <sub>22</sub> ON <sub>2</sub> Cl <sub>2</sub>               | 280.1109      |                                   |                    |                    | ✓              |
| C <sub>9</sub> H <sub>6</sub> O <sub>3</sub> NCl <sub>3</sub>                 | 280.9413      |                                   | ✓                  |                    |                |
| C <sub>11</sub> H <sub>20</sub> O <sub>5</sub> NCl                            | 281.1030      |                                   |                    | ✓                  |                |
| C <sub>12</sub> H <sub>24</sub> O <sub>4</sub> NCl                            | 281.1394      |                                   | ✓                  |                    |                |
| C <sub>9</sub> H <sub>9</sub> O <sub>2</sub> N <sub>2</sub> Cl <sub>3</sub>   | 281.9730      | ✓                                 |                    |                    |                |
| C <sub>10</sub> H <sub>16</sub> O <sub>3</sub> N <sub>2</sub> Cl <sub>2</sub> | 282.0538      |                                   |                    | ✓                  |                |
| C <sub>15</sub> H <sub>23</sub> ON <sub>2</sub> Cl                            | 282.1499      |                                   | ✓                  |                    |                |
| C <sub>12</sub> H <sub>10</sub> O <sub>5</sub> NCl                            | 283.0248      |                                   |                    |                    | ✓              |
| C <sub>11</sub> H <sub>22</sub> O <sub>5</sub> NCl                            | 283.1187      |                                   |                    |                    | ✓              |
| C <sub>12</sub> H <sub>10</sub> O <sub>2</sub> N <sub>2</sub> Cl <sub>2</sub> | 284.0119      | ✓                                 |                    |                    |                |
| C <sub>16</sub> H <sub>13</sub> ON <sub>2</sub> Cl                            | 284.0716      |                                   | ✓                  |                    |                |
| C <sub>11</sub> H <sub>22</sub> O <sub>2</sub> N <sub>2</sub> Cl <sub>2</sub> | 284.1058      |                                   |                    | ✓                  |                |
| C <sub>15</sub> H <sub>25</sub> ON <sub>2</sub> Cl                            | 284.1655      |                                   | ✓                  |                    |                |
| C <sub>14</sub> H <sub>7</sub> O <sub>3</sub> N <sub>2</sub> Cl               | 286.0145      |                                   | ✓                  |                    |                |
| C <sub>15</sub> H <sub>11</sub> O <sub>2</sub> N <sub>2</sub> Cl              | 286.0509      |                                   |                    | ✓                  |                |
| C <sub>13</sub> H <sub>16</sub> ON <sub>2</sub> Cl <sub>2</sub>               | 286.0640      |                                   | ✓                  |                    |                |
| C <sub>16</sub> H <sub>15</sub> ON <sub>2</sub> Cl                            | 286.0873      |                                   |                    | ✓                  |                |
| C <sub>16</sub> H <sub>17</sub> ON <sub>2</sub> Cl                            | 288.1029      |                                   |                    | ✓                  |                |
| C <sub>10</sub> H <sub>18</sub> O <sub>2</sub> NCl <sub>3</sub>               | 289.0403      |                                   |                    |                    | ✓              |
| C <sub>13</sub> H <sub>7</sub> O <sub>4</sub> N <sub>2</sub> Cl               | 290.0094      |                                   |                    |                    | ✓              |
| C <sub>13</sub> H <sub>20</sub> ON <sub>2</sub> Cl <sub>2</sub>               | 290.0953      |                                   | ✓                  |                    |                |
| C <sub>10</sub> H <sub>7</sub> O <sub>2</sub> N <sub>2</sub> Cl <sub>3</sub>  | 291.9573      |                                   |                    |                    | ✓              |
| C <sub>12</sub> H <sub>5</sub> O <sub>5</sub> N <sub>2</sub> Cl               | 291.9887      |                                   | ✓                  |                    |                |
| C <sub>14</sub> H <sub>13</sub> O <sub>3</sub> N <sub>2</sub> Cl              | 292.0615      |                                   |                    |                    | ✓              |
| C <sub>16</sub> H <sub>21</sub> ON <sub>2</sub> Cl                            | 292.1342      |                                   | ✓                  |                    |                |
| C <sub>12</sub> H <sub>7</sub> O <sub>5</sub> N <sub>2</sub> Cl               | 294.0044      |                                   |                    |                    | ✓              |
| C <sub>16</sub> H <sub>23</sub> ON <sub>2</sub> Cl                            | 294.1499      |                                   | ✓                  |                    |                |
| C <sub>11</sub> H <sub>18</sub> O <sub>3</sub> N <sub>2</sub> Cl <sub>2</sub> | 296.0694      |                                   |                    | ✓                  |                |

| DBP formula                                                                   | Theo. MW (Da) | Presence(s) of DBPs in this study |                    |                    |                |
|-------------------------------------------------------------------------------|---------------|-----------------------------------|--------------------|--------------------|----------------|
|                                                                               |               | RW-Cl <sub>2</sub>                | CW-Cl <sub>2</sub> | FW-Cl <sub>2</sub> | Finished water |
| C <sub>16</sub> H <sub>25</sub> ON <sub>2</sub> Cl                            | 296.1655      |                                   | ✓                  |                    |                |
| C <sub>16</sub> H <sub>11</sub> O <sub>2</sub> N <sub>2</sub> Cl              | 298.0509      |                                   |                    | ✓                  |                |
| C <sub>13</sub> H <sub>15</sub> O <sub>4</sub> N <sub>2</sub> Cl              | 298.0720      |                                   | ✓                  |                    |                |
| C <sub>13</sub> H <sub>17</sub> O <sub>4</sub> N <sub>2</sub> Cl              | 300.0877      |                                   | ✓                  |                    |                |
| C <sub>17</sub> H <sub>17</sub> ON <sub>2</sub> Cl                            | 300.1029      |                                   |                    | ✓                  |                |
| C <sub>9</sub> H <sub>13</sub> O <sub>3</sub> N <sub>2</sub> Cl <sub>3</sub>  | 301.9992      |                                   |                    |                    | ✓              |
| C <sub>14</sub> H <sub>20</sub> ON <sub>2</sub> Cl <sub>2</sub>               | 302.0953      |                                   | ✓                  |                    |                |
| C <sub>9</sub> H <sub>15</sub> O <sub>3</sub> N <sub>2</sub> Cl <sub>3</sub>  | 304.0148      |                                   |                    | ✓                  |                |
| C <sub>12</sub> H <sub>17</sub> O <sub>5</sub> N <sub>2</sub> Cl              | 304.0826      |                                   | ✓                  |                    |                |
| C <sub>17</sub> H <sub>21</sub> ON <sub>2</sub> Cl                            | 304.1342      |                                   | ✓                  |                    |                |
| C <sub>10</sub> H <sub>18</sub> O <sub>3</sub> NCl <sub>3</sub>               | 305.0352      |                                   |                    |                    | ✓              |
| C <sub>12</sub> H <sub>16</sub> O <sub>3</sub> N <sub>2</sub> Cl <sub>2</sub> | 306.0538      |                                   | ✓                  |                    |                |
| C <sub>14</sub> H <sub>24</sub> ON <sub>2</sub> Cl <sub>2</sub>               | 306.1266      |                                   | ✓                  |                    |                |
| C <sub>17</sub> H <sub>23</sub> ON <sub>2</sub> Cl                            | 306.1499      |                                   | ✓                  |                    |                |
| C <sub>12</sub> H <sub>15</sub> O <sub>4</sub> NCl <sub>2</sub>               | 307.0378      |                                   |                    |                    | ✓              |
| C <sub>11</sub> H <sub>11</sub> O <sub>2</sub> N <sub>2</sub> Cl <sub>3</sub> | 307.9886      | ✓                                 |                    |                    |                |
| C <sub>16</sub> H <sub>21</sub> O <sub>2</sub> N <sub>2</sub> Cl              | 308.1292      |                                   | ✓                  |                    |                |
| C <sub>17</sub> H <sub>25</sub> ON <sub>2</sub> Cl                            | 308.1655      |                                   | ✓                  |                    |                |
| C <sub>13</sub> H <sub>24</sub> O <sub>2</sub> N <sub>2</sub> Cl <sub>2</sub> | 310.1215      |                                   | ✓                  |                    |                |
| C <sub>16</sub> H <sub>23</sub> O <sub>2</sub> N <sub>2</sub> Cl              | 310.1448      |                                   | ✓                  |                    |                |
| C <sub>18</sub> H <sub>17</sub> ON <sub>2</sub> Cl                            | 312.1029      |                                   |                    | ✓                  |                |
| C <sub>11</sub> H <sub>21</sub> O <sub>6</sub> N <sub>2</sub> Cl              | 312.1088      |                                   | ✓                  |                    |                |
| C <sub>16</sub> H <sub>25</sub> O <sub>2</sub> N <sub>2</sub> Cl              | 312.1605      |                                   | ✓                  |                    |                |
| C <sub>17</sub> H <sub>12</sub> O <sub>3</sub> NCl                            | 313.0506      |                                   |                    |                    | ✓              |
| C <sub>14</sub> H <sub>19</sub> O <sub>4</sub> N <sub>2</sub> Cl              | 314.1033      |                                   | ✓                  |                    |                |
| C <sub>12</sub> H <sub>7</sub> O <sub>2</sub> N <sub>2</sub> Cl <sub>3</sub>  | 315.9573      | ✓                                 |                    |                    |                |
| C <sub>15</sub> H <sub>9</sub> O <sub>4</sub> N <sub>2</sub> Cl               | 316.0251      |                                   |                    | ✓                  |                |
| C <sub>16</sub> H <sub>13</sub> O <sub>3</sub> N <sub>2</sub> Cl              | 316.0615      |                                   |                    | ✓                  |                |
| C <sub>17</sub> H <sub>17</sub> O <sub>2</sub> N <sub>2</sub> Cl              | 316.0979      |                                   |                    | ✓                  |                |
| C <sub>15</sub> H <sub>25</sub> O <sub>3</sub> N <sub>2</sub> Cl              | 316.1554      |                                   | ✓                  |                    |                |
| C <sub>11</sub> H <sub>5</sub> O <sub>3</sub> N <sub>2</sub> Cl <sub>3</sub>  | 317.9366      | ✓                                 |                    |                    |                |
| C <sub>13</sub> H <sub>16</sub> O <sub>3</sub> N <sub>2</sub> Cl <sub>2</sub> | 318.0538      |                                   | ✓                  |                    |                |
| C <sub>18</sub> H <sub>23</sub> ON <sub>2</sub> Cl                            | 318.1499      |                                   | ✓                  |                    |                |
| C <sub>11</sub> H <sub>20</sub> O <sub>3</sub> NCl <sub>3</sub>               | 319.0509      |                                   | ✓                  |                    |                |
| C <sub>12</sub> H <sub>24</sub> O <sub>2</sub> NCl <sub>3</sub>               | 319.0873      |                                   | ✓                  |                    |                |
| C <sub>13</sub> H <sub>15</sub> ON <sub>2</sub> Cl <sub>3</sub>               | 320.0250      |                                   | ✓                  |                    |                |
| C <sub>10</sub> H <sub>19</sub> O <sub>3</sub> N <sub>2</sub> Cl <sub>3</sub> | 320.0461      |                                   |                    | ✓                  |                |
| C <sub>11</sub> H <sub>23</sub> O <sub>2</sub> N <sub>2</sub> Cl <sub>3</sub> | 320.0825      |                                   |                    | ✓                  |                |
| C <sub>18</sub> H <sub>25</sub> ON <sub>2</sub> Cl                            | 320.1655      |                                   | ✓                  |                    |                |

| DBP formula                                                                   | Theo. MW (Da) | Presence(s) of DBPs in this study |                    |                    |                |
|-------------------------------------------------------------------------------|---------------|-----------------------------------|--------------------|--------------------|----------------|
|                                                                               |               | RW-Cl <sub>2</sub>                | CW-Cl <sub>2</sub> | FW-Cl <sub>2</sub> | Finished water |
| C <sub>12</sub> H <sub>16</sub> O <sub>4</sub> N <sub>2</sub> Cl <sub>2</sub> | 322.0487      |                                   |                    |                    | ✓              |
| C <sub>10</sub> H <sub>21</sub> O <sub>3</sub> N <sub>2</sub> Cl <sub>3</sub> | 322.0618      |                                   |                    | ✓                  |                |
| C <sub>12</sub> H <sub>19</sub> O <sub>6</sub> N <sub>2</sub> Cl              | 322.0932      |                                   |                    |                    | ✓              |
| C <sub>17</sub> H <sub>23</sub> O <sub>2</sub> N <sub>2</sub> Cl              | 322.1448      |                                   | ✓                  |                    |                |
| C <sub>18</sub> H <sub>27</sub> ON <sub>2</sub> Cl                            | 322.1812      |                                   | ✓                  |                    |                |
| C <sub>12</sub> H <sub>18</sub> O <sub>4</sub> N <sub>2</sub> Cl <sub>2</sub> | 324.0644      |                                   |                    | ✓                  |                |
| C <sub>17</sub> H <sub>25</sub> O <sub>2</sub> N <sub>2</sub> Cl              | 324.1605      |                                   | ✓                  |                    |                |
| C <sub>13</sub> H <sub>24</sub> O <sub>6</sub> NCl                            | 325.1292      |                                   |                    |                    | ✓              |
| C <sub>12</sub> H <sub>17</sub> O <sub>2</sub> N <sub>2</sub> Cl <sub>3</sub> | 326.0356      | ✓                                 |                    |                    |                |
| C <sub>13</sub> H <sub>24</sub> O <sub>3</sub> N <sub>2</sub> Cl <sub>2</sub> | 326.1164      |                                   |                    | ✓                  |                |
| C <sub>17</sub> H <sub>13</sub> O <sub>3</sub> N <sub>2</sub> Cl              | 328.0615      |                                   |                    | ✓                  |                |
| C <sub>16</sub> H <sub>22</sub> ON <sub>2</sub> Cl <sub>2</sub>               | 328.1109      |                                   | ✓                  |                    |                |
| C <sub>16</sub> H <sub>25</sub> O <sub>3</sub> N <sub>2</sub> Cl              | 328.1554      |                                   | ✓                  |                    |                |
| C <sub>16</sub> H <sub>11</sub> O <sub>4</sub> N <sub>2</sub> Cl              | 330.0407      |                                   |                    |                    | ✓              |
| C <sub>17</sub> H <sub>15</sub> O <sub>3</sub> N <sub>2</sub> Cl              | 330.0771      |                                   |                    | ✓                  |                |
| C <sub>10</sub> H <sub>19</sub> O <sub>8</sub> N <sub>2</sub> Cl              | 330.0830      |                                   | ✓                  |                    |                |
| C <sub>16</sub> H <sub>24</sub> ON <sub>2</sub> Cl <sub>2</sub>               | 330.1266      |                                   | ✓                  |                    |                |
| C <sub>19</sub> H <sub>23</sub> ON <sub>2</sub> Cl                            | 330.1499      |                                   |                    | ✓                  |                |
| C <sub>12</sub> H <sub>20</sub> O <sub>3</sub> NCl <sub>3</sub>               | 331.0509      |                                   | ✓                  |                    |                |
| C <sub>10</sub> H <sub>15</sub> O <sub>4</sub> N <sub>2</sub> Cl <sub>3</sub> | 332.0097      |                                   |                    | ✓                  |                |
| C <sub>17</sub> H <sub>17</sub> O <sub>3</sub> N <sub>2</sub> Cl              | 332.0928      |                                   |                    | ✓                  |                |
| C <sub>19</sub> H <sub>25</sub> ON <sub>2</sub> Cl                            | 332.1655      |                                   | ✓                  |                    |                |
| C <sub>16</sub> H <sub>28</sub> ON <sub>2</sub> Cl <sub>2</sub>               | 334.1579      |                                   | ✓                  |                    |                |
| C <sub>16</sub> H <sub>17</sub> O <sub>4</sub> N <sub>2</sub> Cl              | 336.0877      |                                   |                    |                    | ✓              |
| C <sub>17</sub> H <sub>21</sub> O <sub>3</sub> N <sub>2</sub> Cl              | 336.1241      |                                   | ✓                  |                    |                |
| C <sub>14</sub> H <sub>25</sub> O <sub>5</sub> N <sub>2</sub> Cl              | 336.1452      |                                   |                    | ✓                  |                |
| C <sub>15</sub> H <sub>28</sub> O <sub>5</sub> NCl                            | 337.1656      |                                   | ✓                  |                    |                |
| C <sub>17</sub> H <sub>23</sub> O <sub>3</sub> N <sub>2</sub> Cl              | 338.1397      |                                   | ✓                  |                    |                |
| C <sub>18</sub> H <sub>27</sub> O <sub>2</sub> N <sub>2</sub> Cl              | 338.1761      |                                   | ✓                  |                    |                |
| C <sub>15</sub> H <sub>11</sub> ON <sub>2</sub> Cl <sub>3</sub>               | 339.9937      |                                   | ✓                  |                    |                |
| C <sub>13</sub> H <sub>19</sub> O <sub>2</sub> N <sub>2</sub> Cl <sub>3</sub> | 340.0512      |                                   | ✓                  |                    |                |
| C <sub>14</sub> H <sub>23</sub> ON <sub>2</sub> Cl <sub>3</sub>               | 340.0876      |                                   | ✓                  |                    |                |
| C <sub>14</sub> H <sub>26</sub> O <sub>3</sub> N <sub>2</sub> Cl <sub>2</sub> | 340.1320      |                                   |                    | ✓                  |                |
| C <sub>17</sub> H <sub>25</sub> O <sub>3</sub> N <sub>2</sub> Cl              | 340.1554      |                                   | ✓                  |                    |                |
| C <sub>18</sub> H <sub>29</sub> O <sub>2</sub> N <sub>2</sub> Cl              | 340.1918      |                                   | ✓                  |                    |                |
| C <sub>12</sub> H <sub>17</sub> O <sub>3</sub> N <sub>2</sub> Cl <sub>3</sub> | 342.0305      |                                   | ✓                  |                    |                |
| C <sub>17</sub> H <sub>24</sub> ON <sub>2</sub> Cl <sub>2</sub>               | 342.1266      |                                   | ✓                  |                    |                |
| C <sub>14</sub> H <sub>28</sub> O <sub>3</sub> N <sub>2</sub> Cl <sub>2</sub> | 342.1477      | ✓                                 |                    |                    |                |
| C <sub>17</sub> H <sub>27</sub> O <sub>3</sub> N <sub>2</sub> Cl              | 342.1710      |                                   | ✓                  |                    |                |

| DBP formula                                                                   | Theo. MW (Da) | Presence(s) of DBPs in this study |                    |                    |                |
|-------------------------------------------------------------------------------|---------------|-----------------------------------|--------------------|--------------------|----------------|
|                                                                               |               | RW-Cl <sub>2</sub>                | CW-Cl <sub>2</sub> | FW-Cl <sub>2</sub> | Finished water |
| C <sub>11</sub> H <sub>15</sub> O <sub>4</sub> N <sub>2</sub> Cl <sub>3</sub> | 344.0097      |                                   | ✓                  |                    |                |
| C <sub>18</sub> H <sub>17</sub> O <sub>3</sub> N <sub>2</sub> Cl              | 344.0928      |                                   |                    | ✓                  |                |
| C <sub>18</sub> H <sub>33</sub> O <sub>2</sub> N <sub>2</sub> Cl              | 344.2231      |                                   | ✓                  |                    |                |
| C <sub>19</sub> H <sub>20</sub> O <sub>3</sub> NCl                            | 345.1132      |                                   |                    | ✓                  |                |
| C <sub>14</sub> H <sub>13</sub> O <sub>2</sub> N <sub>2</sub> Cl <sub>3</sub> | 346.0043      |                                   |                    |                    | ✓              |
| C <sub>18</sub> H <sub>19</sub> O <sub>3</sub> N <sub>2</sub> Cl              | 346.1084      |                                   | ✓                  |                    |                |
| C <sub>20</sub> H <sub>27</sub> ON <sub>2</sub> Cl                            | 346.1812      |                                   | ✓                  |                    |                |
| C <sub>12</sub> H <sub>7</sub> O <sub>4</sub> N <sub>2</sub> Cl <sub>3</sub>  | 347.9471      |                                   |                    |                    | ✓              |
| C <sub>18</sub> H <sub>21</sub> O <sub>3</sub> N <sub>2</sub> Cl              | 348.1241      |                                   |                    |                    | ✓              |
| C <sub>11</sub> H <sub>21</sub> O <sub>4</sub> N <sub>2</sub> Cl <sub>3</sub> | 350.0567      |                                   |                    | ✓                  |                |
| C <sub>16</sub> H <sub>15</sub> O <sub>5</sub> N <sub>2</sub> Cl              | 350.0670      |                                   |                    |                    | ✓              |
| C <sub>17</sub> H <sub>19</sub> O <sub>4</sub> N <sub>2</sub> Cl              | 350.1033      |                                   |                    |                    | ✓              |
| C <sub>18</sub> H <sub>23</sub> O <sub>3</sub> N <sub>2</sub> Cl              | 350.1397      |                                   | ✓                  |                    |                |
| C <sub>19</sub> H <sub>27</sub> O <sub>2</sub> N <sub>2</sub> Cl              | 350.1761      |                                   | ✓                  |                    |                |
| C <sub>14</sub> H <sub>22</sub> O <sub>7</sub> NCl                            | 351.1085      |                                   |                    |                    | ✓              |
| C <sub>17</sub> H <sub>21</sub> O <sub>4</sub> N <sub>2</sub> Cl              | 352.1190      |                                   | ✓                  |                    |                |
| C <sub>18</sub> H <sub>25</sub> O <sub>3</sub> N <sub>2</sub> Cl              | 352.1554      |                                   | ✓                  |                    |                |
| C <sub>19</sub> H <sub>29</sub> O <sub>2</sub> N <sub>2</sub> Cl              | 352.1918      |                                   | ✓                  |                    |                |
| C <sub>12</sub> H <sub>13</sub> O <sub>4</sub> N <sub>2</sub> Cl <sub>3</sub> | 353.9941      | ✓                                 |                    |                    |                |
| C <sub>19</sub> H <sub>15</sub> O <sub>3</sub> N <sub>2</sub> Cl              | 354.0771      |                                   |                    |                    | ✓              |
| C <sub>14</sub> H <sub>24</sub> O <sub>4</sub> N <sub>2</sub> Cl <sub>2</sub> | 354.1113      |                                   |                    | ✓                  |                |
| C <sub>20</sub> H <sub>19</sub> O <sub>2</sub> N <sub>2</sub> Cl              | 354.1135      |                                   |                    | ✓                  |                |
| C <sub>18</sub> H <sub>27</sub> O <sub>3</sub> N <sub>2</sub> Cl              | 354.1710      |                                   | ✓                  |                    |                |
| C <sub>20</sub> H <sub>21</sub> O <sub>2</sub> N <sub>2</sub> Cl              | 356.1292      |                                   |                    | ✓                  |                |
| C <sub>14</sub> H <sub>12</sub> O <sub>5</sub> N <sub>2</sub> Cl <sub>2</sub> | 358.0123      |                                   |                    |                    | ✓              |
| C <sub>18</sub> H <sub>28</sub> ON <sub>2</sub> Cl <sub>2</sub>               | 358.1579      |                                   | ✓                  |                    |                |
| C <sub>18</sub> H <sub>17</sub> O <sub>4</sub> N <sub>2</sub> Cl              | 360.0877      |                                   |                    | ✓                  |                |
| C <sub>10</sub> H <sub>3</sub> O <sub>11</sub> N <sub>2</sub> Cl              | 361.9425      |                                   |                    |                    | ✓              |
| C <sub>16</sub> H <sub>11</sub> O <sub>6</sub> N <sub>2</sub> Cl              | 362.0306      |                                   |                    |                    | ✓              |
| C <sub>14</sub> H <sub>16</sub> O <sub>5</sub> N <sub>2</sub> Cl <sub>2</sub> | 362.0436      |                                   |                    | ✓                  |                |
| C <sub>14</sub> H <sub>19</sub> O <sub>7</sub> N <sub>2</sub> Cl              | 362.0881      |                                   |                    |                    | ✓              |
| C <sub>18</sub> H <sub>19</sub> O <sub>4</sub> N <sub>2</sub> Cl              | 362.1033      |                                   |                    | ✓                  |                |
| C <sub>18</sub> H <sub>21</sub> O <sub>4</sub> N <sub>2</sub> Cl              | 364.1190      |                                   | ✓                  |                    |                |
| C <sub>18</sub> H <sub>23</sub> O <sub>4</sub> N <sub>2</sub> Cl              | 366.1346      |                                   | ✓                  |                    |                |
| C <sub>19</sub> H <sub>27</sub> O <sub>3</sub> N <sub>2</sub> Cl              | 366.1710      |                                   | ✓                  |                    |                |
| C <sub>15</sub> H <sub>20</sub> O <sub>3</sub> NCl <sub>3</sub>               | 367.0509      |                                   | ✓                  |                    |                |
| C <sub>14</sub> H <sub>22</sub> O <sub>5</sub> N <sub>2</sub> Cl <sub>2</sub> | 368.0906      |                                   |                    | ✓                  |                |
| C <sub>18</sub> H <sub>25</sub> O <sub>4</sub> N <sub>2</sub> Cl              | 368.1503      |                                   |                    |                    | ✓              |
| C <sub>16</sub> H <sub>16</sub> O <sub>4</sub> N <sub>2</sub> Cl <sub>2</sub> | 370.0487      |                                   |                    | ✓                  |                |



| DBP formula                                                                   | Theo. MW (Da) | Presence(s) of DBPs in this study |                    |                    |                |
|-------------------------------------------------------------------------------|---------------|-----------------------------------|--------------------|--------------------|----------------|
|                                                                               |               | RW-Cl <sub>2</sub>                | CW-Cl <sub>2</sub> | FW-Cl <sub>2</sub> | Finished water |
| C <sub>15</sub> H <sub>15</sub> O <sub>7</sub> N <sub>2</sub> Cl              | 370.0568      |                                   | ✓                  |                    |                |
| C <sub>19</sub> H <sub>28</sub> ON <sub>2</sub> Cl <sub>2</sub>               | 370.1579      |                                   | ✓                  |                    |                |
| C <sub>18</sub> H <sub>27</sub> O <sub>4</sub> N <sub>2</sub> Cl              | 370.1659      |                                   | ✓                  |                    |                |
| C <sub>19</sub> H <sub>17</sub> O <sub>4</sub> N <sub>2</sub> Cl              | 372.0877      |                                   |                    | ✓                  |                |
| C <sub>16</sub> H <sub>21</sub> O <sub>6</sub> N <sub>2</sub> Cl              | 372.1088      |                                   | ✓                  |                    |                |
| C <sub>18</sub> H <sub>29</sub> O <sub>4</sub> N <sub>2</sub> Cl              | 372.1816      | ✓                                 |                    |                    |                |
| C <sub>19</sub> H <sub>19</sub> O <sub>4</sub> N <sub>2</sub> Cl              | 374.1033      |                                   |                    | ✓                  |                |
| C <sub>12</sub> H <sub>25</sub> O <sub>9</sub> N <sub>2</sub> Cl              | 376.1249      |                                   | ✓                  |                    |                |
| C <sub>16</sub> H <sub>11</sub> O <sub>7</sub> N <sub>2</sub> Cl              | 378.0255      |                                   | ✓                  |                    |                |
| C <sub>20</sub> H <sub>27</sub> O <sub>3</sub> N <sub>2</sub> Cl              | 378.1710      | ✓                                 |                    |                    |                |
| C <sub>17</sub> H <sub>17</sub> O <sub>6</sub> N <sub>2</sub> Cl              | 380.0775      |                                   |                    |                    | ✓              |
| C <sub>20</sub> H <sub>29</sub> O <sub>3</sub> N <sub>2</sub> Cl              | 380.1867      |                                   | ✓                  |                    |                |
| C <sub>16</sub> H <sub>22</sub> O <sub>3</sub> NCl <sub>3</sub>               | 381.0665      |                                   |                    | ✓                  |                |
| C <sub>11</sub> H <sub>21</sub> O <sub>6</sub> N <sub>2</sub> Cl <sub>3</sub> | 382.0465      |                                   |                    | ✓                  |                |
| C <sub>20</sub> H <sub>15</sub> O <sub>4</sub> N <sub>2</sub> Cl              | 382.0720      |                                   |                    |                    | ✓              |
| C <sub>19</sub> H <sub>29</sub> O <sub>4</sub> N <sub>2</sub> Cl              | 384.1816      |                                   | ✓                  |                    |                |
| C <sub>20</sub> H <sub>19</sub> O <sub>4</sub> N <sub>2</sub> Cl              | 386.1033      |                                   |                    | ✓                  |                |
| C <sub>17</sub> H <sub>23</sub> O <sub>6</sub> N <sub>2</sub> Cl              | 386.1245      |                                   | ✓                  |                    |                |
| C <sub>21</sub> H <sub>23</sub> O <sub>3</sub> N <sub>2</sub> Cl              | 386.1397      |                                   |                    | ✓                  |                |
| C <sub>19</sub> H <sub>31</sub> O <sub>4</sub> N <sub>2</sub> Cl              | 386.1972      |                                   | ✓                  |                    |                |
| C <sub>18</sub> H <sub>29</sub> O <sub>5</sub> N <sub>2</sub> Cl              | 388.1765      | ✓                                 |                    |                    |                |
| C <sub>12</sub> H <sub>20</sub> O <sub>11</sub> NCl                           | 389.0725      |                                   |                    |                    | ✓              |
| C <sub>13</sub> H <sub>24</sub> O <sub>10</sub> NCl                           | 389.1089      |                                   |                    |                    | ✓              |
| C <sub>17</sub> H <sub>11</sub> O <sub>7</sub> N <sub>2</sub> Cl              | 390.0255      |                                   | ✓                  |                    |                |
| C <sub>18</sub> H <sub>15</sub> O <sub>6</sub> N <sub>2</sub> Cl              | 390.0619      |                                   |                    |                    | ✓              |
| C <sub>20</sub> H <sub>23</sub> O <sub>4</sub> N <sub>2</sub> Cl              | 390.1346      |                                   |                    | ✓                  |                |
| C <sub>17</sub> H <sub>27</sub> O <sub>6</sub> N <sub>2</sub> Cl              | 390.1558      |                                   | ✓                  |                    |                |
| C <sub>14</sub> H <sub>27</sub> O <sub>4</sub> N <sub>2</sub> Cl <sub>3</sub> | 392.1036      | ✓                                 |                    |                    |                |
| C <sub>13</sub> H <sub>25</sub> O <sub>8</sub> NCl <sub>2</sub>               | 393.0957      |                                   |                    |                    | ✓              |
| C <sub>17</sub> H <sub>9</sub> O <sub>3</sub> N <sub>2</sub> Cl <sub>3</sub>  | 393.9679      |                                   |                    |                    | ✓              |
| C <sub>15</sub> H <sub>17</sub> O <sub>4</sub> N <sub>2</sub> Cl <sub>3</sub> | 394.0254      | ✓                                 |                    |                    |                |
| C <sub>19</sub> H <sub>27</sub> O <sub>5</sub> N <sub>2</sub> Cl              | 398.1609      |                                   | ✓                  |                    |                |
| C <sub>20</sub> H <sub>31</sub> O <sub>4</sub> N <sub>2</sub> Cl              | 398.1972      |                                   | ✓                  |                    |                |
| C <sub>15</sub> H <sub>26</sub> O <sub>9</sub> NCl                            | 399.1296      |                                   | ✓                  |                    |                |
| C <sub>18</sub> H <sub>21</sub> O <sub>2</sub> N <sub>2</sub> Cl <sub>3</sub> | 402.0669      |                                   | ✓                  |                    |                |
| C <sub>18</sub> H <sub>27</sub> O <sub>6</sub> N <sub>2</sub> Cl              | 402.1558      |                                   |                    |                    | ✓              |
| C <sub>12</sub> H <sub>23</sub> O <sub>11</sub> N <sub>2</sub> Cl             | 406.0990      |                                   | ✓                  |                    |                |
| C <sub>16</sub> H <sub>19</sub> O <sub>4</sub> N <sub>2</sub> Cl <sub>3</sub> | 408.0410      |                                   |                    | ✓                  |                |
| C <sub>18</sub> H <sub>19</sub> O <sub>7</sub> N <sub>2</sub> Cl              | 410.0881      |                                   |                    |                    | ✓              |

| DBP formula                                                                    | Theo. MW (Da) | Presence(s) of DBPs in this study |                    |                    |                |
|--------------------------------------------------------------------------------|---------------|-----------------------------------|--------------------|--------------------|----------------|
|                                                                                |               | RW-Cl <sub>2</sub>                | CW-Cl <sub>2</sub> | FW-Cl <sub>2</sub> | Finished water |
| C <sub>21</sub> H <sub>31</sub> O <sub>4</sub> N <sub>2</sub> Cl               | 410.1972      |                                   | ✓                  |                    |                |
| C <sub>20</sub> H <sub>29</sub> O <sub>5</sub> N <sub>2</sub> Cl               | 412.1765      |                                   | ✓                  |                    |                |
| C <sub>20</sub> H <sub>31</sub> O <sub>5</sub> N <sub>2</sub> Cl               | 414.1922      |                                   | ✓                  |                    |                |
| C <sub>16</sub> H <sub>30</sub> O <sub>9</sub> NCl                             | 415.1609      |                                   | ✓                  |                    |                |
| C <sub>18</sub> H <sub>21</sub> O <sub>3</sub> N <sub>2</sub> Cl <sub>3</sub>  | 418.0618      |                                   | ✓                  |                    |                |
| C <sub>14</sub> H <sub>27</sub> O <sub>10</sub> N <sub>2</sub> Cl              | 418.1354      |                                   | ✓                  |                    |                |
| C <sub>17</sub> H <sub>17</sub> O <sub>9</sub> N <sub>2</sub> Cl               | 428.0623      |                                   | ✓                  |                    |                |
| C <sub>17</sub> H <sub>27</sub> O <sub>9</sub> N <sub>2</sub> Cl               | 438.1405      |                                   |                    |                    | ✓              |
| C <sub>21</sub> H <sub>27</sub> O <sub>6</sub> N <sub>2</sub> Cl               | 438.1558      |                                   | ✓                  |                    |                |
| C <sub>18</sub> H <sub>23</sub> O <sub>7</sub> N <sub>2</sub> Cl <sub>3</sub>  | 484.0571      |                                   | ✓                  |                    |                |
| C <sub>17</sub> H <sub>29</sub> O <sub>13</sub> N <sub>2</sub> Cl              | 504.1358      |                                   |                    | ✓                  |                |
| C <sub>15</sub> H <sub>19</sub> O <sub>11</sub> N <sub>2</sub> Cl <sub>3</sub> | 508.0054      | ✓                                 |                    |                    |                |
| C <sub>32</sub> H <sub>32</sub> O <sub>8</sub> NCl                             | 593.1816      |                                   | ✓                  |                    |                |
| C <sub>35</sub> H <sub>50</sub> O <sub>12</sub> NCl                            | 711.3022      |                                   |                    | ✓                  |                |

1 **Table S6** Complete list of CHO precursors and their fates during water treatment processes

| Precursors                                     | Changes in intensities between two consecutive processes |              |                   | Formation mechanism | DBPs                                                           |
|------------------------------------------------|----------------------------------------------------------|--------------|-------------------|---------------------|----------------------------------------------------------------|
|                                                | RW→CW                                                    | CW→FW        | FW→Finished water |                     |                                                                |
| C <sub>9</sub> H <sub>8</sub> O <sub>4</sub>   | Constant                                                 | Increased    | Constant          | ES                  | C <sub>9</sub> H <sub>7</sub> O <sub>4</sub> Cl                |
| C <sub>12</sub> H <sub>10</sub> O <sub>3</sub> | Disappeared                                              | Newly Formed | Constant          | ES                  | C <sub>12</sub> H <sub>9</sub> O <sub>3</sub> Cl               |
| C <sub>7</sub> H <sub>16</sub> O <sub>7</sub>  | Constant                                                 | Increased    | Constant          | ES                  | C <sub>7</sub> H <sub>15</sub> O <sub>7</sub> Cl               |
| C <sub>12</sub> H <sub>12</sub> O <sub>4</sub> | Decreased                                                | Increased    | Constant          | ES                  | C <sub>12</sub> H <sub>11</sub> O <sub>4</sub> Cl              |
| C <sub>13</sub> H <sub>10</sub> O <sub>5</sub> | Decreased                                                | Increased    | Constant          | ES                  | C <sub>13</sub> H <sub>9</sub> O <sub>5</sub> Cl               |
| C <sub>11</sub> H <sub>6</sub> O <sub>7</sub>  | Increased                                                | Increased    | Constant          | ES                  | C <sub>11</sub> H <sub>5</sub> O <sub>7</sub> Cl               |
| C <sub>12</sub> H <sub>10</sub> O <sub>6</sub> | Constant                                                 | Increased    | Constant          | ES                  | C <sub>12</sub> H <sub>9</sub> O <sub>6</sub> Cl               |
| C <sub>8</sub> H <sub>14</sub> O <sub>9</sub>  | Newly Formed                                             | Increased    | Constant          | ES                  | C <sub>8</sub> H <sub>13</sub> O <sub>9</sub> Cl               |
| C <sub>10</sub> H <sub>10</sub> O <sub>6</sub> | Decreased                                                | Increased    | Constant          | ES                  | C <sub>10</sub> H <sub>9</sub> O <sub>6</sub> Cl               |
| C <sub>13</sub> H <sub>12</sub> O <sub>6</sub> | Decreased                                                | Increased    | Constant          | ES                  | C <sub>13</sub> H <sub>11</sub> O <sub>6</sub> Cl              |
| C <sub>12</sub> H <sub>18</sub> O <sub>7</sub> | Disappeared                                              | Newly Formed | Constant          | ES                  | C <sub>12</sub> H <sub>17</sub> O <sub>7</sub> Cl              |
| C <sub>18</sub> H <sub>12</sub> O <sub>3</sub> | Disappeared                                              | Newly Formed | Increased         | ES                  | C <sub>18</sub> H <sub>11</sub> O <sub>3</sub> Cl              |
| C <sub>15</sub> H <sub>24</sub> O <sub>5</sub> | Newly Formed                                             | Disappeared  | Newly Formed      | ES                  | C <sub>15</sub> H <sub>23</sub> O <sub>5</sub> Cl              |
| C <sub>11</sub> H <sub>10</sub> O <sub>7</sub> | Constant                                                 | Increased    | Constant          | ES                  | C <sub>11</sub> H <sub>8</sub> O <sub>7</sub> Cl <sub>2</sub>  |
| C <sub>12</sub> H <sub>18</sub> O <sub>8</sub> | Disappeared                                              | Newly Formed | Constant          | ES                  | C <sub>12</sub> H <sub>17</sub> O <sub>8</sub> Cl              |
| C <sub>14</sub> H <sub>24</sub> O <sub>7</sub> | Constant                                                 | Constant     | Increased         | ES                  | C <sub>14</sub> H <sub>23</sub> O <sub>7</sub> Cl              |
| C <sub>12</sub> H <sub>26</sub> O <sub>9</sub> | Constant                                                 | Decreased    | Decreased         | ES                  | C <sub>12</sub> H <sub>25</sub> O <sub>9</sub> Cl              |
| C <sub>16</sub> H <sub>32</sub> O <sub>3</sub> | Decreased                                                | Increased    | Constant          | ES                  | C <sub>16</sub> H <sub>30</sub> O <sub>3</sub> Cl <sub>2</sub> |
| C <sub>16</sub> H <sub>24</sub> O <sub>8</sub> | Newly Formed                                             | Disappeared  | ND                | ES                  | C <sub>16</sub> H <sub>23</sub> O <sub>8</sub> Cl              |
| C <sub>19</sub> H <sub>26</sub> O <sub>6</sub> | Newly Formed                                             | Disappeared  | ND                | ES                  | C <sub>19</sub> H <sub>25</sub> O <sub>6</sub> Cl              |
| C <sub>18</sub> H <sub>32</sub> O <sub>3</sub> | Constant                                                 | Constant     | Constant          | ES                  | C <sub>18</sub> H <sub>29</sub> O <sub>3</sub> Cl <sub>3</sub> |
| C <sub>19</sub> H <sub>28</sub> O <sub>7</sub> | Decreased                                                | Increased    | Decreased         | ES                  | C <sub>19</sub> H <sub>27</sub> O <sub>7</sub> Cl              |
| C <sub>12</sub> H <sub>12</sub> O <sub>7</sub> | Decreased                                                | Increased    | Increased         | ES                  | C <sub>12</sub> H <sub>11</sub> O <sub>7</sub> Cl              |
| C <sub>12</sub> H <sub>14</sub> O <sub>7</sub> | Decreased                                                | Increased    | Constant          | ES                  | C <sub>12</sub> H <sub>13</sub> O <sub>7</sub> Cl              |
| C <sub>14</sub> H <sub>22</sub> O <sub>5</sub> | Decreased                                                | Increased    | Constant          | ES                  | C <sub>14</sub> H <sub>21</sub> O <sub>5</sub> Cl              |
| C <sub>11</sub> H <sub>10</sub> O <sub>6</sub> | Decreased                                                | Increased    | Constant          | ES                  | C <sub>11</sub> H <sub>8</sub> O <sub>6</sub> Cl <sub>2</sub>  |
| C <sub>11</sub> H <sub>12</sub> O <sub>8</sub> | Disappeared                                              | Newly Formed | Constant          | ES                  | C <sub>11</sub> H <sub>11</sub> O <sub>8</sub> Cl              |
| C <sub>10</sub> H <sub>10</sub> O <sub>7</sub> | Decreased                                                | Constant     | Constant          | ES                  | C <sub>10</sub> H <sub>9</sub> O <sub>7</sub> Cl               |
| C <sub>13</sub> H <sub>14</sub> O <sub>7</sub> | Decreased                                                | Increased    | Constant          | ES                  | C <sub>13</sub> H <sub>13</sub> O <sub>7</sub> Cl              |
| C <sub>13</sub> H <sub>26</sub> O <sub>2</sub> | Disappeared                                              | Newly Formed | Constant          | ES                  | C <sub>13</sub> H <sub>23</sub> O <sub>2</sub> Cl <sub>3</sub> |
| C <sub>13</sub> H <sub>16</sub> O <sub>7</sub> | Decreased                                                | Increased    | Constant          | ES                  | C <sub>13</sub> H <sub>15</sub> O <sub>7</sub> Cl              |
| C <sub>12</sub> H <sub>16</sub> O <sub>8</sub> | Decreased                                                | Increased    | Constant          | ES                  | C <sub>12</sub> H <sub>15</sub> O <sub>8</sub> Cl              |
| C <sub>14</sub> H <sub>24</sub> O <sub>2</sub> | Decreased                                                | Increased    | Constant          | ES                  | C <sub>14</sub> H <sub>23</sub> O <sub>2</sub> Cl              |
| C <sub>12</sub> H <sub>10</sub> O <sub>9</sub> | ND                                                       | Newly Formed | Increased         | ES                  | C <sub>12</sub> H <sub>9</sub> O <sub>9</sub> Cl               |
| C <sub>12</sub> H <sub>26</sub> O <sub>8</sub> | Constant                                                 | Constant     | Constant          | ES                  | C <sub>12</sub> H <sub>25</sub> O <sub>8</sub> Cl              |
| C <sub>14</sub> H <sub>16</sub> O <sub>8</sub> | Decreased                                                | Increased    | Constant          | ES                  | C <sub>14</sub> H <sub>15</sub> O <sub>8</sub> Cl              |
| C <sub>15</sub> H <sub>20</sub> O <sub>7</sub> | Decreased                                                | Increased    | Constant          | ES                  | C <sub>15</sub> H <sub>19</sub> O <sub>7</sub> Cl              |

| Precursors                                      | Changes in intensities between two consecutive processes |              |                   | Formation mechanism | DBPs                                                           |
|-------------------------------------------------|----------------------------------------------------------|--------------|-------------------|---------------------|----------------------------------------------------------------|
|                                                 | RW→CW                                                    | CW→FW        | FW→Finished water |                     |                                                                |
| C <sub>15</sub> H <sub>14</sub> O <sub>8</sub>  | Decreased                                                | Increased    | Constant          | ES                  | C <sub>15</sub> H <sub>13</sub> O <sub>8</sub> Cl              |
| C <sub>17</sub> H <sub>26</sub> O <sub>6</sub>  | Decreased                                                | Constant     | Constant          | ES                  | C <sub>17</sub> H <sub>25</sub> O <sub>6</sub> Cl              |
| C <sub>15</sub> H <sub>20</sub> O <sub>8</sub>  | Decreased                                                | Constant     | Constant          | ES                  | C <sub>15</sub> H <sub>19</sub> O <sub>8</sub> Cl              |
| C <sub>14</sub> H <sub>16</sub> O <sub>7</sub>  | Decreased                                                | Increased    | Constant          | ES                  | C <sub>14</sub> H <sub>14</sub> O <sub>7</sub> Cl <sub>2</sub> |
| C <sub>17</sub> H <sub>18</sub> O <sub>7</sub>  | Disappeared                                              | Newly Formed | Constant          | ES                  | C <sub>17</sub> H <sub>17</sub> O <sub>7</sub> Cl              |
| C <sub>20</sub> H <sub>30</sub> O <sub>6</sub>  | Decreased                                                | Increased    | Constant          | ES                  | C <sub>20</sub> H <sub>29</sub> O <sub>6</sub> Cl              |
| C <sub>17</sub> H <sub>22</sub> O <sub>7</sub>  | Decreased                                                | Constant     | Constant          | ES                  | C <sub>17</sub> H <sub>20</sub> O <sub>7</sub> Cl <sub>2</sub> |
| C <sub>16</sub> H <sub>18</sub> O <sub>9</sub>  | Disappeared                                              | Newly Formed | Constant          | ES                  | C <sub>16</sub> H <sub>16</sub> O <sub>9</sub> Cl <sub>2</sub> |
| C <sub>18</sub> H <sub>24</sub> O <sub>10</sub> | Decreased                                                | Decreased    | Constant          | ES                  | C <sub>18</sub> H <sub>23</sub> O <sub>10</sub> Cl             |
| C <sub>16</sub> H <sub>22</sub> O <sub>5</sub>  | Disappeared                                              | ND           | Newly Formed      | ES                  | C <sub>16</sub> H <sub>21</sub> O <sub>5</sub> Cl              |
| C <sub>15</sub> H <sub>22</sub> O <sub>4</sub>  | Decreased                                                | Constant     | Constant          | ES                  | C <sub>15</sub> H <sub>21</sub> O <sub>4</sub> Cl              |
| C <sub>12</sub> H <sub>14</sub> O <sub>9</sub>  | Decreased                                                | Constant     | Constant          | ES                  | C <sub>12</sub> H <sub>13</sub> O <sub>9</sub> Cl              |
| C <sub>14</sub> H <sub>20</sub> O <sub>4</sub>  | Decreased                                                | Constant     | Constant          | ES                  | C <sub>14</sub> H <sub>19</sub> O <sub>4</sub> Cl              |
| C <sub>17</sub> H <sub>22</sub> O <sub>6</sub>  | Decreased                                                | Constant     | Decreased         | ES                  | C <sub>17</sub> H <sub>21</sub> O <sub>6</sub> Cl              |
| C <sub>12</sub> H <sub>16</sub> O <sub>7</sub>  | Decreased                                                | Increased    | Increased         | ES                  | C <sub>12</sub> H <sub>14</sub> O <sub>7</sub> Cl <sub>2</sub> |
| C <sub>16</sub> H <sub>20</sub> O <sub>6</sub>  | Decreased                                                | Constant     | Increased         | ES                  | C <sub>16</sub> H <sub>19</sub> O <sub>6</sub> Cl              |
| C <sub>17</sub> H <sub>28</sub> O <sub>5</sub>  | Decreased                                                | Increased    | Constant          | ES                  | C <sub>17</sub> H <sub>27</sub> O <sub>5</sub> Cl              |
| C <sub>9</sub> H <sub>6</sub> O <sub>3</sub>    | Constant                                                 | Increased    | Constant          | AR                  | C <sub>9</sub> H <sub>7</sub> O <sub>4</sub> Cl                |
| C <sub>12</sub> H <sub>10</sub> O <sub>3</sub>  | Decreased                                                | Increased    | Constant          | AR                  | C <sub>12</sub> H <sub>11</sub> O <sub>4</sub> Cl              |
| C <sub>9</sub> H <sub>4</sub> O <sub>6</sub>    | Constant                                                 | Increased    | Constant          | AR                  | C <sub>9</sub> H <sub>5</sub> O <sub>7</sub> Cl                |
| C <sub>12</sub> H <sub>8</sub> O <sub>5</sub>   | Constant                                                 | Increased    | Constant          | AR                  | C <sub>12</sub> H <sub>9</sub> O <sub>6</sub> Cl               |
| C <sub>13</sub> H <sub>10</sub> O <sub>5</sub>  | Decreased                                                | Increased    | Constant          | AR                  | C <sub>13</sub> H <sub>11</sub> O <sub>6</sub> Cl              |
| C <sub>12</sub> H <sub>16</sub> O <sub>6</sub>  | Disappeared                                              | Newly Formed | Constant          | AR                  | C <sub>12</sub> H <sub>17</sub> O <sub>7</sub> Cl              |
| C <sub>15</sub> H <sub>22</sub> O <sub>4</sub>  | Newly Formed                                             | Disappeared  | Newly Formed      | AR                  | C <sub>15</sub> H <sub>23</sub> O <sub>5</sub> Cl              |
| C <sub>12</sub> H <sub>16</sub> O <sub>7</sub>  | Disappeared                                              | Newly Formed | Constant          | AR                  | C <sub>12</sub> H <sub>17</sub> O <sub>8</sub> Cl              |
| C <sub>14</sub> H <sub>20</sub> O <sub>6</sub>  | Newly Formed                                             | Disappeared  | Newly Formed      | AR                  | C <sub>14</sub> H <sub>21</sub> O <sub>7</sub> Cl              |
| C <sub>14</sub> H <sub>22</sub> O <sub>6</sub>  | Constant                                                 | Constant     | Increased         | AR                  | C <sub>14</sub> H <sub>23</sub> O <sub>7</sub> Cl              |
| C <sub>17</sub> H <sub>24</sub> O <sub>5</sub>  | Decreased                                                | Constant     | Constant          | AR                  | C <sub>17</sub> H <sub>25</sub> O <sub>6</sub> Cl              |
| C <sub>18</sub> H <sub>28</sub> O <sub>7</sub>  | Newly Formed                                             | Disappeared  | ND                | AR                  | C <sub>18</sub> H <sub>29</sub> O <sub>8</sub> Cl              |
| C <sub>10</sub> H <sub>8</sub> O <sub>5</sub>   | Decreased                                                | Increased    | Constant          | AR                  | C <sub>10</sub> H <sub>9</sub> O <sub>6</sub> Cl               |
| C <sub>11</sub> H <sub>18</sub> O <sub>5</sub>  | Constant                                                 | Disappeared  | ND                | AR                  | C <sub>11</sub> H <sub>19</sub> O <sub>6</sub> Cl              |
| C <sub>12</sub> H <sub>10</sub> O <sub>5</sub>  | Decreased                                                | Increased    | Constant          | AR                  | C <sub>12</sub> H <sub>11</sub> O <sub>6</sub> Cl              |
| C <sub>11</sub> H <sub>10</sub> O <sub>6</sub>  | Decreased                                                | Increased    | Constant          | AR                  | C <sub>11</sub> H <sub>11</sub> O <sub>7</sub> Cl              |
| C <sub>16</sub> H <sub>16</sub> O <sub>2</sub>  | Decreased                                                | Increased    | Disappeared       | AR                  | C <sub>16</sub> H <sub>17</sub> O <sub>3</sub> Cl              |
| C <sub>12</sub> H <sub>10</sub> O <sub>6</sub>  | Decreased                                                | Increased    | Increased         | AR                  | C <sub>12</sub> H <sub>11</sub> O <sub>7</sub> Cl              |
| C <sub>12</sub> H <sub>12</sub> O <sub>6</sub>  | Decreased                                                | Increased    | Constant          | AR                  | C <sub>12</sub> H <sub>13</sub> O <sub>7</sub> Cl              |
| C <sub>14</sub> H <sub>20</sub> O <sub>4</sub>  | Decreased                                                | Increased    | Constant          | AR                  | C <sub>14</sub> H <sub>21</sub> O <sub>5</sub> Cl              |
| C <sub>11</sub> H <sub>10</sub> O <sub>7</sub>  | Disappeared                                              | Newly Formed | Constant          | AR                  | C <sub>11</sub> H <sub>11</sub> O <sub>8</sub> Cl              |
| C <sub>10</sub> H <sub>6</sub> O <sub>5</sub>   | Constant                                                 | Increased    | Constant          | AR                  | C <sub>10</sub> H <sub>7</sub> O <sub>6</sub> Cl               |

| Precursors                                     | Changes in intensities between two consecutive processes |              |                   | Formation mechanism | DBPs                                                           |
|------------------------------------------------|----------------------------------------------------------|--------------|-------------------|---------------------|----------------------------------------------------------------|
|                                                | RW→CW                                                    | CW→FW        | FW→Finished water |                     |                                                                |
| C <sub>12</sub> H <sub>22</sub> O <sub>6</sub> | Decreased                                                | Increased    | Constant          | AR                  | C <sub>12</sub> H <sub>23</sub> O <sub>7</sub> Cl              |
| C <sub>13</sub> H <sub>12</sub> O <sub>6</sub> | Decreased                                                | Increased    | Constant          | AR                  | C <sub>13</sub> H <sub>13</sub> O <sub>7</sub> Cl              |
| C <sub>13</sub> H <sub>14</sub> O <sub>6</sub> | Decreased                                                | Increased    | Constant          | AR                  | C <sub>13</sub> H <sub>15</sub> O <sub>7</sub> Cl              |
| C <sub>12</sub> H <sub>14</sub> O <sub>7</sub> | Decreased                                                | Increased    | Constant          | AR                  | C <sub>12</sub> H <sub>15</sub> O <sub>8</sub> Cl              |
| C <sub>14</sub> H <sub>14</sub> O <sub>7</sub> | Decreased                                                | Increased    | Constant          | AR                  | C <sub>14</sub> H <sub>15</sub> O <sub>8</sub> Cl              |
| C <sub>15</sub> H <sub>18</sub> O <sub>6</sub> | Decreased                                                | Increased    | Constant          | AR                  | C <sub>15</sub> H <sub>19</sub> O <sub>7</sub> Cl              |
| C <sub>12</sub> H <sub>8</sub> O <sub>6</sub>  | Constant                                                 | Increased    | Constant          | AR                  | C <sub>12</sub> H <sub>10</sub> O <sub>8</sub> Cl <sub>2</sub> |
| C <sub>13</sub> H <sub>12</sub> O <sub>5</sub> | Decreased                                                | Increased    | Constant          | AR                  | C <sub>13</sub> H <sub>14</sub> O <sub>7</sub> Cl <sub>2</sub> |
| C <sub>15</sub> H <sub>18</sub> O <sub>7</sub> | Decreased                                                | Constant     | Constant          | AR                  | C <sub>15</sub> H <sub>19</sub> O <sub>8</sub> Cl              |
| C <sub>17</sub> H <sub>16</sub> O <sub>6</sub> | Disappeared                                              | Newly Formed | Constant          | AR                  | C <sub>17</sub> H <sub>17</sub> O <sub>7</sub> Cl              |
| C <sub>20</sub> H <sub>28</sub> O <sub>5</sub> | Decreased                                                | Increased    | Constant          | AR                  | C <sub>20</sub> H <sub>29</sub> O <sub>6</sub> Cl              |
| C <sub>16</sub> H <sub>14</sub> O <sub>7</sub> | Disappeared                                              | Newly Formed | Constant          | AR                  | C <sub>16</sub> H <sub>16</sub> O <sub>9</sub> Cl <sub>2</sub> |
| C <sub>18</sub> H <sub>22</sub> O <sub>9</sub> | Decreased                                                | Decreased    | Constant          | AR                  | C <sub>18</sub> H <sub>23</sub> O <sub>10</sub> Cl             |
| C <sub>12</sub> H <sub>12</sub> O <sub>8</sub> | Decreased                                                | Constant     | Constant          | AR                  | C <sub>12</sub> H <sub>13</sub> O <sub>9</sub> Cl              |
| C <sub>11</sub> H <sub>12</sub> O <sub>9</sub> | ND                                                       | Newly Formed | Constant          | AR                  | C <sub>11</sub> H <sub>13</sub> O <sub>10</sub> Cl             |
| C <sub>18</sub> H <sub>24</sub> O <sub>3</sub> | Decreased                                                | Constant     | Decreased         | AR                  | C <sub>18</sub> H <sub>25</sub> O <sub>4</sub> Cl              |
| C <sub>12</sub> H <sub>12</sub> O <sub>5</sub> | Decreased                                                | Increased    | Constant          | AR                  | C <sub>12</sub> H <sub>13</sub> O <sub>6</sub> Cl              |
| C <sub>16</sub> H <sub>18</sub> O <sub>5</sub> | Decreased                                                | Constant     | Increased         | AR                  | C <sub>16</sub> H <sub>19</sub> O <sub>6</sub> Cl              |

2 \*ES – electrophilic substitution, AR – addition reaction, ND – not detected

**Table S7** Complete list of CHON precursors and their fates during water treatment processes

| Precursors                                                     | Changes in intensities between two consecutive processes |              |                   | DBPs                                                                          |
|----------------------------------------------------------------|----------------------------------------------------------|--------------|-------------------|-------------------------------------------------------------------------------|
|                                                                | RW→CW                                                    | CW→FW        | FW→Finished water |                                                                               |
| C <sub>6</sub> H <sub>10</sub> ON <sub>2</sub>                 | Decreased                                                | Increased    | Increased         | C <sub>6</sub> H <sub>7</sub> ON <sub>2</sub> Cl <sub>3</sub>                 |
| C <sub>8</sub> H <sub>7</sub> O <sub>4</sub> N                 | Disappeared                                              | Newly Formed | Constant          | C <sub>8</sub> H <sub>5</sub> O <sub>4</sub> NCl <sub>2</sub>                 |
| C <sub>9</sub> H <sub>14</sub> O <sub>3</sub> N <sub>2</sub>   | Decreased                                                | Increased    | Constant          | C <sub>9</sub> H <sub>13</sub> O <sub>3</sub> N <sub>2</sub> Cl               |
| C <sub>12</sub> H <sub>12</sub> O <sub>2</sub> N <sub>2</sub>  | Constant                                                 | Constant     | Decreased         | C <sub>12</sub> H <sub>11</sub> O <sub>2</sub> N <sub>2</sub> Cl              |
| C <sub>11</sub> H <sub>8</sub> O <sub>3</sub> N <sub>2</sub>   | Decreased                                                | Increased    | Constant          | C <sub>11</sub> H <sub>7</sub> O <sub>3</sub> N <sub>2</sub> Cl               |
| C <sub>12</sub> H <sub>16</sub> O <sub>4</sub> N <sub>2</sub>  | Disappeared                                              | Newly Formed | Decreased         | C <sub>12</sub> H <sub>13</sub> O <sub>4</sub> N <sub>2</sub> Cl <sub>3</sub> |
| C <sub>19</sub> H <sub>26</sub> O <sub>3</sub> N <sub>2</sub>  | Decreased                                                | Constant     | Constant          | C <sub>19</sub> H <sub>25</sub> O <sub>3</sub> N <sub>2</sub> Cl              |
| C <sub>16</sub> H <sub>22</sub> O <sub>2</sub> N <sub>2</sub>  | Decreased                                                | Constant     | Constant          | C <sub>16</sub> H <sub>21</sub> O <sub>2</sub> N <sub>2</sub> Cl              |
| C <sub>15</sub> H <sub>22</sub> O <sub>3</sub> N <sub>2</sub>  | Decreased                                                | Constant     | Constant          | C <sub>15</sub> H <sub>21</sub> O <sub>3</sub> N <sub>2</sub> Cl              |
| C <sub>21</sub> H <sub>20</sub> O <sub>3</sub> N <sub>2</sub>  | Decreased                                                | Constant     | Constant          | C <sub>21</sub> H <sub>18</sub> O <sub>3</sub> N <sub>2</sub> Cl <sub>2</sub> |
| C <sub>22</sub> H <sub>22</sub> O <sub>3</sub> N <sub>2</sub>  | Disappeared                                              | ND           | Newly Formed      | C <sub>22</sub> H <sub>21</sub> O <sub>3</sub> N <sub>2</sub> Cl              |
| C <sub>15</sub> H <sub>32</sub> O <sub>11</sub> N <sub>2</sub> | Constant                                                 | Disappeared  | Newly Formed      | C <sub>15</sub> H <sub>31</sub> O <sub>11</sub> N <sub>2</sub> Cl             |
| C <sub>21</sub> H <sub>27</sub> O <sub>10</sub> N              | Decreased                                                | Increased    | Constant          | C <sub>21</sub> H <sub>26</sub> O <sub>10</sub> NCl                           |
| C <sub>16</sub> H <sub>22</sub> O <sub>2</sub> N <sub>2</sub>  | Decreased                                                | Constant     | Constant          | C <sub>16</sub> H <sub>21</sub> O <sub>2</sub> N <sub>2</sub> Cl              |
| C <sub>10</sub> H <sub>20</sub> O <sub>8</sub> N <sub>2</sub>  | Constant                                                 | Constant     | Constant          | C <sub>10</sub> H <sub>19</sub> O <sub>8</sub> N <sub>2</sub> Cl              |
| C <sub>12</sub> H <sub>23</sub> O <sub>3</sub> N               | Decreased                                                | Constant     | Constant          | C <sub>12</sub> H <sub>20</sub> O <sub>3</sub> NCl <sub>3</sub>               |
| C <sub>17</sub> H <sub>22</sub> O <sub>3</sub> N <sub>2</sub>  | Decreased                                                | Constant     | Constant          | C <sub>17</sub> H <sub>21</sub> O <sub>3</sub> N <sub>2</sub> Cl              |
| C <sub>17</sub> H <sub>22</sub> O <sub>4</sub> N <sub>2</sub>  | Decreased                                                | Constant     | Constant          | C <sub>17</sub> H <sub>21</sub> O <sub>4</sub> N <sub>2</sub> Cl              |
| C <sub>19</sub> H <sub>30</sub> O <sub>2</sub> N <sub>2</sub>  | Newly Formed                                             | Disappeared  | ND                | C <sub>19</sub> H <sub>29</sub> O <sub>2</sub> N <sub>2</sub> Cl              |
| C <sub>19</sub> H <sub>26</sub> O <sub>3</sub> N <sub>2</sub>  | Decreased                                                | Constant     | Constant          | C <sub>19</sub> H <sub>25</sub> O <sub>3</sub> N <sub>2</sub> Cl              |
| C <sub>16</sub> H <sub>22</sub> O <sub>6</sub> N <sub>2</sub>  | Decreased                                                | Increased    | Increased         | C <sub>16</sub> H <sub>21</sub> O <sub>6</sub> N <sub>2</sub> Cl              |
| C <sub>16</sub> H <sub>22</sub> O <sub>2</sub> N <sub>2</sub>  | Decreased                                                | Constant     | Constant          | C <sub>16</sub> H <sub>21</sub> O <sub>2</sub> N <sub>2</sub> Cl              |
| C <sub>16</sub> H <sub>12</sub> O <sub>7</sub> N <sub>2</sub>  | Decreased                                                | Disappeared  | Newly Formed      | C <sub>16</sub> H <sub>11</sub> O <sub>7</sub> N <sub>2</sub> Cl              |
| C <sub>15</sub> H <sub>22</sub> O <sub>3</sub> N <sub>2</sub>  | Decreased                                                | Constant     | Constant          | C <sub>15</sub> H <sub>21</sub> O <sub>3</sub> N <sub>2</sub> Cl              |
| C <sub>19</sub> H <sub>30</sub> O <sub>2</sub> N <sub>2</sub>  | Newly Formed                                             | Disappeared  | ND                | C <sub>19</sub> H <sub>29</sub> O <sub>2</sub> N <sub>2</sub> Cl              |
| C <sub>17</sub> H <sub>12</sub> O <sub>7</sub> N <sub>2</sub>  | Decreased                                                | Constant     | Constant          | C <sub>17</sub> H <sub>11</sub> O <sub>7</sub> N <sub>2</sub> Cl              |
| C <sub>21</sub> H <sub>20</sub> O <sub>3</sub> N <sub>2</sub>  | Decreased                                                | Constant     | Constant          | C <sub>21</sub> H <sub>18</sub> O <sub>3</sub> N <sub>2</sub> Cl <sub>2</sub> |
| C <sub>17</sub> H <sub>18</sub> O <sub>9</sub> N <sub>2</sub>  | Newly Formed                                             | Disappeared  | ND                | C <sub>17</sub> H <sub>17</sub> O <sub>9</sub> N <sub>2</sub> Cl              |
| C <sub>21</sub> H <sub>28</sub> O <sub>6</sub> N <sub>2</sub>  | Decreased                                                | Constant     | Constant          | C <sub>21</sub> H <sub>27</sub> O <sub>6</sub> N <sub>2</sub> Cl              |
| C <sub>15</sub> H <sub>32</sub> O <sub>11</sub> N <sub>2</sub> | Constant                                                 | Disappeared  | Newly Formed      | C <sub>15</sub> H <sub>31</sub> O <sub>11</sub> N <sub>2</sub> Cl             |
| C <sub>21</sub> H <sub>27</sub> O <sub>10</sub> N              | Decreased                                                | Increased    | Constant          | C <sub>21</sub> H <sub>26</sub> O <sub>10</sub> NCl                           |
| C <sub>17</sub> H <sub>18</sub> O <sub>3</sub> N <sub>2</sub>  | Constant                                                 | Increased    | Increased         | C <sub>17</sub> H <sub>17</sub> O <sub>3</sub> N <sub>2</sub> Cl              |
| C <sub>16</sub> H <sub>18</sub> O <sub>4</sub> N <sub>2</sub>  | ND                                                       | Newly Formed | Constant          | C <sub>16</sub> H <sub>17</sub> O <sub>4</sub> N <sub>2</sub> Cl              |
| C <sub>15</sub> H <sub>22</sub> O <sub>3</sub> N <sub>2</sub>  | Decreased                                                | Constant     | Constant          | C <sub>15</sub> H <sub>21</sub> O <sub>3</sub> N <sub>2</sub> Cl              |
| C <sub>21</sub> H <sub>24</sub> O <sub>3</sub> N <sub>2</sub>  | Decreased                                                | Increased    | Increased         | C <sub>21</sub> H <sub>23</sub> O <sub>3</sub> N <sub>2</sub> Cl              |
| C <sub>17</sub> H <sub>10</sub> O <sub>8</sub> N <sub>2</sub>  | Disappeared                                              | Newly Formed | Increased         | C <sub>17</sub> H <sub>9</sub> O <sub>8</sub> N <sub>2</sub> Cl               |
| C <sub>21</sub> H <sub>27</sub> O <sub>10</sub> N              | Decreased                                                | Increased    | Constant          | C <sub>21</sub> H <sub>26</sub> O <sub>10</sub> NCl                           |
| C <sub>12</sub> H <sub>10</sub> O <sub>4</sub> N <sub>2</sub>  | Decreased                                                | Increased    | Constant          | C <sub>12</sub> H <sub>9</sub> O <sub>4</sub> N <sub>2</sub> Cl               |

| Precursors           | Changes in intensities between two consecutive processes |              |                   | DBPs                   |
|----------------------|----------------------------------------------------------|--------------|-------------------|------------------------|
|                      | RW→CW                                                    | CW→FW        | FW→Finished water |                        |
| $C_{17}H_{20}O_4N_2$ | Decreased                                                | Increased    | Constant          | $C_{17}H_{19}O_4N_2Cl$ |
| $C_{14}H_{23}O_7N$   | ND                                                       | Newly Formed | Increased         | $C_{14}H_{22}O_7NCl$   |

\*ND – not detected
